# Supplementary material for: Gold-catalyzed 1,2-iminonitronation of electron-deficient alkynes with nitrosoarenes to afford α-imidoyl nitrones
Source: Royal Society of Chemistry journal article supplement (doi:10.1039/c4cc06962e), 2014-01-01

## Supporting Information

### Gold-Catalyzed 1,2-Iminonitrations of Electron-deficient Alkynes with Nitrosoarenes to Afford $\alpha$ -Imidoyl Nitrones

RahulKumar Rajmani Singh and Rai-Shung Liu\*

Department of Chemistry, National Tsing-Hua University, Hsinchu, Taiwan, ROC

E-mail: [rsliu@mx.nthu.edu.tw](mailto:rsliu@mx.nthu.edu.tw)

#### Contents:

|                                                             |    |
|-------------------------------------------------------------|----|
| (I) Representative Synthetic Procedures-----                | 2  |
| (II) Standard procedures for catalytic operations-----      | 3  |
| (III) Spectral data for key compounds -----                 | 4  |
| (IV) X-ray crystallographic data of compound 3j-----        | 14 |
| (V) X-ray crystallographic data of compound 5a-----         | 25 |
| (VI) $^1\text{H}$ NMR and $^{13}\text{C}$ NMR Spectra ----- | 33 |

## (I) Experimental Procedure for the synthesis of ethyl propiolate:

### (a) General Information

Unless otherwise noted, all the reactions for the preparation of the substrates were performed in oven-dried glassware under nitrogen atmosphere with freshly distilled solvents. The catalytic reactions were performed in dry solvent. DCE was distilled from  $\text{CaH}_2$  under nitrogen. THF was distilled from Na metal under nitrogen. All other commercial reagents were used without further purification, unless otherwise indicated.  $^1\text{H}$  NMR and  $^{13}\text{C}$  NMR spectra were recorded on a Bruker 400 MHz, Varian 500 MHz, 600 MHz and 700 MHz Spectrometers using chloroform-d as the internal standards. Ethyl propiolate were prepared according to the literature procedures <sup>[S1]</sup>. Ethyl propiolate with variable substituents (**1a-1m**) were prepared according to literature procedures <sup>[S2]</sup>.

### Reference:

- [S1] H. Gao, J. Zhang, *Chem. Eur. J.*, 2012, **18**, 2777.  
[S2] (a) S.T. Gadge, B. M. Bhanage, *Synlett*, 2013, **24**, 981. (b) J. G. Kim, D. H. Kang, D.O. Jang, *Synlett*, **2008**, 3, 443.  
[S3] A. Duschek, S. F. Kirsch, *Chem. Eur. J.* 2009, **15**, 10713

### (b) Representative Synthetic Procedures:

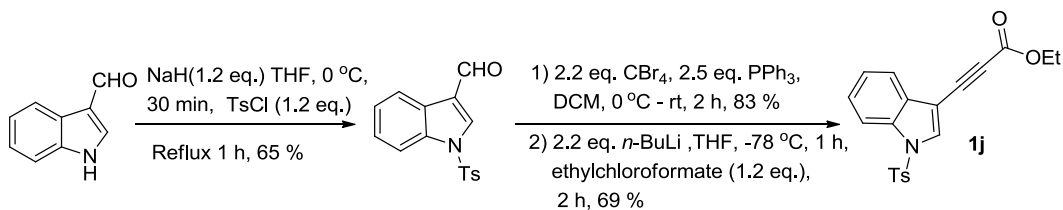

#### (1) Synthesis of 1-tosyl-1H-indole-3-carbaldehyde.

Sodium hydride (35 mmol) was added at 0 °C to a solution of indole-3-carbaldehyde (5 g, 35 mmol) in anhydrous THF (100 mL) under an argon atmosphere. The resulting mixture was stirred 30 min at 0 °C, to this solution was added THF solution (20 mL) of sulfonyl chloride (35 mmol) at room temperature. The resulting mixture was refluxed for 1 h, cooled, poured into water (100 mL). The organic layer was extracted with DCM, washed with brine, dried over  $\text{MgSO}_4$ , and concentrated. The crude product was chromatographed through a silica gel column to afford 1-tosyl-1H-indole-3-carbaldehyde (6.69 g, 22 mmol, 65 %) as brownish solid.

### (I) Synthesis of ethyl 3-(1-tosyl-1H-indol-3-yl) propiolate (**1j**).

To a dichloromethane solution (DCM, 20 ml) of carbon tetrabromide (9.88 g, 29.3 mmol) was added a DCM solution (20 ml) of triphenylphosphine (8.5 g, 32.5 mmol) slowly at 0 °C; the resulting mixture was stirred for 10 min at 0 °C, to this solution was added a DCM (30 mL) solution of compound 1-tosyl-1H-indole-3-carbaldehyde (4.00 g, 13.30 mmol). The resulting solution was stirred for 1 hour at room temperature before quenching with water. The organic layer was extracted with DCM, washed with brine, dried over MgSO<sub>4</sub>, and concentrated. The crude product was chromatographed on a silica column to afford 3-(2,2-dibromovinyl)-1-tosyl-1H-indole (5.0 g, 11 mmol, 83 %) as a white solid.

To a THF solution of 3-(2,2-dibromovinyl)-1-tosyl-1H-indole (2.0 g, 20.14 mmol) was added *n*-BuLi (5.0 mL, 2.5 M in hexane, 11.0 mmol) drop wise at -78 °C for 30 min and allow to stir for 1 hour at -78 °C. To this solution was added a THF (5 mL) solution of ethyl chloroformate (0.57 g, 5.3 mmol). The resulting solution was stirred at -78 °C for 2 hours and monitored by TLC. After completion of reaction it was quenched by saturated solution of NH<sub>4</sub>Cl at room temperature. The aqueous layer was separated and extracted with (3 x 20 mL) of ether. The organic layer is washed with water (50 ml), brine (50 mL), dried over MgSO<sub>4</sub>, and concentrated. The crude product was chromatographed on a silica column to afford **1j** (1.10 g, 3.0 mmol, 69 %) as white solid.

### (II) Standard Catalytic Procedure for Gold-catalyzed 1,2-iminonitronation reactions:

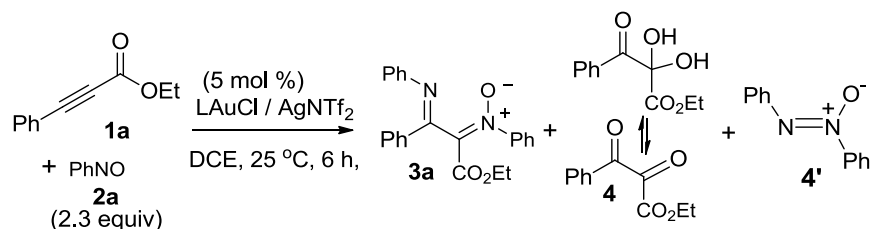

A reaction tube was charged with P(*t*-Bu)<sub>2</sub>(*o*-biphenyl)AuCl(I) (15.1 mg, 0.029 mmol) and Silver(I) Bis(trifluoromethanesulfonyl)imide (11.0 mg, 0.029 mmol), and to this mixture was added dry Dichloroethane (DCE) (1.0 mL). The resulting solution was stirred at room temperature for 5 min. To this solution was added a Dichloroethane (DCE) solution (2 mL) of compound **1a** (100 mg, 0.57 mmol) and Nitrosobenzene (141 mg, 1.3 mmol). The mixture was kept stirring at 25 °C for 6 h before it was filtered over a short silica bed. The solvent was concentrated, and the crude product was chromatographed through a silica gel column to afford compound **3a** as yellow oil (101 mg, 0.27 mmol, 77 %) together with  $\alpha,\beta$ -dioxo ester **4** (13%) and diazene oxide **4'** (0.14 equiv) in minor proportion .

### (III) Spectral data :

#### Spectral data for ethyl 3-(*o*-tolyl)propiolate (**1e**).

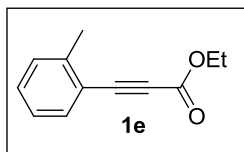

Light yellow liquid ;  $^1\text{H}$  NMR (600 MHz,  $\text{CDCl}_3$ ):  $\delta$  7.52 (d,  $J = 7.7$  Hz, 1 H), 7.31 (t,  $J = 7.6$  Hz, 1 H), 7.21 (d,  $J = 7.7$  Hz, 1 H), 7.16 (t,  $J = 7.6$  Hz, 1 H), 4.27 (q,  $J = 7.1$  Hz, 2 H), 2.47 (s, 3H) 1.34 (t,  $J = 7.1$  Hz, 3 H);  $^{13}\text{C}$  NMR (150 MHz,  $\text{CDCl}_3$ ): 154.2, 142.2, 133.3, 130.5, 129.7, 125.7, 119.5, 85.1, 84.4, 61.9, 20.5, 14.1 ; HRMS: calcd. for  $\text{C}_{12}\text{H}_{12}\text{O}_2$  : 188.0837; Found: 188.0833.

#### Spectral data for ethyl 3-(benzo[*b*]thiophen-3-yl) propiolate (**1h**).

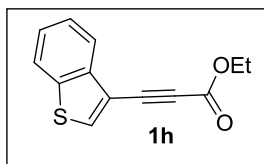

Dark Brown liquid ;  $^1\text{H}$  NMR (600 MHz,  $\text{CDCl}_3$ ):  $\delta$  7.99~7.97 (m, 1 H), 7.90 (s, 1 H), 7.83 (t,  $J = 8.0$  Hz, 1 H), 7.46 ~ 7.44 (m, 1 H), 7.21 (t,  $J = 7.8$  Hz, 1 H), 4.31 (q,  $J = 7.1$  Hz, 2 H), 1.36 (t,  $J = 7.1$  Hz, 3 H);  $^{13}\text{C}$  NMR (150 MHz,  $\text{CDCl}_3$ ): 154.0, 138.7, 138.5, 135.6, 125.5, 125.2, 122.9, 122.6, 114.9, 83.4, 79.9, 62.0, 14.0; HRMS: calcd. for  $\text{C}_{13}\text{H}_{10}\text{O}_2\text{S}$  : 230.0402; Found: 230.0397.

#### Spectral data for ethyl 3-(benzofuran-2-yl) propiolate (**1i**).

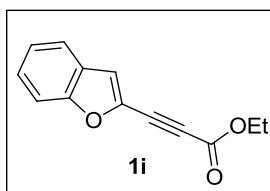

Yellow liquid ;  $^1\text{H}$  NMR (600 MHz,  $\text{CDCl}_3$ ):  $\delta$  7.57 (d,  $J = 7.8$  Hz, 1 H), 7.44 (d,  $J = 8.3$  Hz, 1 H), 7.37 (t,  $J = 7.2$  Hz, 1 H), 7.26 ~ 7.22 (m, 2 H), 4.29 (q,  $J = 7.1$  Hz, 2 H), 1.33 (t,  $J = 7.1$  Hz, 3 H);  $^{13}\text{C}$  NMR (150 MHz,  $\text{CDCl}_3$ ): 155.5, 153.2, 135.7, 127.1, 123.7, 121.8, 116.9, 111.5, 86.3, 76.0, 62.3, 13.9; HRMS: calcd. for  $\text{C}_{13}\text{H}_{10}\text{O}_3$  : 214.0630; Found: 214.0626.

**Spectral data for ethyl 3-(1-tosyl-1H-indol-3-yl) propiolate (1j).**

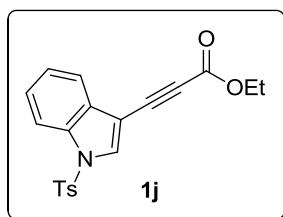

White solid;  $^1\text{H}$  NMR (600 MHz,  $\text{CDCl}_3$ ):  $\delta$  7.96 ~ 7.94 (m, 2 H), 7.76 (dd,  $J = 6.7, 1.8$  Hz, 2 H), 7.68 ~ 7.66 (m, 1 H), 7.37 ~ 7.34 (m, 1 H), 7.31 ~ 7.28 (m, 1 H), 7.23 (d,  $J = 8.1$  Hz, 2 H), 4.28 (q,  $J = 7.1$  Hz, 2H), 2.33 (s, 3H), 1.34 (t,  $J = 7.1$  Hz, 3H);  $^{13}\text{C}$  NMR (150 MHz,  $\text{CDCl}_3$ ):  $\delta$  153.9, 145.8, 134.5, 134.0, 132.6, 130.1, 130.0, 127.0, 125.9, 124.2, 120.6, 113.6, 101.6, 85.1, 78.4, 62.0, 21.5, 14.0, (one carbon merged with others); HRMS: calcd. for  $\text{C}_{20}\text{H}_{17}\text{NO}_4\text{S}$ : 367.0878; Found: 367.0879.

**Spectral data for (*E*)-ethyl 4-methyl-5-phenylpent-4-en-2-ynoate (1k).**

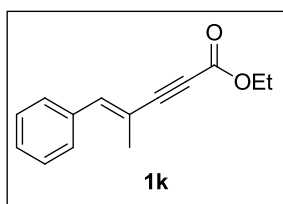

Pale Yellow liquid ;  $^1\text{H}$  NMR (600 MHz,  $\text{CDCl}_3$ ):  $\delta$  7.36 ~ 7.33 (m, 3 H), 7.28 ~ 7.26 (m, 2 H), 7.08 (s, 1 H), 4.24 (q,  $J = 7.1$  Hz, 2H), 2.01 (s, 3 H), 1.31 (t,  $J = 7.1$  Hz, 3 H);  $^{13}\text{C}$  NMR (150 MHz,  $\text{CDCl}_3$ ):  $\delta$  153.9, 141.6, 135.5, 129.0, 128.3, 128.1, 116.6, 89.8, 79.3, 61.7, 18.1, 13.9; HRMS: calcd. for  $\text{C}_{14}\text{H}_{14}\text{O}_2$ : 214.0994; Found: 214.0992.

**Spectral data for (*E*)-*N*-((*E*)-1-ethoxy-1-oxo-3-phenyl-3-(phenylimino) propan-2-ylidene) aniline oxide (3a)**

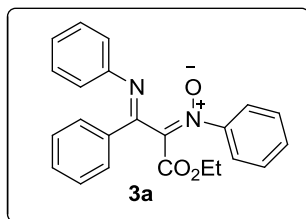

Pale Yellow liquid;  $^1\text{H}$  NMR (400 MHz,  $\text{CDCl}_3$ ):  $\delta$  7.90 (dd,  $J = 7.2, 1.7$  Hz, 2 H), 7.52 ~ 7.45 (m, 3 H), 7.42 (d,  $J = 7.3$  Hz, 1 H), 7.38 ~ 7.30 (m, 4 H), 7.15 (t,  $J = 7.5$  Hz, 1 H), 7.08~7.05 (m, 4 H),

3.89 (q,  $J = 7.12$  Hz, 2 H), 0.94 (t,  $J = 7.2$  Hz, 3 H);  $^{13}\text{C}$  NMR (150 MHz,  $\text{CDCl}_3$ ):  $\delta$  159.3, 159.7, 150.4, 147.5, 137.6, 135.4, 131.4, 130.3, 128.9, 128.8, 128.7, 127.3, 125.2, 122.7, 118.5, 61.9, 13.6; ESI-MS: calcd. for  $\text{C}_{23}\text{H}_{20}\text{N}_2\text{O}_3$ : 372.1474; Found: 372.1472.

#### Spectral data ethyl 2,3-dioxo-3-phenylpropanoate (4)

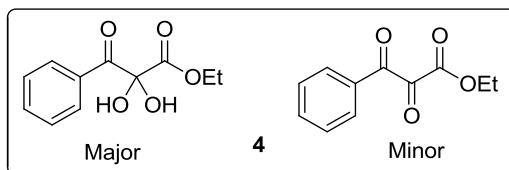

Yellow liquid; (1:2 mixture of ketone and hydrate) *Ketone* :  $^1\text{H}$  NMR (600 MHz,  $\text{CDCl}_3$ ):  $\delta$  7.97 (dd,  $J = 7.2, 1.2$  Hz, 2 H), 7.70 ~ 7.67 (m, 1 H), 7.54 ~ 7.52 (m, 2 H), 4.41 (q,  $J = 7.2$  Hz, 2 H), 1.37 (t,  $J = 7.2$  Hz, 3 H);  $^{13}\text{C}$  NMR (175 MHz,  $\text{CDCl}_3$ ):  $\delta$  190.2, 183.7, 160.5, 135.5, 131.5, 130.0, 129.1, 63.3, 13.9; *Hydrate*:  $^1\text{H}$  NMR (600 MHz,  $\text{CDCl}_3$ ):  $\delta$  8.05 (dd,  $J = 8.9, 0.6$  Hz, 2 H), 7.62 ~ 7.59 (m, 1 H), 7.47 ~ 7.44 (m, 2 H), 4.19 (q,  $J = 7.2$  Hz, 2 H), 1.06 (t,  $J = 7.2$  Hz, 3 H);  $^{13}\text{C}$  NMR (150 MHz,  $\text{CDCl}_3$ ):  $\delta$  191.5, 169.9, 134.7, 131.3, 130.1, 128.8, 91.5, 63.2, 13.6 ; HRMS: calcd. for  $\text{C}_{11}\text{H}_{12}\text{O}_5$ : 224.0685; Found: 224.0685.

The spectral data are in agreement with the values reported previously in the literature.<sup>[S3]</sup>

#### Spectral data for (*E*)-*N*-((*E*)-1-ethoxy-1-oxo-3-(phenylimino)-3-(*p*-tolyl) propan-2-ylidene) aniline oxide (3b)

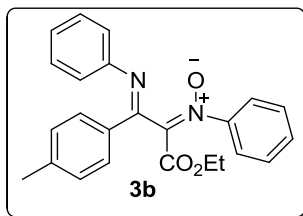

Light Yellow liquid;  $^1\text{H}$  NMR (600 MHz,  $\text{CDCl}_3$ ):  $\delta$  7.80 (dd,  $J = 6.5, 1.7$  Hz, 2 H), 7.40 (t,  $J = 6.5$  Hz, 1 H), 7.37 ~ 7.27(m, 6 H), 7.14 (t,  $J = 6.3$  Hz, 1 H), 7.07 ~ 7.05(m, 4 H), 3.94 (q,  $J = 7.1$  Hz, 2 H), 2.41 (s, 3 H), 0.94 (t,  $J = 7.1$  Hz, 3 H);  $^{13}\text{C}$  NMR (150 MHz,  $\text{CDCl}_3$ ):  $\delta$  159.4, 158.5, 150.6, 147.6, 141.9, 137.8, 132.7, 130.3, 129.6, 128.9, 128.7, 127.3, 125.0, 122.7, 118.6, 61.9, 21.5, 13.6; HRMS: calcd. for  $\text{C}_{24}\text{H}_{22}\text{N}_2\text{O}_3$ : 386.1630; Found: 386.1628.

#### Spectral data for (*E*)-*N*-((*E*)-1-ethoxy-3-(4-methoxyphenyl)-1-oxo-3-(phenylimino) propan-2-ylidene) aniline oxide (3c).

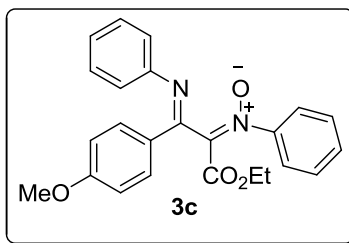

Yellow liquid;  $^1\text{H NMR}$  (400 MHz,  $\text{CDCl}_3$ ):  $\delta$  7.85 (dd,  $J = 6.9, 2.0$  Hz, 2 H), 7.43 ~ 7.29 (m, 5 H), 7.13 (t,  $J = 7.4$  Hz, 1 H), 7.05 (dd,  $J = 8.3, 1.2$  Hz, 4 H), 6.97 (dd,  $J = 6.9, 2.0$  Hz, 2 H), 3.89 (q,  $J = 6.9$  Hz, 2 H), 3.86 (s, 3 H), 0.95 (t,  $J = 7.4$  Hz, 3 H);  $^{13}\text{C NMR}$  (100 MHz,  $\text{CDCl}_3$ ):  $\delta$  162.3, 159.5, 157.8, 150.6, 147.6, 137.8, 130.3, 129.1, 128.9, 128.7, 128.1, 124.9, 122.7, 118.6, 114.3, 61.9, 55.4, 13.7; HRMS: calcd. for  $\text{C}_{24}\text{H}_{22}\text{N}_2\text{O}_4$ : 402.1580; Found: 402.1581.

**Spectral data for (*E*)-*N*-((*E*)-1-(4-chlorophenyl)-3-ethoxy-3-oxo-1-(phenylimino)propan-2-ylidene)aniline oxide (3d).**

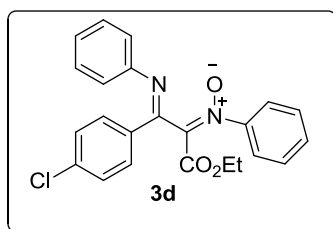

Pale Yellow liquid;  $^1\text{H NMR}$  (600 MHz,  $\text{CDCl}_3$ ):  $\delta$  7.85 (d,  $J = 8.5$  Hz, 2 H), 7.45 ~ 7.42 (m, 3 H), 7.37 (t,  $J = 8.1$  Hz, 2 H), 7.33 (t,  $J = 7.6$  Hz, 2 H), 7.16 (t,  $J = 7.4$  Hz, 1 H), 7.08 (d,  $J = 9.3$  Hz, 2 H), 7.04 (d,  $J = 8.4$  Hz, 2 H), 3.88 (q,  $J = 7.1$  Hz, 2 H), 0.94 (t,  $J = 7.1$  Hz, 3 H);  $^{13}\text{C NMR}$  (150 MHz,  $\text{CDCl}_3$ ):  $\delta$  159.1, 157.6, 150.1, 147.3, 137.5, 137.1, 133.8, 130.5, 129.2, 129.0, 128.8, 128.6, 125.4, 122.6, 118.4, 62.0, 13.6; HRMS: calcd. for  $\text{C}_{23}\text{H}_{19}\text{ClN}_2\text{O}_3$ : 406.1084; Found: 406.1070.

**Spectral data for ((*E*)-*N*-((*E*)-1-ethoxy-1-oxo-3-(phenylimino)-3-(4-(trifluoromethyl)phenyl)propan-2-ylidene)aniline oxide (3e).**

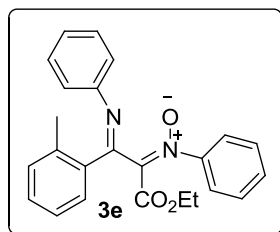

Yellow liquid;  $^1\text{H NMR}$  (600 MHz,  $\text{CDCl}_3$ ):  $\delta$  7.55 (d,  $J = 7.8$  Hz, 1 H), 7.41 ~ 7.38 (m, 1 H), 7.34 ~ 7.29 (m, 6 H), 7.26 ~ 7.23 (m, 1 H), 7.16 ~ 7.13 (m, 1 H), 7.09 ~ 7.06 (m, 4 H), 3.84 (q,  $J =$

7.2 Hz, 2 H), 2.67 (s, 3H), 0.92 (t,  $J = 7.2$  Hz, 3 H);  $^{13}\text{C}$  NMR (150 MHz,  $\text{CDCl}_3$ ):  $\delta$  159.8, 159.7, 150.4, 147.5, 138.9, 138.7, 135.7, 131.6, 130.4, 130.0, 128.9, 128.7, 128.0, 125.7, 125.3, 122.7, 118.7, 61.9, 20.2, 13.5; HRMS: calcd. for  $\text{C}_{24}\text{H}_{22}\text{F}_3\text{N}_2\text{O}_3$ : 386.1630, Found: 386.1623.

**Spectral data for (*E*)-*N*-((*Z*)-1-ethoxy-1-oxo-3-(phenylimino)-3-(thiophen-2-yl) propan-2-ylidene) aniline oxide (3f).**

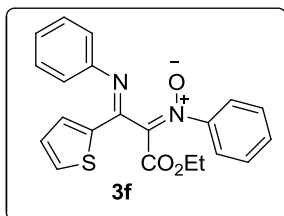

Brownish liquid;  $^1\text{H}$  NMR (400 MHz,  $\text{CDCl}_3$ ):  $\delta$  7.53 (dd,  $J = 5.0, 1.0$  Hz, 1 H), 7.45 ~ 7.39 (m, 3 H), 7.37 (s, 1 H), 7.35 ~ 7.29 (m, 2 H), 7.16 (t,  $J = 8.5$  Hz, 1 H), 7.10 ~ 7.07 (m, 5 H), 3.92 (q,  $J = 7.0$  Hz, 2 H), 0.96 (t,  $J = 7.1$  Hz, 3 H);  $^{13}\text{C}$  NMR (100 MHz,  $\text{CDCl}_3$ ):  $\delta$  159.1, 152.8, 149.7, 147.6, 141.2, 136.8, 130.7, 130.4, 129.1, 129.0, 128.7, 127.7, 125.4, 122.6, 118.9, 62.0, 13.6; HRMS: calcd. for  $\text{C}_{21}\text{H}_{18}\text{N}_2\text{O}_3\text{S}$ : 378.1038; Found: 378.1028

**Spectral data for (*E*)-*N*-((*E*)-1-ethoxy-3-(furan-3-yl)-1-oxo-3-(phenylimino) propan-2-ylidene) aniline oxide (3g).**

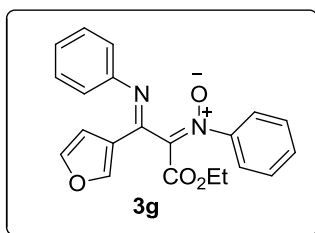

Light Yellow liquid;  $^1\text{H}$  NMR (600 MHz,  $\text{CDCl}_3$ ):  $\delta$  7.84 (s, 1 H), 7.49 (t,  $J = 1.5$  Hz, 1 H), 7.43 ~ 7.40 (m, 1 H), 7.37 ~ 7.34 (m, 2 H), 7.32 ~ 7.29 (m, 2 H), 7.15 ~ 7.12 (m, 1 H), 7.06 ~ 7.04 (m, 4 H), 6.93 (dd,  $J = 3.2, 0.8$  Hz, 1 H), 3.92 (q,  $J = 7.1$  Hz, 2 H), 0.96 (t,  $J = 7.1$  Hz, 3 H);  $^{13}\text{C}$  NMR (150 MHz,  $\text{CDCl}_3$ ):  $\delta$  159.2, 152.0, 150.1, 147.6, 144.3, 144.2, 130.5, 129.2, 129.0, 128.7, 125.3, 124.7, 122.6, 118.7, 108.8, 62.0, 13.6; ESI-MS: calcd. for  $\text{C}_{21}\text{H}_{18}\text{N}_2\text{O}_4$ : 362.1267; Found: 362.1265.

**Spectral data for (*E*)-*N*-((*E*)-1-(benzo[*b*]thiophen-3-yl)-3-ethoxy-3-oxo-1-(phenylimino) propan-2-ylidene) aniline oxide (3h).**



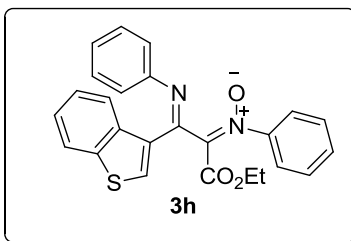

Brownish liquid;  $^1\text{H NMR}$  (600 MHz,  $\text{CDCl}_3$ ):  $\delta$  8.98 (d,  $J = 8.2$  Hz, 1 H), 7.89 ~ 7.87 (m, 2 H), 7.50 ~ 7.41 (m, 3 H), 7.38 ~ 7.35 (m, 4 H), 7.19 ~ 7.14 (m, 3 H), 7.06 (d,  $J = 7.9$  Hz, 2 H), 3.93 (q,  $J = 7.1$  Hz, 2 H), 0.94 (t,  $J = 7.1$  Hz, 3 H);  $^{13}\text{C NMR}$  (150 MHz,  $\text{CDCl}_3$ ):  $\delta$  159.5, 154.1, 150.3, 147.6, 140.5, 137.7, 136.7, 132.3, 131.9, 130.4, 129.0, 128.7, 125.9, 125.4, 125.3, 125.1, 122.6, 122.3, 118.5, 62.0, 13.6; HRMS: calcd. for  $\text{C}_{25}\text{H}_{20}\text{N}_2\text{O}_3\text{S}$ : 428.1195; Found: 428.1186.

**Spectral data for (*E*)-*N*-((*Z*)-1-(benzofuran-2-yl)-3-ethoxy-3-oxo-1-(phenylimino)propan-2-ylidene)aniline oxide (3i).**

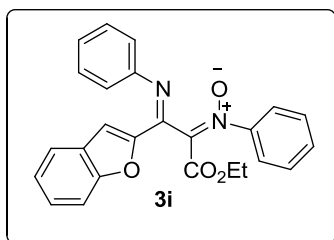

Light yellow liquid;  $^1\text{H NMR}$  (600 MHz,  $\text{CDCl}_3$ ):  $\delta$  7.65 (d,  $J = 7.8$  Hz, 1 H), 7.57 (d,  $J = 8.3$  Hz, 1 H), 7.45 (t,  $J = 6.5$  Hz, 1 H), 7.41 ~ 7.38 (m, 3 H), 7.34 (t,  $J = 7.5$  Hz, 3 H), 7.27 (t,  $J = 7.5$  Hz, 1 H), 7.19 ~ 7.17 (m, 3 H), 7.13 (d,  $J = 7.4$  Hz, 2 H), 3.92 (q,  $J = 7.0$  Hz, 2 H), 0.95 (t,  $J = 7.0$  Hz, 3 H);  $^{13}\text{C NMR}$  (150 MHz,  $\text{CDCl}_3$ ):  $\delta$  159.1, 155.7, 151.5, 149.8, 149.7, 147.7, 135.7, 130.6, 129.0, 128.7, 127.8, 126.8, 125.8, 123.6, 122.7, 122.3, 118.9, 112.1, 110.4, 62.0, 13.6; HRMS: calcd. for  $\text{C}_{25}\text{H}_{20}\text{N}_2\text{O}_4$ : 412.1423; Found: 412.1433.

**Spectral data for (*E*)-*N*-((*E*)-1-ethoxy-1-oxo-3-(phenylimino)-3-(1-tosyl-1H-indol-3-yl)propan-2-ylidene)aniline oxide (3j).**

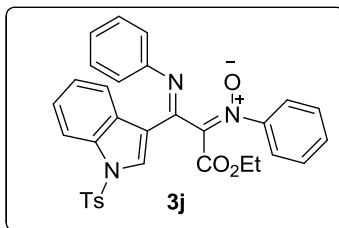

White solid;  $^1\text{H}$  NMR (600 MHz,  $\text{CDCl}_3$ ):  $\delta$  8.49 (d,  $J = 7.7$  Hz, 1 H), 7.95 ~ 7.92 (m, 2 H), 7.78 (d,  $J = 8.4$  Hz, 2 H), 7.45 ~ 7.34 (m, 4 H), 7.33 ~ 7.31 (m, 3 H), 7.23 (d,  $J = 8.5$  Hz, 2 H), 7.16 (t,  $J = 7.4$  Hz, 1 H), 7.11 ~ 7.07 (m, 4 H), 3.87 (q,  $J = 7.1$  Hz, 2 H), 2.33 (s, 3 H), 0.94 (t,  $J = 6.1$  Hz, 3 H);  $^{13}\text{C}$  NMR (150 MHz,  $\text{CDCl}_3$ ):  $\delta$  159.3, 153.1, 150.4, 147.6, 145.5, 137.1, 135.5, 134.6, 130.4, 130.1, 129.1, 128.9, 128.7, 128.1, 127.0, 125.7, 125.2, 124.4, 123.6, 122.6, 119.1, 118.6, 113.2, 62.0, 21.5, 13.7; HRMS: calcd. for  $\text{C}_{32}\text{H}_{27}\text{N}_3\text{O}_5\text{S}$ : 565.1671; Found: 565.1674.

**Spectral data for (*E*)-*N*-((3*E*,4*E*)-1-ethoxy-4-methyl-1-oxo-5-phenyl-3-(phenylimino) pent-4-en-2-ylidene) aniline oxide (3k)**

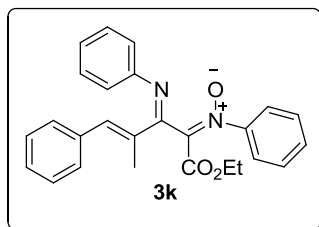

Yellow liquid;  $^1\text{H}$  NMR (600 MHz,  $\text{CDCl}_3$ ):  $\delta$  7.42 ~ 7.38 (m, 5 H), 7.34 ~ 7.29 (m, 5 H), 7.12 (t,  $J = 7.1$  Hz, 1 H), 7.04 (s, 1 H), 7.10 (dd,  $J = 8.5, 1.0$  Hz, 2 H), 6.93 (d,  $J = 7.4$  Hz, 2 H), 3.96 (q,  $J = 7.1$  Hz, 2 H), 2.37 (s, 3 H), 1.01 (t,  $J = 7.1$  Hz, 3 H);  $^{13}\text{C}$  NMR (150 MHz,  $\text{CDCl}_3$ ):  $\delta$  161.5, 159.6, 150.7, 147.7, 137.8, 136.4, 135.9, 135.7, 130.2, 129.7, 128.9, 128.6, 128.3, 127.9, 124.7, 122.6, 118.1, 61.9, 14.4, 13.7; HRMS: calcd. for  $\text{C}_{26}\text{H}_{24}\text{N}_2\text{O}_3$ : 412.1787; Found: 412.1777.

**Spectral data for (*E*)-*N*-((*E*)-1-cyclohexyl-3-ethoxy-3-oxo-1-(phenylimino) propan-2-ylidene) aniline oxide (3l)**

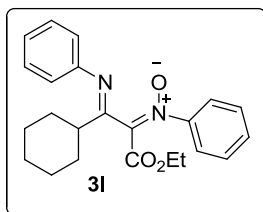

Yellow liquid;  $^1\text{H}$  NMR (600 MHz,  $\text{CDCl}_3$ ):  $\delta$  7.39 ~ 7.37 (m, 2 H), 7.35 ~ 7.33 (m, 1 H), 7.24 ~ 7.21 (m, 2 H), 7.19 ~ 7.17 (m, 2 H), 6.92 ~ 6.91 (m, 2 H), 6.89 ~ 6.87 (m, 1 H), 3.96 (q,  $J = 7.1$  Hz, 2 H), 2.27 (t,  $J = 6.4$  Hz, 2H), 2.18 (t,  $J = 6.2$  Hz, 2H), 1.75 ~ 1.71 (m, 3 H), 1.65 ~ 1.61 (m, 4 H), 0.88 (t,  $J = 7.1$  Hz, 3 H);  $^{13}\text{C}$  NMR (150 MHz,  $\text{CDCl}_3$ ):  $\delta$  161.7, 143.9, 139.8, 137.3, 128.8, 128.4, 127.8, 127.3, 120.4, 118.3, 111.6, 58.9, 23.3, 23.2, 23.1, 22.7, 13.8; HRMS: calcd. For  $\text{C}_{23}\text{H}_{26}\text{N}_2\text{O}_3$ : 378.1943; Found: 378.1938.

**Spectral data for (*E*)-*N*-((*E*)-1-cyclopropyl-3-ethoxy-3-oxo-1-(phenylimino) propan-2-ylidene) aniline oxide (3m).**

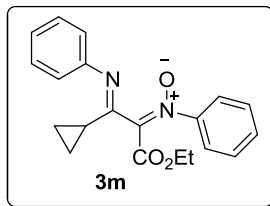

Light Yellow liquid;  $^1\text{H}$  NMR (600 MHz,  $\text{CDCl}_3$ ):  $\delta$  7.41 ~ 7.38 (m, 1 H), 7.34 (t,  $J = 7.4$  Hz, 2 H); 7.24 ~ 7.22 (m, 2 H), 7.07 ~ 7.03 (m, 3 H), 6.88 (d,  $J = 7.4$  Hz, 2 H), 3.84 (q,  $J = 7.1$  Hz, 2 H), 2.03 ~ 2.00 (m, 1 H), 1.23 ~ 1.20 (m, 2 H), 1.06 ~ 1.04 (m, 2 H), 0.99 (t,  $J = 7.1$  Hz, 3 H);  $^{13}\text{C}$  NMR (150 MHz,  $\text{CDCl}_3$ ):  $\delta$  164.7, 159.1, 150.1, 147.5, 138.3, 130.3, 128.9, 128.6, 124.8, 122.9, 118.9, 61.8, 17.3, 13.3, 9.5; HRMS: calcd. for  $\text{C}_{20}\text{H}_{20}\text{N}_2\text{O}_3$ : 336.1474; Found: 336.1474.

**Spectral data for (*E*)-*N*-((*E*)-1-((3,5-dimethylphenyl)imino)-3-ethoxy-3-oxo-1-phenylpropan-2-ylidene)-3,5-dimethylaniline oxide (5b).**

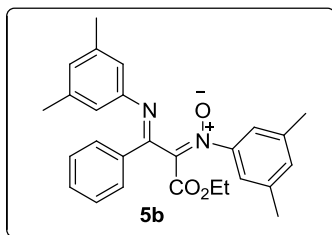

Pale Yellow liquid;  $^1\text{H}$  NMR (600 MHz,  $\text{CDCl}_3$ ):  $\delta$  7.90 ~ 7.89 (m, 2 H), 7.48 ~ 7.46 (m, 3 H), 7.04 (m, 1 H), 6.80 (s, 1 H), 6.70 (t,  $J = 0.7$  Hz, 4 H), 3.89 (q,  $J = 6.8$  Hz, 2H), 2.30 (d,  $J = 5.6$  Hz, 12 H) 0.96 (t,  $J = 6.9$  Hz, 3 H);  $^{13}\text{C}$  NMR (150 MHz,  $\text{CDCl}_3$ ):  $\delta$  159.3, 158.4, 150.4, 147.7, 138.9, 138.2, 137.4, 135.6, 131.8, 131.2, 128.8, 127.4, 126.8, 120.3, 116.4, 61.7, 21.3, 21.1, 13.7; ESI-MS: calcd. for  $\text{C}_{27}\text{H}_{28}\text{N}_2\text{O}_3$ : 428.2100; Found: 428.2094.

**Spectral data for (*E*)-4-(*tert*-butyl)-*N*-((*E*)-1-((4-(*tert*-butyl)phenyl)imino)-3-ethoxy-3-oxo-1-phenylpropan-2-ylidene) aniline oxide (5c).**

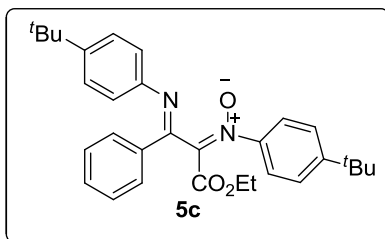

Yellow liquid;  $^1\text{H}$  NMR (600 MHz,  $\text{CDCl}_3$ ):  $\delta$  7.88 (dd,  $J = 7.9, 1.6$  Hz, 2 H), 7.49 ~ 7.44 (m, 3 H), 7.35 ~ 7.31 (m, 4 H), 7.00 ~ 6.97 (m, 4 H), 3.88 (q,  $J = 7.1$  Hz, 2H), 1.29 (s, 9 H), 1.28 (s, 9 H), 0.89 (t,  $J = 7.1$  Hz, 3 H);  $^{13}\text{C}$  NMR (150 MHz,  $\text{CDCl}_3$ ): 159.7, 158.8, 154.0, 148.1, 147.9, 145.3, 137.5, 135.6, 131.2, 128.4, 127.4, 125.8, 125.5, 122.4, 118.3, 61.8, 34.9, 34.4, 31.4, 13.1, 13.6; ESI-MS: calcd. for  $\text{C}_{31}\text{H}_{36}\text{N}_2\text{O}_3$ : 484.2726; Found: 484.2732.

**Spectral data for (*E*)-*N*-((*E*)-1-ethoxy-3-((4-methoxyphenyl)imino)-1-oxo-3-phenylpropan-2-ylidene)-4-methoxyaniline oxide (5d).**

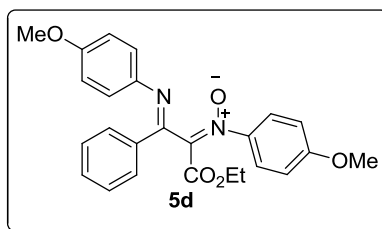

Light Yellow liquid;  $^1\text{H}$  NMR (400 MHz,  $\text{CDCl}_3$ ):  $\delta$  7.87 (dd,  $J = 7.2, 2.1$  Hz, 2 H), 7.46 ~ 7.44 (m, 3 H), 7.16 (dd,  $J = 8.0, 0.9$  Hz, 2 H), 7.02 (dd,  $J = 7.9, 0.9$  Hz, 2 H), 6.87 ~ 6.83 (m, 4 H), 3.88 (q,  $J = 7.1$  Hz, 2H), 3.80 (s, 3 H), 3.77 (s, 3 H), 0.94 (t,  $J = 7.1$  Hz, 3 H);  $^{13}\text{C}$  NMR (100 MHz,  $\text{CDCl}_3$ ):  $\delta$  161.2, 159.8, 158.7, 157.6, 143.8, 140.7, 137.3, 135.8, 131.1, 128.8, 127.3, 124.4, 120.2, 114.0, 113.9, 61.9, 55.6, 55.4, 13.7; ESI-MS: calcd. for  $\text{C}_{25}\text{H}_{24}\text{N}_2\text{O}_5$ : 432.1685; Found: 432.1687.

**Spectral data for (*E*)-4-bromo-*N*-((*E*)-1-((4-bromophenyl)imino)-3-ethoxy-3-oxo-1-phenylpropan-2-ylidene) aniline oxide (5e).**

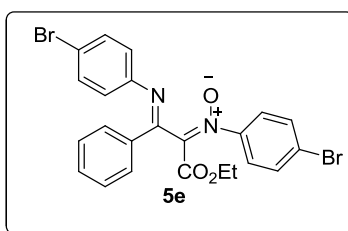

Brown liquid;  $^1\text{H}$  NMR (600 MHz,  $\text{CDCl}_3$ ):  $\delta$  7.85 (dd,  $J = 8.3, 1.4$  Hz, 2 H), 7.54 ~ 7.50 (m, 3 H), 7.48 ~ 7.45 (m, 2 H), 7.43 (dd,  $J = 6.6, 2.1$  Hz, 2 H), 6.95 (dd,  $J = 6.7, 2.0$  Hz, 2 H), 6.92 (dd,  $J = 6.7, 2.0$  Hz, 2 H), 3.94 (q,  $J = 7.1$  Hz, 2 H), 0.98 (t,  $J = 7.1$  Hz, 3 H);  $^{13}\text{C}$  NMR (150 MHz,  $\text{CDCl}_3$ ):  $\delta$  159.1, 158.9, 149.3, 146.2, 137.6, 135.0, 132.3, 131.8, 129.0, 127.4, 124.7, 124.3, 120.3, 118.4, 62.3, 13.7 (one carbon merged with others); ESI-MS: calcd. for  $\text{C}_{23}\text{H}_{18}\text{Br}_2\text{N}_2\text{O}_3$ : 527.9684; Found: 527.9687.

**Spectral data for (*E*)-4-chloro-*N*-((*E*)-1-((4-chlorophenyl)imino)-3-ethoxy-3-oxo-1-phenylpropan-2-ylidene) aniline oxide (**5f**).**

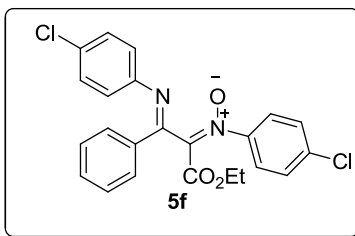

Yellow liquid;  $^1\text{H}$  NMR (400 MHz,  $\text{CDCl}_3$ ):  $\delta$  7.86 (dd,  $J = 8.1, 1.2$  Hz, 2 H), 7.52 ~ 7.45 (m, 3 H), 7.37 (d,  $J = 8.6$  Hz, 2 H), 7.29 (d,  $J = 8.5$  Hz, 2 H), 7.04 (d,  $J = 8.8$  Hz, 2 H), 6.99 (d,  $J = 8.5$  Hz, 2 H), 3.94 (q,  $J = 7.1$  Hz, 2 H), 0.97 (t,  $J = 7.1$  Hz, 3 H);  $^{13}\text{C}$  NMR (100 MHz,  $\text{CDCl}_3$ ):  $\delta$  159.0, 158.9, 148.8, 145.6, 137.6, 136.6, 134.9, 131.8, 130.6, 129.3, 128.9, 128.8, 127.3, 124.0, 119.9, 62.3, 13.7; ESI-MS: calcd. for  $\text{C}_{23}\text{H}_{18}\text{Cl}_2\text{N}_2\text{O}_3$ : 440.0694; Found: 440.0690.

**Spectral data for (*N,N'E,N,N'E*)-*N,N'*-(1,4-diethoxy-1,4-dioxobutane-2,3-diylidene) bis (aniline oxide) (**6a**).**

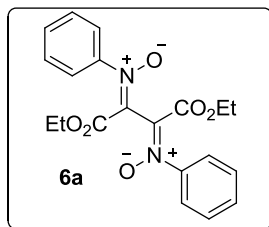

Yellow solid;  $^1\text{H}$  NMR (600 MHz,  $\text{CDCl}_3$ ):  $\delta$  7.50 ~ 7.42 (m, 10 H), 4.10 (q,  $J = 7.1$  Hz, 4 H), 1.01 (t,  $J = 7.1$  Hz, 6 H);  $^{13}\text{C}$  NMR (150 MHz,  $\text{CDCl}_3$ ):  $\delta$  160.0, 147.5, 135.3, 131.1, 129.1, 123.5, 62.4, 13.6; HRMS: calcd. for  $\text{C}_{20}\text{H}_{20}\text{Cl}_2\text{N}_2\text{O}_6$ : 384.1321; Found: 384.1359.

#### (IV) X-ray data for compound 3j

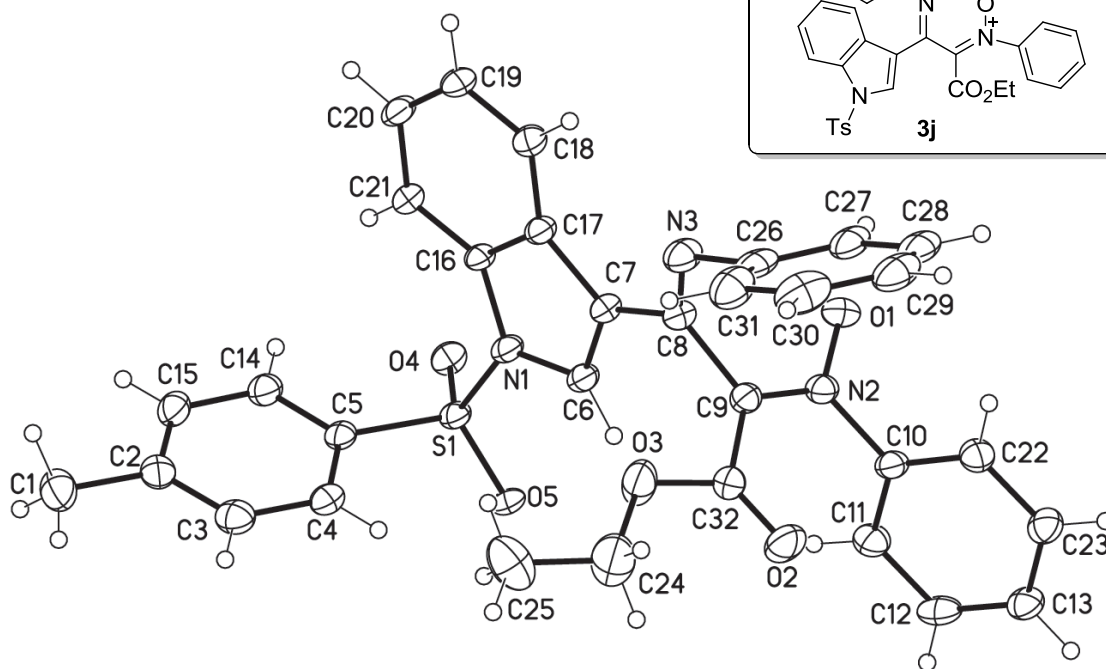

:

Table 1. Crystal data and structure refinement for mo\_130802lt\_0m.

|                                 |                                                                 |                  |
|---------------------------------|-----------------------------------------------------------------|------------------|
| Identification code             | mo_130802lt_0m                                                  |                  |
| Empirical formula               | C <sub>32</sub> H <sub>27</sub> N <sub>3</sub> O <sub>5</sub> S |                  |
| Formula weight                  | 565.63                                                          |                  |
| Temperature                     | 100(2) K                                                        |                  |
| Wavelength                      | 0.71073 Å                                                       |                  |
| Crystal system                  | Triclinic                                                       |                  |
| Space group                     | P -1                                                            |                  |
| Unit cell dimensions            | a = 10.1408(17) Å                                               | α = 103.814(4)°. |
|                                 | b = 10.8111(18) Å                                               | β = 92.891(4)°.  |
|                                 | c = 13.136(2) Å                                                 | γ = 95.161(4)°.  |
| Volume                          | 1389.0(4) Å <sup>3</sup>                                        |                  |
| Z                               | 2                                                               |                  |
| Density (calculated)            | 1.352 Mg/m <sup>3</sup>                                         |                  |
| Absorption coefficient          | 0.164 mm <sup>-1</sup>                                          |                  |
| F(000)                          | 592                                                             |                  |
| Crystal size                    | 0.25 x 0.20 x 0.20 mm <sup>3</sup>                              |                  |
| Theta range for data collection | 1.60 to 26.53°.                                                 |                  |
| Index ranges                    | -12 ≤ h ≤ 12, -13 ≤ k ≤ 13, -7 ≤ l ≤ 16                         |                  |

|                                   |                                             |
|-----------------------------------|---------------------------------------------|
| Reflections collected             | 19602                                       |
| Independent reflections           | 5725 [R(int) = 0.0530]                      |
| Completeness to theta = 26.53°    | 98.9 %                                      |
| Absorption correction             | Semi-empirical from equivalents             |
| Max. and min. transmission        | 0.9486 and 0.7194                           |
| Refinement method                 | Full-matrix least-squares on F <sup>2</sup> |
| Data / restraints / parameters    | 5725 / 0 / 372                              |
| Goodness-of-fit on F <sup>2</sup> | 1.042                                       |
| Final R indices [I>2sigma(I)]     | R1 = 0.0574, wR2 = 0.1466                   |
| R indices (all data)              | R1 = 0.0776, wR2 = 0.1619                   |
| Largest diff. peak and hole       | 0.663 and -0.712 e.Å <sup>-3</sup>          |

Table 2. Atomic coordinates ( $\times 10^4$ ) and equivalent isotropic displacement parameters ( $\text{\AA}^2 \times 10^3$ ) for mo\_130802lt\_0m. U(eq) is defined as one third of the trace of the orthogonalized  $U^{ij}$  tensor.

|       | x       | y       | z        | U(eq) |
|-------|---------|---------|----------|-------|
| S(1)  | 6325(1) | 8107(1) | 8617(1)  | 20(1) |
| O(1)  | 7810(2) | 9853(2) | 4683(1)  | 28(1) |
| O(2)  | 6047(2) | 6199(2) | 3127(2)  | 38(1) |
| O(3)  | 7165(2) | 5558(2) | 4386(2)  | 41(1) |
| O(4)  | 6568(2) | 9238(2) | 9444(1)  | 25(1) |
| O(5)  | 5128(2) | 7862(2) | 7945(1)  | 24(1) |
| N(1)  | 7539(2) | 8141(2) | 7802(2)  | 21(1) |
| N(2)  | 7146(2) | 8769(2) | 4274(2)  | 22(1) |
| N(3)  | 9854(2) | 7565(2) | 4827(2)  | 29(1) |
| C(1)  | 6991(3) | 3605(3) | 10485(2) | 37(1) |
| C(2)  | 6823(2) | 4718(2) | 10003(2) | 27(1) |
| C(3)  | 6344(2) | 4534(2) | 8958(2)  | 29(1) |
| C(4)  | 6200(2) | 5567(2) | 8518(2)  | 24(1) |
| C(5)  | 6554(2) | 6788(2) | 9138(2)  | 21(1) |
| C(6)  | 7338(2) | 7935(2) | 6721(2)  | 21(1) |
| C(7)  | 8534(2) | 7981(2) | 6288(2)  | 21(1) |
| C(8)  | 8713(2) | 7763(2) | 5175(2)  | 23(1) |
| C(9)  | 7497(2) | 7694(2) | 4452(2)  | 22(1) |
| C(10) | 5982(2) | 8826(2) | 3588(2)  | 22(1) |

|       |          |         |          |       |
|-------|----------|---------|----------|-------|
| C(11) | 4732(2)  | 8715(2) | 3949(2)  | 28(1) |
| C(12) | 3644(2)  | 8790(2) | 3290(2)  | 30(1) |
| C(13) | 3825(2)  | 8988(2) | 2303(2)  | 27(1) |
| C(14) | 7028(2)  | 7002(2) | 10181(2) | 26(1) |
| C(15) | 7153(2)  | 5962(3) | 10608(2) | 29(1) |
| C(16) | 8916(2)  | 8323(2) | 8079(2)  | 20(1) |
| C(17) | 9559(2)  | 8233(2) | 7149(2)  | 21(1) |
| C(18) | 10949(2) | 8396(2) | 7197(2)  | 24(1) |
| C(19) | 11638(2) | 8628(2) | 8172(2)  | 26(1) |
| C(20) | 10974(2) | 8710(2) | 9087(2)  | 25(1) |
| C(21) | 9596(2)  | 8566(2) | 9062(2)  | 22(1) |
| C(22) | 6191(2)  | 9039(2) | 2618(2)  | 25(1) |
| C(23) | 5096(2)  | 9118(2) | 1965(2)  | 27(1) |
| C(24) | 6613(4)  | 4246(3) | 3895(3)  | 58(1) |
| C(25) | 6827(4)  | 3458(3) | 4627(3)  | 52(1) |
| C(26) | 9997(2)  | 7361(3) | 3730(2)  | 32(1) |
| C(27) | 9942(2)  | 8354(3) | 3229(2)  | 32(1) |
| C(28) | 10145(2) | 8137(3) | 2164(2)  | 38(1) |
| C(29) | 10408(3) | 6954(3) | 1605(2)  | 43(1) |
| C(30) | 10472(3) | 5968(3) | 2108(2)  | 46(1) |
| C(31) | 10279(3) | 6165(3) | 3172(2)  | 40(1) |
| C(32) | 6808(2)  | 6433(2) | 3894(2)  | 26(1) |

---

Table 3. Bond lengths [ $\text{\AA}$ ] and angles [ $^\circ$ ] for mo\_130802lt\_0m.

|            |            |
|------------|------------|
| S(1)-O(4)  | 1.4213(17) |
| S(1)-O(5)  | 1.4301(16) |
| S(1)-N(1)  | 1.676(2)   |
| S(1)-C(5)  | 1.751(2)   |
| O(1)-N(2)  | 1.279(2)   |
| O(2)-C(32) | 1.200(3)   |
| O(3)-C(32) | 1.331(3)   |
| O(3)-C(24) | 1.457(3)   |
| N(1)-C(6)  | 1.384(3)   |



|             |          |
|-------------|----------|
| N(1)-C(16)  | 1.410(3) |
| N(2)-C(9)   | 1.315(3) |
| N(2)-C(10)  | 1.463(3) |
| N(3)-C(8)   | 1.282(3) |
| N(3)-C(26)  | 1.422(3) |
| C(1)-C(2)   | 1.506(3) |
| C(1)-H(1A)  | 0.9800   |
| C(1)-H(1B)  | 0.9800   |
| C(1)-H(1C)  | 0.9800   |
| C(2)-C(15)  | 1.391(4) |
| C(2)-C(3)   | 1.394(4) |
| C(3)-C(4)   | 1.390(3) |
| C(3)-H(3A)  | 0.9500   |
| C(4)-C(5)   | 1.380(3) |
| C(4)-H(4)   | 0.9500   |
| C(5)-C(14)  | 1.387(3) |
| C(6)-C(7)   | 1.367(3) |
| C(6)-H(6)   | 0.9500   |
| C(7)-C(8)   | 1.448(3) |
| C(7)-C(17)  | 1.455(3) |
| C(8)-C(9)   | 1.504(3) |
| C(9)-C(32)  | 1.478(3) |
| C(10)-C(22) | 1.370(3) |
| C(10)-C(11) | 1.381(3) |
| C(11)-C(12) | 1.388(3) |
| C(11)-H(11) | 0.9500   |
| C(12)-C(13) | 1.382(4) |
| C(12)-H(12) | 0.9500   |
| C(13)-C(23) | 1.390(4) |
| C(13)-H(13) | 0.9500   |
| C(14)-C(15) | 1.384(3) |
| C(14)-H(14) | 0.9500   |
| C(15)-H(15) | 0.9500   |
| C(16)-C(21) | 1.389(3) |
| C(16)-C(17) | 1.400(3) |
| C(17)-C(18) | 1.401(3) |

|                  |            |
|------------------|------------|
| C(18)-C(19)      | 1.384(3)   |
| C(18)-H(18)      | 0.9500     |
| C(19)-C(20)      | 1.395(3)   |
| C(19)-H(19)      | 0.9500     |
| C(20)-C(21)      | 1.391(3)   |
| C(20)-H(20)      | 0.9500     |
| C(21)-H(21)      | 0.9500     |
| C(22)-C(23)      | 1.390(3)   |
| C(22)-H(22)      | 0.9500     |
| C(23)-H(23)      | 0.9500     |
| C(24)-C(25)      | 1.450(4)   |
| C(24)-H(24A)     | 0.9900     |
| C(24)-H(24B)     | 0.9900     |
| C(25)-H(25A)     | 0.9800     |
| C(25)-H(25B)     | 0.9800     |
| C(25)-H(25C)     | 0.9800     |
| C(26)-C(31)      | 1.388(4)   |
| C(26)-C(27)      | 1.391(4)   |
| C(27)-C(28)      | 1.391(4)   |
| C(27)-H(27)      | 0.9500     |
| C(28)-C(29)      | 1.371(4)   |
| C(28)-H(28)      | 0.9500     |
| C(29)-C(30)      | 1.386(4)   |
| C(29)-H(29)      | 0.9500     |
| C(30)-C(31)      | 1.389(4)   |
| C(30)-H(30)      | 0.9500     |
| C(31)-H(31)      | 0.9500     |
| O(4)-S(1)-O(5)   | 120.74(10) |
| O(4)-S(1)-N(1)   | 107.13(10) |
| O(5)-S(1)-N(1)   | 104.38(10) |
| O(4)-S(1)-C(5)   | 108.48(11) |
| O(5)-S(1)-C(5)   | 110.20(10) |
| N(1)-S(1)-C(5)   | 104.65(10) |
| C(32)-O(3)-C(24) | 115.2(2)   |
| C(6)-N(1)-C(16)  | 108.62(18) |

|                  |            |
|------------------|------------|
| C(6)-N(1)-S(1)   | 124.69(16) |
| C(16)-N(1)-S(1)  | 126.64(15) |
| O(1)-N(2)-C(9)   | 122.3(2)   |
| O(1)-N(2)-C(10)  | 114.60(18) |
| C(9)-N(2)-C(10)  | 123.13(19) |
| C(8)-N(3)-C(26)  | 119.2(2)   |
| C(2)-C(1)-H(1A)  | 109.5      |
| C(2)-C(1)-H(1B)  | 109.5      |
| H(1A)-C(1)-H(1B) | 109.5      |
| C(2)-C(1)-H(1C)  | 109.5      |
| H(1A)-C(1)-H(1C) | 109.5      |
| H(1B)-C(1)-H(1C) | 109.5      |
| C(15)-C(2)-C(3)  | 118.9(2)   |
| C(15)-C(2)-C(1)  | 119.6(2)   |
| C(3)-C(2)-C(1)   | 121.5(2)   |
| C(4)-C(3)-C(2)   | 121.1(2)   |
| C(4)-C(3)-H(3A)  | 119.4      |
| C(2)-C(3)-H(3A)  | 119.4      |
| C(5)-C(4)-C(3)   | 118.5(2)   |
| C(5)-C(4)-H(4)   | 120.8      |
| C(3)-C(4)-H(4)   | 120.8      |
| C(4)-C(5)-C(14)  | 121.8(2)   |
| C(4)-C(5)-S(1)   | 119.32(17) |
| C(14)-C(5)-S(1)  | 118.83(19) |
| C(7)-C(6)-N(1)   | 109.9(2)   |
| C(7)-C(6)-H(6)   | 125.1      |
| N(1)-C(6)-H(6)   | 125.1      |
| C(6)-C(7)-C(8)   | 125.4(2)   |
| C(6)-C(7)-C(17)  | 107.0(2)   |
| C(8)-C(7)-C(17)  | 127.6(2)   |
| N(3)-C(8)-C(7)   | 120.7(2)   |
| N(3)-C(8)-C(9)   | 122.0(2)   |
| C(7)-C(8)-C(9)   | 117.2(2)   |
| N(2)-C(9)-C(32)  | 122.0(2)   |
| N(2)-C(9)-C(8)   | 118.0(2)   |
| C(32)-C(9)-C(8)  | 119.7(2)   |

|                   |            |
|-------------------|------------|
| C(22)-C(10)-C(11) | 122.7(2)   |
| C(22)-C(10)-N(2)  | 117.8(2)   |
| C(11)-C(10)-N(2)  | 119.5(2)   |
| C(10)-C(11)-C(12) | 118.4(2)   |
| C(10)-C(11)-H(11) | 120.8      |
| C(12)-C(11)-H(11) | 120.8      |
| C(13)-C(12)-C(11) | 120.1(2)   |
| C(13)-C(12)-H(12) | 119.9      |
| C(11)-C(12)-H(12) | 119.9      |
| C(12)-C(13)-C(23) | 120.3(2)   |
| C(12)-C(13)-H(13) | 119.8      |
| C(23)-C(13)-H(13) | 119.8      |
| C(15)-C(14)-C(5)  | 119.0(2)   |
| C(15)-C(14)-H(14) | 120.5      |
| C(5)-C(14)-H(14)  | 120.5      |
| C(14)-C(15)-C(2)  | 120.8(2)   |
| C(14)-C(15)-H(15) | 119.6      |
| C(2)-C(15)-H(15)  | 119.6      |
| C(21)-C(16)-C(17) | 122.9(2)   |
| C(21)-C(16)-N(1)  | 129.8(2)   |
| C(17)-C(16)-N(1)  | 107.29(19) |
| C(16)-C(17)-C(18) | 119.4(2)   |
| C(16)-C(17)-C(7)  | 107.25(19) |
| C(18)-C(17)-C(7)  | 133.3(2)   |
| C(19)-C(18)-C(17) | 118.2(2)   |
| C(19)-C(18)-H(18) | 120.9      |
| C(17)-C(18)-H(18) | 120.9      |
| C(18)-C(19)-C(20) | 121.3(2)   |
| C(18)-C(19)-H(19) | 119.3      |
| C(20)-C(19)-H(19) | 119.3      |
| C(21)-C(20)-C(19) | 121.7(2)   |
| C(21)-C(20)-H(20) | 119.2      |
| C(19)-C(20)-H(20) | 119.2      |
| C(16)-C(21)-C(20) | 116.5(2)   |
| C(16)-C(21)-H(21) | 121.8      |
| C(20)-C(21)-H(21) | 121.8      |

|                     |          |
|---------------------|----------|
| C(10)-C(22)-C(23)   | 118.5(2) |
| C(10)-C(22)-H(22)   | 120.7    |
| C(23)-C(22)-H(22)   | 120.7    |
| C(13)-C(23)-C(22)   | 119.9(2) |
| C(13)-C(23)-H(23)   | 120.0    |
| C(22)-C(23)-H(23)   | 120.0    |
| C(25)-C(24)-O(3)    | 108.8(3) |
| C(25)-C(24)-H(24A)  | 109.9    |
| O(3)-C(24)-H(24A)   | 109.9    |
| C(25)-C(24)-H(24B)  | 109.9    |
| O(3)-C(24)-H(24B)   | 109.9    |
| H(24A)-C(24)-H(24B) | 108.3    |
| C(24)-C(25)-H(25A)  | 109.5    |
| C(24)-C(25)-H(25B)  | 109.5    |
| H(25A)-C(25)-H(25B) | 109.5    |
| C(24)-C(25)-H(25C)  | 109.5    |
| H(25A)-C(25)-H(25C) | 109.5    |
| H(25B)-C(25)-H(25C) | 109.5    |
| C(31)-C(26)-C(27)   | 119.9(2) |
| C(31)-C(26)-N(3)    | 118.8(2) |
| C(27)-C(26)-N(3)    | 121.2(2) |
| C(26)-C(27)-C(28)   | 119.8(3) |
| C(26)-C(27)-H(27)   | 120.1    |
| C(28)-C(27)-H(27)   | 120.1    |
| C(29)-C(28)-C(27)   | 120.5(3) |
| C(29)-C(28)-H(28)   | 119.7    |
| C(27)-C(28)-H(28)   | 119.7    |
| C(28)-C(29)-C(30)   | 119.6(3) |
| C(28)-C(29)-H(29)   | 120.2    |
| C(30)-C(29)-H(29)   | 120.2    |
| C(29)-C(30)-C(31)   | 120.8(3) |
| C(29)-C(30)-H(30)   | 119.6    |
| C(31)-C(30)-H(30)   | 119.6    |
| C(26)-C(31)-C(30)   | 119.3(3) |
| C(26)-C(31)-H(31)   | 120.3    |
| C(30)-C(31)-H(31)   | 120.3    |

|                 |          |
|-----------------|----------|
| O(2)-C(32)-O(3) | 124.0(2) |
| O(2)-C(32)-C(9) | 127.3(2) |
| O(3)-C(32)-C(9) | 108.7(2) |

---

Symmetry transformations used to generate equivalent atoms:

Table 4. Anisotropic displacement parameters ( $\text{\AA}^2 \times 10^3$ ) for mo\_130802lt\_0m. The anisotropic displacement factor exponent takes the form:  $-2\pi^2 [ h^2 a^{*2} U^{11} + \dots + 2 h k a^* b^* U^{12} ]$

|       | U <sup>11</sup> | U <sup>22</sup> | U <sup>33</sup> | U <sup>23</sup> | U <sup>13</sup> | U <sup>12</sup> |
|-------|-----------------|-----------------|-----------------|-----------------|-----------------|-----------------|
| S(1)  | 14(1)           | 25(1)           | 22(1)           | 6(1)            | -1(1)           | 2(1)            |
| O(1)  | 23(1)           | 25(1)           | 32(1)           | 5(1)            | -2(1)           | -5(1)           |
| O(2)  | 40(1)           | 32(1)           | 38(1)           | 5(1)            | -16(1)          | -3(1)           |
| O(3)  | 60(1)           | 28(1)           | 34(1)           | 10(1)           | -17(1)          | -3(1)           |
| O(4)  | 21(1)           | 27(1)           | 26(1)           | 5(1)            | 0(1)            | 4(1)            |
| O(5)  | 11(1)           | 32(1)           | 29(1)           | 10(1)           | -4(1)           | 1(1)            |
| N(1)  | 14(1)           | 28(1)           | 22(1)           | 7(1)            | -2(1)           | 1(1)            |
| N(2)  | 18(1)           | 27(1)           | 22(1)           | 6(1)            | 1(1)            | -1(1)           |
| N(3)  | 20(1)           | 40(1)           | 26(1)           | 7(1)            | 1(1)            | 3(1)            |
| C(1)  | 28(1)           | 44(2)           | 47(2)           | 25(1)           | 8(1)            | 9(1)            |
| C(2)  | 13(1)           | 38(1)           | 36(1)           | 18(1)           | 8(1)            | 7(1)            |
| C(3)  | 22(1)           | 28(1)           | 36(1)           | 7(1)            | 2(1)            | 4(1)            |
| C(4)  | 18(1)           | 28(1)           | 27(1)           | 7(1)            | -1(1)           | 3(1)            |
| C(5)  | 13(1)           | 29(1)           | 22(1)           | 9(1)            | 2(1)            | 3(1)            |
| C(6)  | 17(1)           | 26(1)           | 20(1)           | 6(1)            | -1(1)           | 1(1)            |
| C(7)  | 16(1)           | 24(1)           | 23(1)           | 7(1)            | -3(1)           | 2(1)            |
| C(8)  | 19(1)           | 24(1)           | 24(1)           | 6(1)            | -2(1)           | 0(1)            |
| C(9)  | 18(1)           | 29(1)           | 19(1)           | 8(1)            | 2(1)            | 0(1)            |
| C(10) | 16(1)           | 22(1)           | 26(1)           | 6(1)            | -2(1)           | 0(1)            |
| C(11) | 20(1)           | 37(1)           | 28(1)           | 10(1)           | 5(1)            | 0(1)            |
| C(12) | 14(1)           | 34(1)           | 40(2)           | 5(1)            | 1(1)            | 1(1)            |
| C(13) | 20(1)           | 26(1)           | 37(1)           | 9(1)            | -3(1)           | 4(1)            |
| C(14) | 20(1)           | 34(1)           | 24(1)           | 8(1)            | 1(1)            | 1(1)            |
| C(15) | 20(1)           | 44(2)           | 27(1)           | 17(1)           | 2(1)            | 4(1)            |
| C(16) | 13(1)           | 22(1)           | 26(1)           | 8(1)            | -3(1)           | 2(1)            |

|       |       |       |       |       |        |       |
|-------|-------|-------|-------|-------|--------|-------|
| C(17) | 17(1) | 21(1) | 24(1) | 6(1)  | -4(1)  | 1(1)  |
| C(18) | 18(1) | 29(1) | 28(1) | 9(1)  | 1(1)   | 4(1)  |
| C(19) | 14(1) | 32(1) | 34(1) | 12(1) | -3(1)  | 2(1)  |
| C(20) | 19(1) | 28(1) | 28(1) | 7(1)  | -8(1)  | 2(1)  |
| C(21) | 18(1) | 25(1) | 22(1) | 7(1)  | -3(1)  | 2(1)  |
| C(22) | 20(1) | 27(1) | 29(1) | 8(1)  | 4(1)   | 4(1)  |
| C(23) | 28(1) | 27(1) | 28(1) | 9(1)  | -1(1)  | 6(1)  |
| C(24) | 88(3) | 29(2) | 52(2) | 9(1)  | -26(2) | -9(2) |
| C(25) | 68(2) | 36(2) | 53(2) | 13(2) | 16(2)  | 2(2)  |
| C(26) | 12(1) | 52(2) | 28(1) | 6(1)  | 1(1)   | 1(1)  |
| C(27) | 15(1) | 52(2) | 29(1) | 12(1) | 0(1)   | 2(1)  |
| C(28) | 15(1) | 67(2) | 32(1) | 16(1) | 0(1)   | -1(1) |
| C(29) | 22(1) | 79(2) | 27(1) | 11(2) | 2(1)   | 2(1)  |
| C(30) | 30(2) | 63(2) | 37(2) | -4(1) | 4(1)   | 10(1) |
| C(31) | 29(2) | 54(2) | 35(2) | 10(1) | 3(1)   | 10(1) |
| C(32) | 24(1) | 29(1) | 24(1) | 9(1)  | 0(1)   | 0(1)  |

Table 5. Hydrogen coordinates ( $\times 10^4$ ) and isotropic displacement parameters ( $\text{\AA}^2 \times 10^{-3}$ ) for mo\_130802lt\_0m.

|       | x     | y    | z     | U(eq) |
|-------|-------|------|-------|-------|
| H(1A) | 7937  | 3570 | 10654 | 55    |
| H(1B) | 6626  | 2807 | 9985  | 55    |
| H(1C) | 6521  | 3714 | 11128 | 55    |
| H(3A) | 6112  | 3688 | 8540  | 35    |
| H(4)  | 5866  | 5437 | 7808  | 29    |
| H(6)  | 6496  | 7784 | 6338  | 25    |
| H(11) | 4619  | 8590 | 4632  | 34    |
| H(12) | 2773  | 8705 | 3517  | 36    |
| H(13) | 3078  | 9036 | 1853  | 33    |
| H(14) | 7263  | 7850 | 10596 | 31    |
| H(15) | 7468  | 6100 | 11324 | 34    |
| H(18) | 11406 | 8349 | 6577  | 29    |

|        |       |      |      |    |
|--------|-------|------|------|----|
| H(19)  | 12581 | 8735 | 8219 | 32 |
| H(20)  | 11478 | 8868 | 9743 | 30 |
| H(21)  | 9143  | 8629 | 9686 | 26 |
| H(22)  | 7065  | 9130 | 2398 | 30 |
| H(23)  | 5216  | 9261 | 1288 | 32 |
| H(24A) | 5651  | 4220 | 3709 | 70 |
| H(24B) | 7052  | 3918 | 3243 | 70 |
| H(25A) | 7778  | 3517 | 4831 | 78 |
| H(25B) | 6499  | 2565 | 4292 | 78 |
| H(25C) | 6348  | 3758 | 5254 | 78 |
| H(27)  | 9766  | 9178 | 3612 | 38 |
| H(28)  | 10101 | 8814 | 1821 | 45 |
| H(29)  | 10546 | 6811 | 878  | 51 |
| H(30)  | 10650 | 5147 | 1720 | 55 |
| H(31)  | 10339 | 5489 | 3514 | 48 |

---



**(V) X-ray data for compound 5a :**

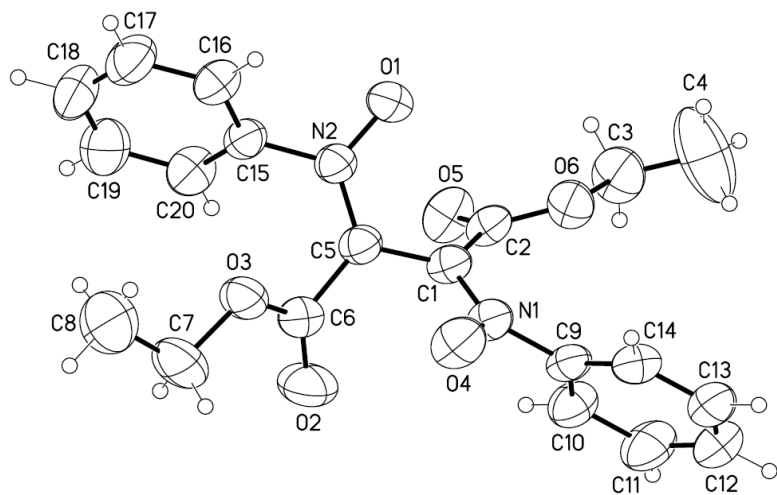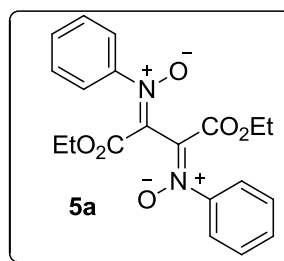

Table 7. Crystal data and structure refinement for mo\_140816\_0m\_a.

|                                 |                                                               |                  |
|---------------------------------|---------------------------------------------------------------|------------------|
| Identification code             | mo_140816_0m_a                                                |                  |
| Empirical formula               | C <sub>20</sub> H <sub>20</sub> N <sub>2</sub> O <sub>6</sub> |                  |
| Formula weight                  | 384.38                                                        |                  |
| Temperature                     | 296(2) K                                                      |                  |
| Wavelength                      | 0.71073 Å                                                     |                  |
| Crystal system                  | Monoclinic                                                    |                  |
| Space group                     | P 21/c                                                        |                  |
| Unit cell dimensions            | a = 11.8424(8) Å                                              | α = 90°.         |
|                                 | b = 10.9091(8) Å                                              | β = 105.318(2)°. |
|                                 | c = 16.0091(11) Å                                             | γ = 90°.         |
| Volume                          | 1994.7(2) Å <sup>3</sup>                                      |                  |
| Z                               | 4                                                             |                  |
| Density (calculated)            | 1.280 Mg/m <sup>3</sup>                                       |                  |
| Absorption coefficient          | 0.096 mm <sup>-1</sup>                                        |                  |
| F(000)                          | 808                                                           |                  |
| Crystal size                    | 0.20 x 0.18 x 0.08 mm <sup>3</sup>                            |                  |
| Theta range for data collection | 1.783 to 26.402°.                                             |                  |
| Index ranges                    | -14 ≤ h ≤ 14, -13 ≤ k ≤ 13, -19 ≤ l ≤ 20                      |                  |
| Reflections collected           | 15944                                                         |                  |
| Independent reflections         | 4076 [R(int) = 0.0463]                                        |                  |
| Completeness to theta = 25.242° | 99.8 %                                                        |                  |

|                                   |                                             |
|-----------------------------------|---------------------------------------------|
| Absorption correction             | Semi-empirical from equivalents             |
| Max. and min. transmission        | 0.9485 and 0.8871                           |
| Refinement method                 | Full-matrix least-squares on F <sup>2</sup> |
| Data / restraints / parameters    | 4076 / 0 / 255                              |
| Goodness-of-fit on F <sup>2</sup> | 1.030                                       |
| Final R indices [I>2sigma(I)]     | R1 = 0.0480, wR2 = 0.1198                   |
| R indices (all data)              | R1 = 0.0857, wR2 = 0.1396                   |
| Extinction coefficient            | n/a                                         |
| Largest diff. peak and hole       | 0.344 and -0.230 e.Å <sup>-3</sup>          |

Table 8. Atomic coordinates ( $\times 10^4$ ) and equivalent isotropic displacement parameters ( $\text{\AA}^2 \times 10^3$ ) for mo\_140816\_0m\_a. U(eq) is defined as one third of the trace of the orthogonalized  $U^{ij}$  tensor.

|       | x        | y       | z       | U(eq)  |
|-------|----------|---------|---------|--------|
| C(1)  | 3015(2)  | 2787(2) | 5043(1) | 45(1)  |
| C(2)  | 3945(2)  | 1858(2) | 5368(1) | 47(1)  |
| C(3)  | 5994(2)  | 1491(2) | 5839(2) | 74(1)  |
| C(4)  | 7053(2)  | 2127(4) | 5833(3) | 141(2) |
| C(5)  | 1915(2)  | 2409(2) | 4467(1) | 45(1)  |
| C(6)  | 813(2)   | 2783(2) | 4674(1) | 53(1)  |
| C(7)  | -1169(2) | 3356(3) | 4099(2) | 96(1)  |
| C(8)  | -2045(3) | 3187(4) | 3297(3) | 150(2) |
| C(9)  | 4019(2)  | 4375(2) | 6037(1) | 45(1)  |
| C(10) | 4181(2)  | 3793(2) | 6818(1) | 58(1)  |
| C(11) | 5035(2)  | 4229(3) | 7516(2) | 72(1)  |
| C(12) | 5707(2)  | 5224(3) | 7422(2) | 74(1)  |
| C(13) | 5510(2)  | 5813(2) | 6640(2) | 67(1)  |
| C(14) | 4650(2)  | 5401(2) | 5937(1) | 53(1)  |
| C(15) | 916(2)   | 1043(2) | 3308(1) | 46(1)  |
| C(16) | 570(2)   | 1209(2) | 2428(1) | 56(1)  |
| C(17) | -416(2)  | 612(2)  | 1954(2) | 70(1)  |
| C(18) | -1014(2) | -149(3) | 2356(2) | 79(1)  |
| C(19) | -648(2)  | -337(2) | 3230(2) | 79(1)  |
| C(20) | 335(2)   | 262(2)  | 3722(2) | 60(1)  |
| N(1)  | 3117(1)  | 3946(2) | 5294(1) | 47(1)  |

|      |         |         |         |       |
|------|---------|---------|---------|-------|
| N(2) | 1943(1) | 1694(2) | 3806(1) | 45(1) |
| O(1) | 2893(1) | 1489(2) | 3592(1) | 61(1) |
| O(2) | 754(2)  | 2861(2) | 5406(1) | 83(1) |
| O(3) | -34(1)  | 3030(1) | 3975(1) | 59(1) |
| O(4) | 2372(1) | 4752(1) | 4916(1) | 67(1) |
| O(5) | 3713(1) | 832(1)  | 5532(1) | 64(1) |
| O(6) | 5008(1) | 2291(1) | 5430(1) | 55(1) |

---

Table 9. Bond lengths [ $\text{\AA}$ ] and angles [ $^\circ$ ] for mo\_140816\_0m\_a.

|            |          |
|------------|----------|
| C(1)-N(1)  | 1.322(2) |
| C(1)-C(5)  | 1.443(3) |
| C(1)-C(2)  | 1.486(3) |
| C(2)-O(5)  | 1.199(2) |
| C(2)-O(6)  | 1.323(2) |
| C(3)-C(4)  | 1.435(4) |
| C(3)-O(6)  | 1.466(2) |
| C(3)-H(3A) | 0.9700   |
| C(3)-H(3B) | 0.9700   |
| C(4)-H(4A) | 0.9600   |
| C(4)-H(4B) | 0.9600   |
| C(4)-H(4C) | 0.9600   |
| C(5)-N(2)  | 1.322(2) |
| C(5)-C(6)  | 1.487(3) |
| C(6)-O(2)  | 1.196(2) |
| C(6)-O(3)  | 1.318(3) |
| C(7)-C(8)  | 1.433(4) |
| C(7)-O(3)  | 1.453(3) |
| C(7)-H(7A) | 0.9700   |
| C(7)-H(7B) | 0.9700   |
| C(8)-H(8A) | 0.9600   |
| C(8)-H(8B) | 0.9600   |
| C(8)-H(8C) | 0.9600   |
| C(9)-C(10) | 1.370(3) |
| C(9)-C(14) | 1.378(3) |

|                  |            |
|------------------|------------|
| C(9)-N(1)        | 1.451(2)   |
| C(10)-C(11)      | 1.379(3)   |
| C(10)-H(10)      | 0.9300     |
| C(11)-C(12)      | 1.378(4)   |
| C(11)-H(11)      | 0.9300     |
| C(12)-C(13)      | 1.372(4)   |
| C(12)-H(12)      | 0.9300     |
| C(13)-C(14)      | 1.378(3)   |
| C(13)-H(13)      | 0.9300     |
| C(14)-H(14)      | 0.9300     |
| C(15)-C(20)      | 1.371(3)   |
| C(15)-C(16)      | 1.372(3)   |
| C(15)-N(2)       | 1.452(2)   |
| C(16)-C(17)      | 1.377(3)   |
| C(16)-H(16)      | 0.9300     |
| C(17)-C(18)      | 1.358(4)   |
| C(17)-H(17)      | 0.9300     |
| C(18)-C(19)      | 1.366(4)   |
| C(18)-H(18)      | 0.9300     |
| C(19)-C(20)      | 1.385(3)   |
| C(19)-H(19)      | 0.9300     |
| C(20)-H(20)      | 0.9300     |
| N(1)-O(4)        | 1.280(2)   |
| N(2)-O(1)        | 1.2787(19) |
| N(1)-C(1)-C(5)   | 117.57(17) |
| N(1)-C(1)-C(2)   | 123.07(17) |
| C(5)-C(1)-C(2)   | 119.25(17) |
| O(5)-C(2)-O(6)   | 125.83(19) |
| O(5)-C(2)-C(1)   | 121.48(19) |
| O(6)-C(2)-C(1)   | 112.69(17) |
| C(4)-C(3)-O(6)   | 107.7(2)   |
| C(4)-C(3)-H(3A)  | 110.2      |
| O(6)-C(3)-H(3A)  | 110.2      |
| C(4)-C(3)-H(3B)  | 110.2      |
| O(6)-C(3)-H(3B)  | 110.2      |
| H(3A)-C(3)-H(3B) | 108.5      |

|                   |            |
|-------------------|------------|
| C(3)-C(4)-H(4A)   | 109.5      |
| C(3)-C(4)-H(4B)   | 109.5      |
| H(4A)-C(4)-H(4B)  | 109.5      |
| C(3)-C(4)-H(4C)   | 109.5      |
| H(4A)-C(4)-H(4C)  | 109.5      |
| H(4B)-C(4)-H(4C)  | 109.5      |
| N(2)-C(5)-C(1)    | 118.09(16) |
| N(2)-C(5)-C(6)    | 123.38(17) |
| C(1)-C(5)-C(6)    | 118.44(17) |
| O(2)-C(6)-O(3)    | 126.1(2)   |
| O(2)-C(6)-C(5)    | 121.4(2)   |
| O(3)-C(6)-C(5)    | 112.52(17) |
| C(8)-C(7)-O(3)    | 108.8(2)   |
| C(8)-C(7)-H(7A)   | 109.9      |
| O(3)-C(7)-H(7A)   | 109.9      |
| C(8)-C(7)-H(7B)   | 109.9      |
| O(3)-C(7)-H(7B)   | 109.9      |
| H(7A)-C(7)-H(7B)  | 108.3      |
| C(7)-C(8)-H(8A)   | 109.5      |
| C(7)-C(8)-H(8B)   | 109.5      |
| H(8A)-C(8)-H(8B)  | 109.5      |
| C(7)-C(8)-H(8C)   | 109.5      |
| H(8A)-C(8)-H(8C)  | 109.5      |
| H(8B)-C(8)-H(8C)  | 109.5      |
| C(10)-C(9)-C(14)  | 122.2(2)   |
| C(10)-C(9)-N(1)   | 119.62(18) |
| C(14)-C(9)-N(1)   | 118.09(18) |
| C(9)-C(10)-C(11)  | 118.4(2)   |
| C(9)-C(10)-H(10)  | 120.8      |
| C(11)-C(10)-H(10) | 120.8      |
| C(12)-C(11)-C(10) | 120.2(2)   |
| C(12)-C(11)-H(11) | 119.9      |
| C(10)-C(11)-H(11) | 119.9      |
| C(13)-C(12)-C(11) | 120.4(2)   |
| C(13)-C(12)-H(12) | 119.8      |
| C(11)-C(12)-H(12) | 119.8      |

|                   |            |
|-------------------|------------|
| C(12)-C(13)-C(14) | 120.2(2)   |
| C(12)-C(13)-H(13) | 119.9      |
| C(14)-C(13)-H(13) | 119.9      |
| C(13)-C(14)-C(9)  | 118.5(2)   |
| C(13)-C(14)-H(14) | 120.8      |
| C(9)-C(14)-H(14)  | 120.8      |
| C(20)-C(15)-C(16) | 121.8(2)   |
| C(20)-C(15)-N(2)  | 119.57(18) |
| C(16)-C(15)-N(2)  | 118.63(18) |
| C(15)-C(16)-C(17) | 118.9(2)   |
| C(15)-C(16)-H(16) | 120.6      |
| C(17)-C(16)-H(16) | 120.6      |
| C(18)-C(17)-C(16) | 120.0(2)   |
| C(18)-C(17)-H(17) | 120.0      |
| C(16)-C(17)-H(17) | 120.0      |
| C(17)-C(18)-C(19) | 120.9(2)   |
| C(17)-C(18)-H(18) | 119.6      |
| C(19)-C(18)-H(18) | 119.6      |
| C(18)-C(19)-C(20) | 120.2(2)   |
| C(18)-C(19)-H(19) | 119.9      |
| C(20)-C(19)-H(19) | 119.9      |
| C(15)-C(20)-C(19) | 118.2(2)   |
| C(15)-C(20)-H(20) | 120.9      |
| C(19)-C(20)-H(20) | 120.9      |
| O(4)-N(1)-C(1)    | 121.12(16) |
| O(4)-N(1)-C(9)    | 115.62(15) |
| C(1)-N(1)-C(9)    | 123.14(16) |
| O(1)-N(2)-C(5)    | 121.83(16) |
| O(1)-N(2)-C(15)   | 115.85(15) |
| C(5)-N(2)-C(15)   | 122.25(16) |
| C(6)-O(3)-C(7)    | 117.25(19) |
| C(2)-O(6)-C(3)    | 116.84(17) |

---

Symmetry transformations used to generate equivalent atoms:

Table 10. Anisotropic displacement parameters ( $\text{\AA}^2 \times 10^3$ ) for mo\_140816\_0m\_a. The anisotropic

displacement factor exponent takes the form:  $-2\pi^2[ h^2 a^{*2}U^{11} + \dots + 2 h k a^* b^* U^{12} ]$

|       | U <sup>11</sup> | U <sup>22</sup> | U <sup>33</sup> | U <sup>23</sup> | U <sup>13</sup> | U <sup>12</sup> |
|-------|-----------------|-----------------|-----------------|-----------------|-----------------|-----------------|
| C(1)  | 50(1)           | 45(1)           | 38(1)           | -4(1)           | 9(1)            | 4(1)            |
| C(2)  | 55(1)           | 44(1)           | 38(1)           | -6(1)           | 5(1)            | 3(1)            |
| C(3)  | 58(1)           | 64(2)           | 88(2)           | -1(1)           | 3(1)            | 22(1)           |
| C(4)  | 57(2)           | 143(3)          | 216(4)          | 73(3)           | 24(2)           | 24(2)           |
| C(5)  | 47(1)           | 48(1)           | 38(1)           | -3(1)           | 9(1)            | 3(1)            |
| C(6)  | 54(1)           | 58(1)           | 48(1)           | -7(1)           | 16(1)           | 1(1)            |
| C(7)  | 51(1)           | 135(3)          | 103(2)          | -27(2)          | 23(2)           | 25(2)           |
| C(8)  | 55(2)           | 213(5)          | 169(4)          | -87(4)          | 5(2)            | 25(2)           |
| C(9)  | 52(1)           | 43(1)           | 41(1)           | -9(1)           | 11(1)           | 6(1)            |
| C(10) | 71(1)           | 58(1)           | 45(1)           | -2(1)           | 14(1)           | -6(1)           |
| C(11) | 88(2)           | 84(2)           | 40(1)           | -4(1)           | 9(1)            | -6(2)           |
| C(12) | 71(2)           | 90(2)           | 56(2)           | -26(1)          | 10(1)           | -10(1)          |
| C(13) | 71(2)           | 65(2)           | 68(2)           | -22(1)          | 26(1)           | -15(1)          |
| C(14) | 64(1)           | 49(1)           | 49(1)           | -6(1)           | 20(1)           | 2(1)            |
| C(15) | 46(1)           | 45(1)           | 44(1)           | -6(1)           | 8(1)            | 4(1)            |
| C(16) | 61(1)           | 59(1)           | 44(1)           | -5(1)           | 9(1)            | -3(1)           |
| C(17) | 70(2)           | 78(2)           | 54(1)           | -14(1)          | 0(1)            | -1(1)           |
| C(18) | 67(2)           | 79(2)           | 83(2)           | -29(2)          | 6(1)            | -18(1)          |
| C(19) | 82(2)           | 66(2)           | 92(2)           | -9(2)           | 31(2)           | -25(1)          |
| C(20) | 68(1)           | 55(1)           | 54(1)           | 2(1)            | 14(1)           | -5(1)           |
| N(1)  | 50(1)           | 46(1)           | 42(1)           | -1(1)           | 6(1)            | 9(1)            |
| N(2)  | 43(1)           | 52(1)           | 39(1)           | -4(1)           | 9(1)            | 3(1)            |
| O(1)  | 48(1)           | 80(1)           | 57(1)           | -17(1)          | 18(1)           | 4(1)            |
| O(2)  | 79(1)           | 124(2)          | 51(1)           | -9(1)           | 28(1)           | 11(1)           |
| O(3)  | 47(1)           | 74(1)           | 57(1)           | -8(1)           | 13(1)           | 14(1)           |
| O(4)  | 68(1)           | 54(1)           | 67(1)           | -3(1)           | -1(1)           | 22(1)           |
| O(5)  | 73(1)           | 46(1)           | 63(1)           | 6(1)            | 3(1)            | -1(1)           |
| O(6)  | 50(1)           | 47(1)           | 65(1)           | 1(1)            | 8(1)            | 10(1)           |

Table 11. Hydrogen coordinates ( x 10<sup>4</sup>) and isotropic displacement parameters (Å<sup>2</sup>x 10<sup>-3</sup>) for mo\_140816\_0m\_a.

---

|       | x     | y    | z    | U(eq) |
|-------|-------|------|------|-------|
| H(3A) | 5983  | 1304 | 6429 | 88    |
| H(3B) | 5943  | 728  | 5520 | 88    |
| H(4A) | 7092  | 2235 | 5247 | 212   |
| H(4B) | 7716  | 1656 | 6147 | 212   |
| H(4C) | 7061  | 2913 | 6104 | 212   |
| H(7A) | -1342 | 2843 | 4544 | 115   |
| H(7B) | -1162 | 4204 | 4282 | 115   |
| H(8A) | -1823 | 3627 | 2845 | 225   |
| H(8B) | -2782 | 3491 | 3353 | 225   |
| H(8C) | -2115 | 2331 | 3156 | 225   |
| H(10) | 3726  | 3120 | 6876 | 70    |
| H(11) | 5158  | 3850 | 8053 | 87    |
| H(12) | 6298  | 5497 | 7891 | 88    |
| H(13) | 5958  | 6493 | 6583 | 80    |
| H(14) | 4499  | 5806 | 5408 | 64    |
| H(16) | 995   | 1716 | 2155 | 67    |
| H(17) | -674  | 729  | 1359 | 84    |
| H(18) | -1682 | -546 | 2033 | 95    |
| H(19) | -1060 | -869 | 3495 | 94    |
| H(20) | 594   | 138  | 4317 | 71    |

---



Current Data Parameters  
NAME RKS-2-155  
EXPNO 1  
PROCNO 1

F2 - Acquisition Parameters  
Date\_ 20140925  
Time 14.16  
INSTRUM spect  
PROBHD 5 mm QNP 1H/1  
PULPROG zg  
TD 33556  
SOLVENT CDCl3  
NS 16  
DS 0  
SWH 8389.262 Hz  
FIDRES 0.250008 Hz  
AQ 1.9999876 sec  
RG 128  
DW 59.600 usec  
DE 6.50 usec  
TE 303.8 K  
D1 2.0000000 sec  
MCREST 0.0000000 sec  
MCMRK 0.01500000 sec

===== CHANNEL f1 =====  
NUC1 1H  
P1 10.00 usec  
PL1 0.00 dB  
SFO1 598.7029935 MHz

F2 - Processing parameters  
SI 32768  
SF 598.7000255 MHz  
WDW EM  
SSB 0  
LB 0.40 Hz  
GB 0  
PC 1.00

1D NMR plot parameters  
CX 20.00 cm  
CY 10.00 cm  
F1P 10.000 ppm  
F1 5987.00 Hz  
F2P -0.500 ppm  
F2 -299.35 Hz  
PPMCM 0.52500 ppm/cm  
HZCM 314.31750 Hz/cm

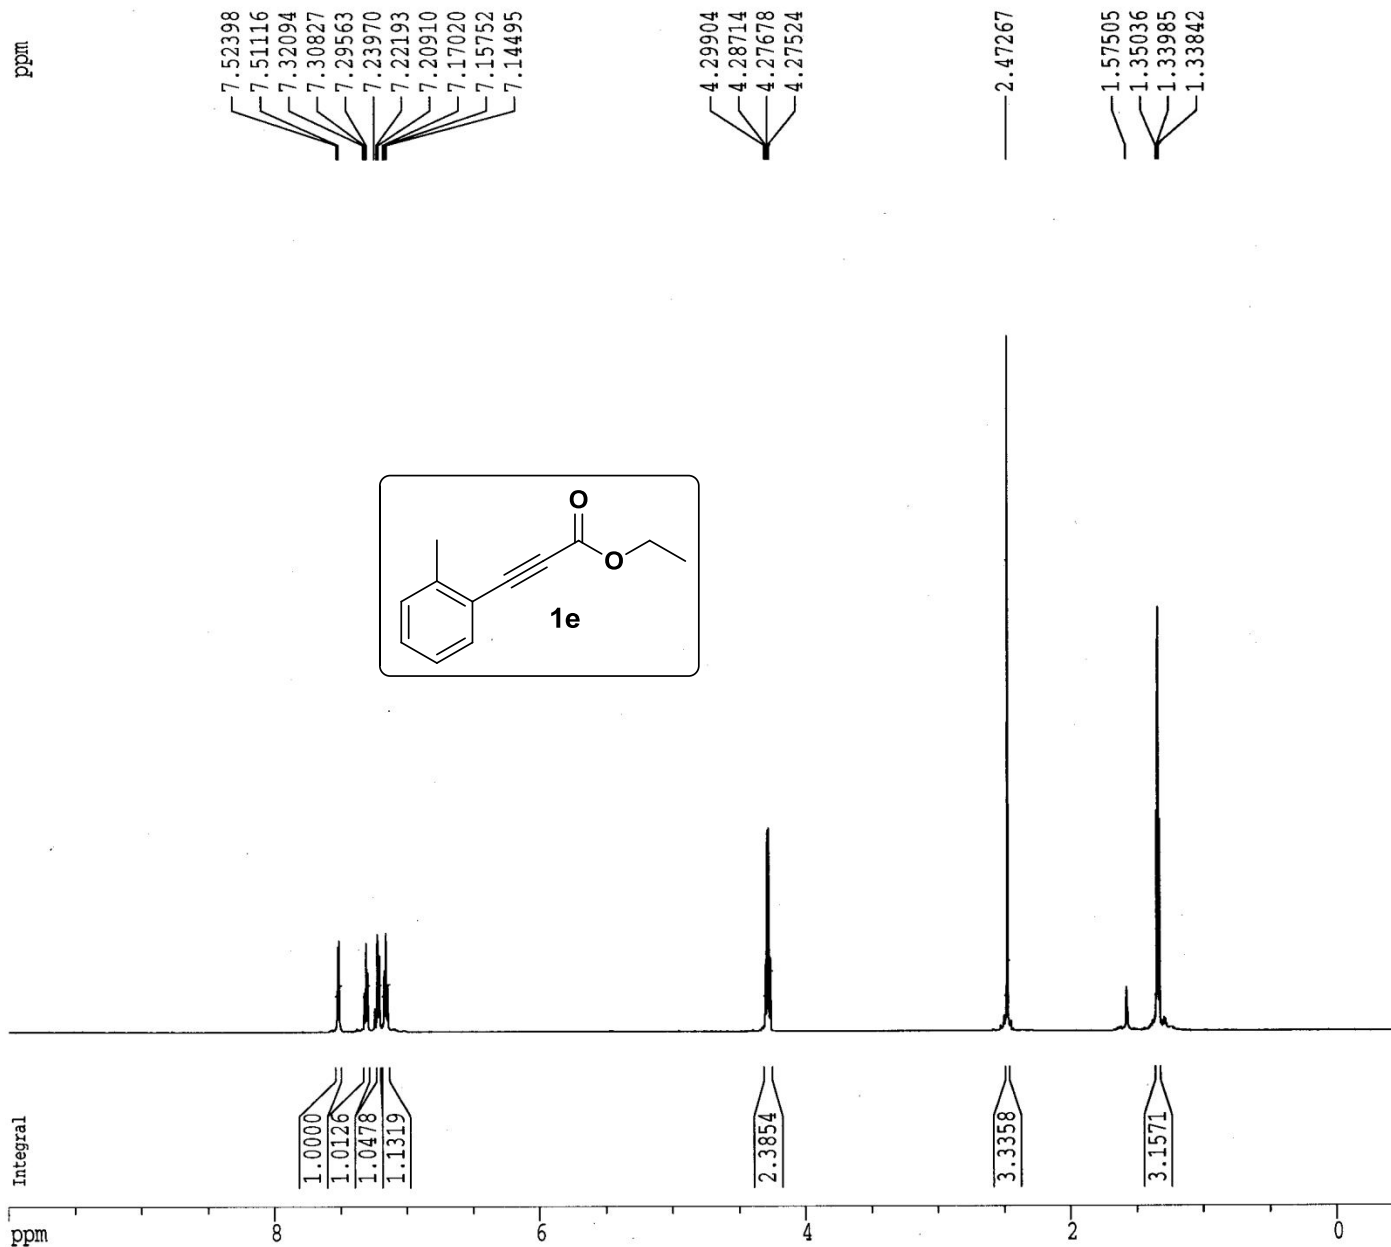

Current Data Parameters  
NAME RKS-2-155  
EXPNO 2  
PROCNO 1

F2 - Acquisition Parameters  
Date\_ 20140925  
Time 14.36  
INSTRUM spect  
PROBHD 5 mm QNP 1H/1  
PULPROG zgpg  
TD 32768  
SOLVENT CDCl3  
NS 300  
DS 0  
SWH 45045.047 Hz  
FIDRES 1.374666 Hz  
AQ 0.3637748 sec  
RG 2048  
DW 11.100 usec  
DE 6.50 usec  
TE 305.7 K  
D1 3.5000000 sec  
d11 0.0300000 sec  
DELTA 3.4000010 sec  
MCREST 0.0000000 sec  
MCWRK 0.0150000 sec

===== CHANNEL f1 =====  
NUC1 13C  
P1 4.80 usec  
PL1 0.00 dB  
SFO1 150.5597948 MHz

===== CHANNEL f2 =====  
CPDPRG2 waltz16  
NUC2 1H  
PCPD2 92.00 usec  
PL2 120.00 dB  
PL12 9.00 dB  
PL13 14.00 dB  
SFO2 598.7029935 MHz

F2 - Processing parameters  
SI 65536  
SF 150.5432363 MHz  
WDW EM  
SSB 0  
LB 3.00 Hz  
GB 0  
PC 1.00

1D NMR plot parameters  
CX 20.00 cm  
CY 4.00 cm  
FIP 200.000 ppm  
F1 30108.65 Hz  
F2P 0.000 ppm  
F2 0.00 Hz  
PPMCM 10.00000 ppm/cm  
HZCM 1505.43237 Hz/cm

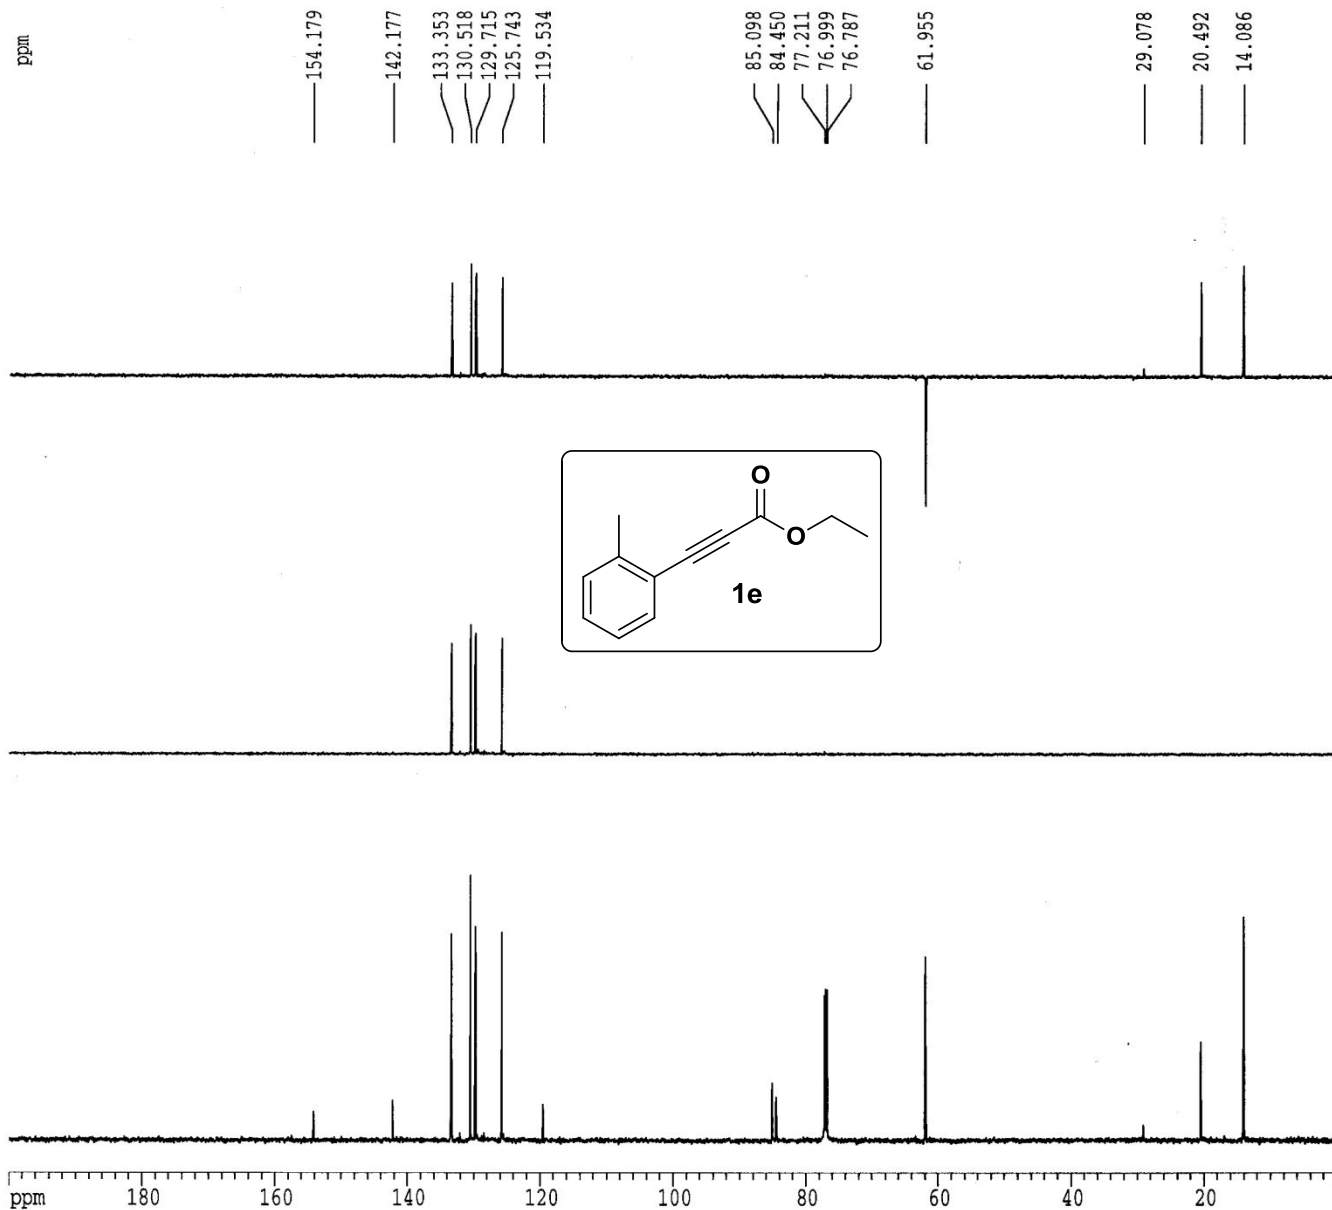

Current Data Parameters  
NAME RKS-1-147  
EXPNO 1  
PROCNO 1

F2 - Acquisition Parameters  
Date\_ 20130729  
Time 15.29  
INSTRUM spect  
PROBHD 5 mm QNP 1H/1  
PULPROG zg  
TD 32768  
SOLVENT CDCl3  
NS 16  
DS 0  
SWH 8382.229 Hz  
FIDRES 0.255805 Hz  
AQ 1.9546613 sec  
RG 256  
DW 59.650 usec  
DE 6.50 usec  
TE 300.9 K  
D1 1.00000000 sec  
MCREST 0.00000000 sec  
MCWRK 0.01500000 sec

===== CHANNEL f1 =====  
NUC1 1H  
P1 10.00 usec  
PL1 0.00 dB  
SFOL 598.8026946 MHz

F2 - Processing parameters  
SI 32768  
SF 598.8000284 MHz  
WDW no  
SSB 0  
LB 0.00 Hz  
GB 0  
PC 1.00

1D NMR plot parameters  
CX 20.00 cm  
CY 10.00 cm  
F1P 10.000 ppm  
F1 5988.00 Hz  
F2P -0.500 ppm  
F2 -299.40 Hz  
PPMCM 0.52500 ppm/cm  
HZCM 314.37003 Hz/cm

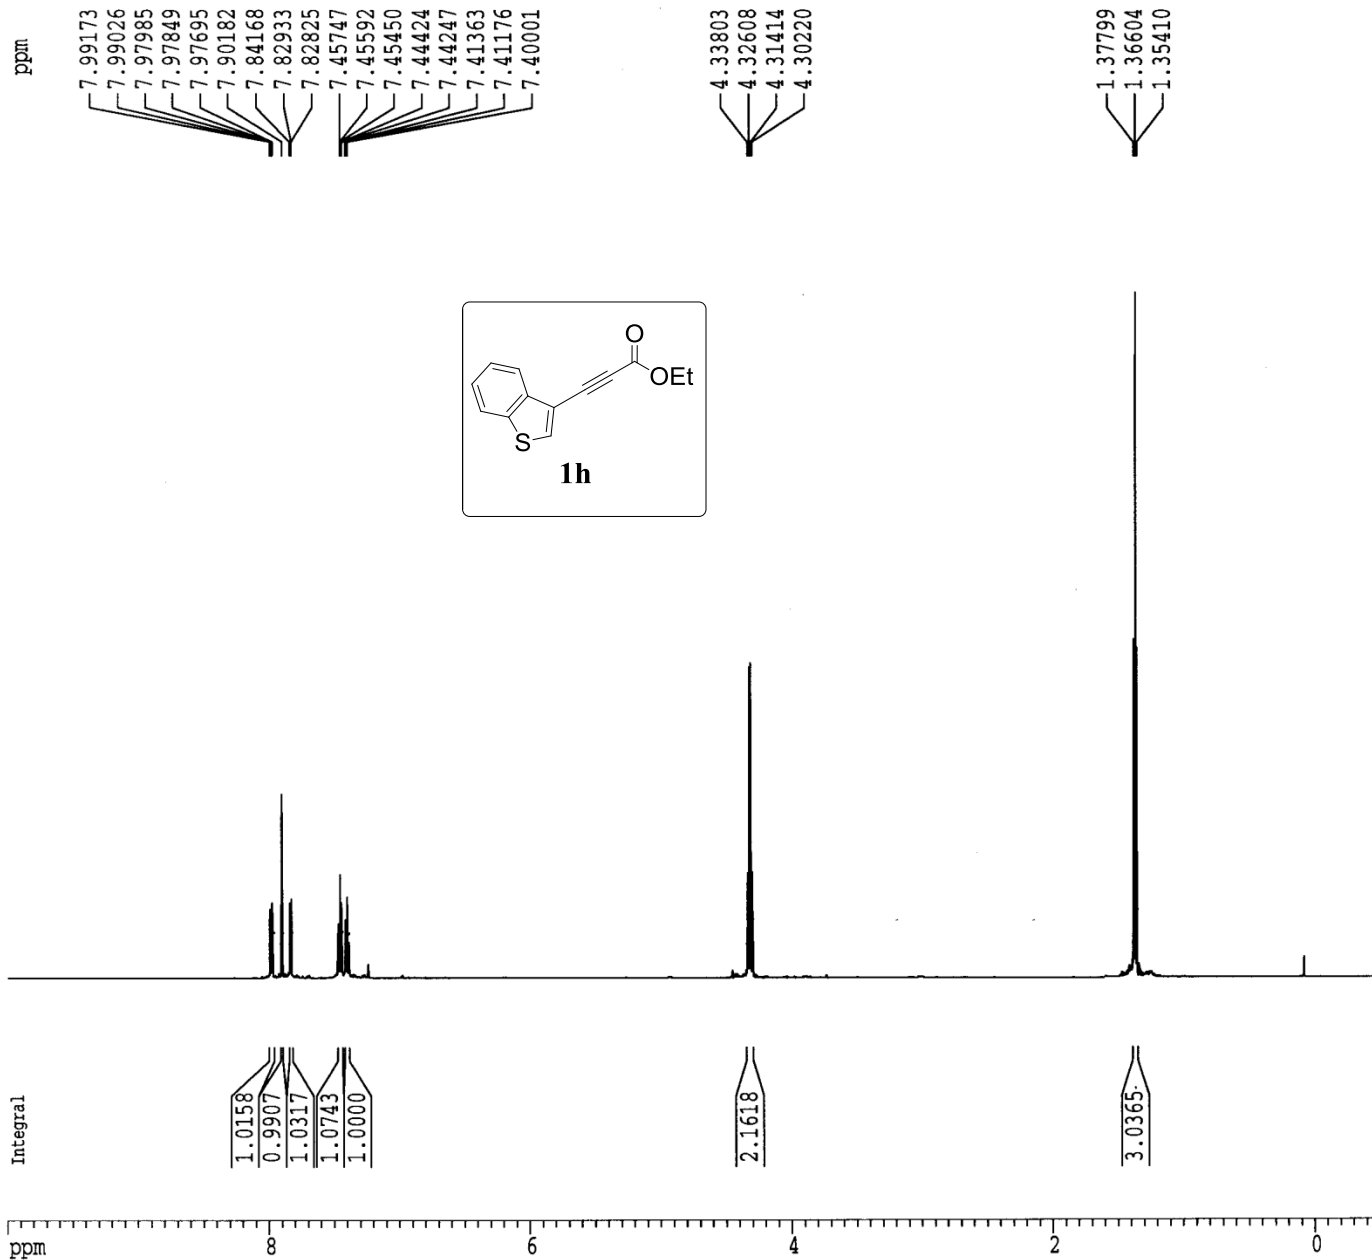

Current Data Parameters  
NAME RKS-1-147  
EXPNO 2  
PROCNO 1

F2 - Acquisition Parameters  
Date\_ 20130729  
Time 15.29  
INSTRUM spect  
PROBHD 5 mm QNP 1H/1  
PULPROG zgpg  
TD 32768  
SOLVENT CDC13  
NS 39  
DS 0  
SWH 45045.047 Hz  
FIDRES 1.374666 Hz  
AQ 0.3637748 sec  
RG 2048  
DW 11.100 usec  
DE 6.50 usec  
TE 300.9 K  
D1 3.50000000 sec  
d11 0.03000000 sec  
DELTA 3.40000010 sec  
MCREST 0.00000000 sec  
MCWRK 0.01500000 sec

=====  
CHANNEL f1  
NUC1 13C  
P1 4.80 usec  
PL1 0.00 dB  
SFO1 150.5849425 MHz

=====  
CHANNEL f2  
CPDPRG2 waltz16  
NUC2 1H  
PCPD2 92.00 usec  
PL2 120.00 dB  
PL12 9.00 dB  
PL13 14.00 dB  
SFO2 598.8029940 MHz

F2 - Processing parameters  
SI 65536  
SF 150.5683965 MHz  
WDW EM  
SSB 0  
LB 3.00 Hz  
GB 0  
PC 0.50

1D NMR plot parameters  
CX 20.00 cm  
CY 4.00 cm  
F1P 200.000 ppm  
F1 30113.68 Hz  
F2P 0.000 ppm  
F2 0.00 Hz  
PPMCM 10.00000 ppm/cm  
HZCM 1505.68384 Hz/cm

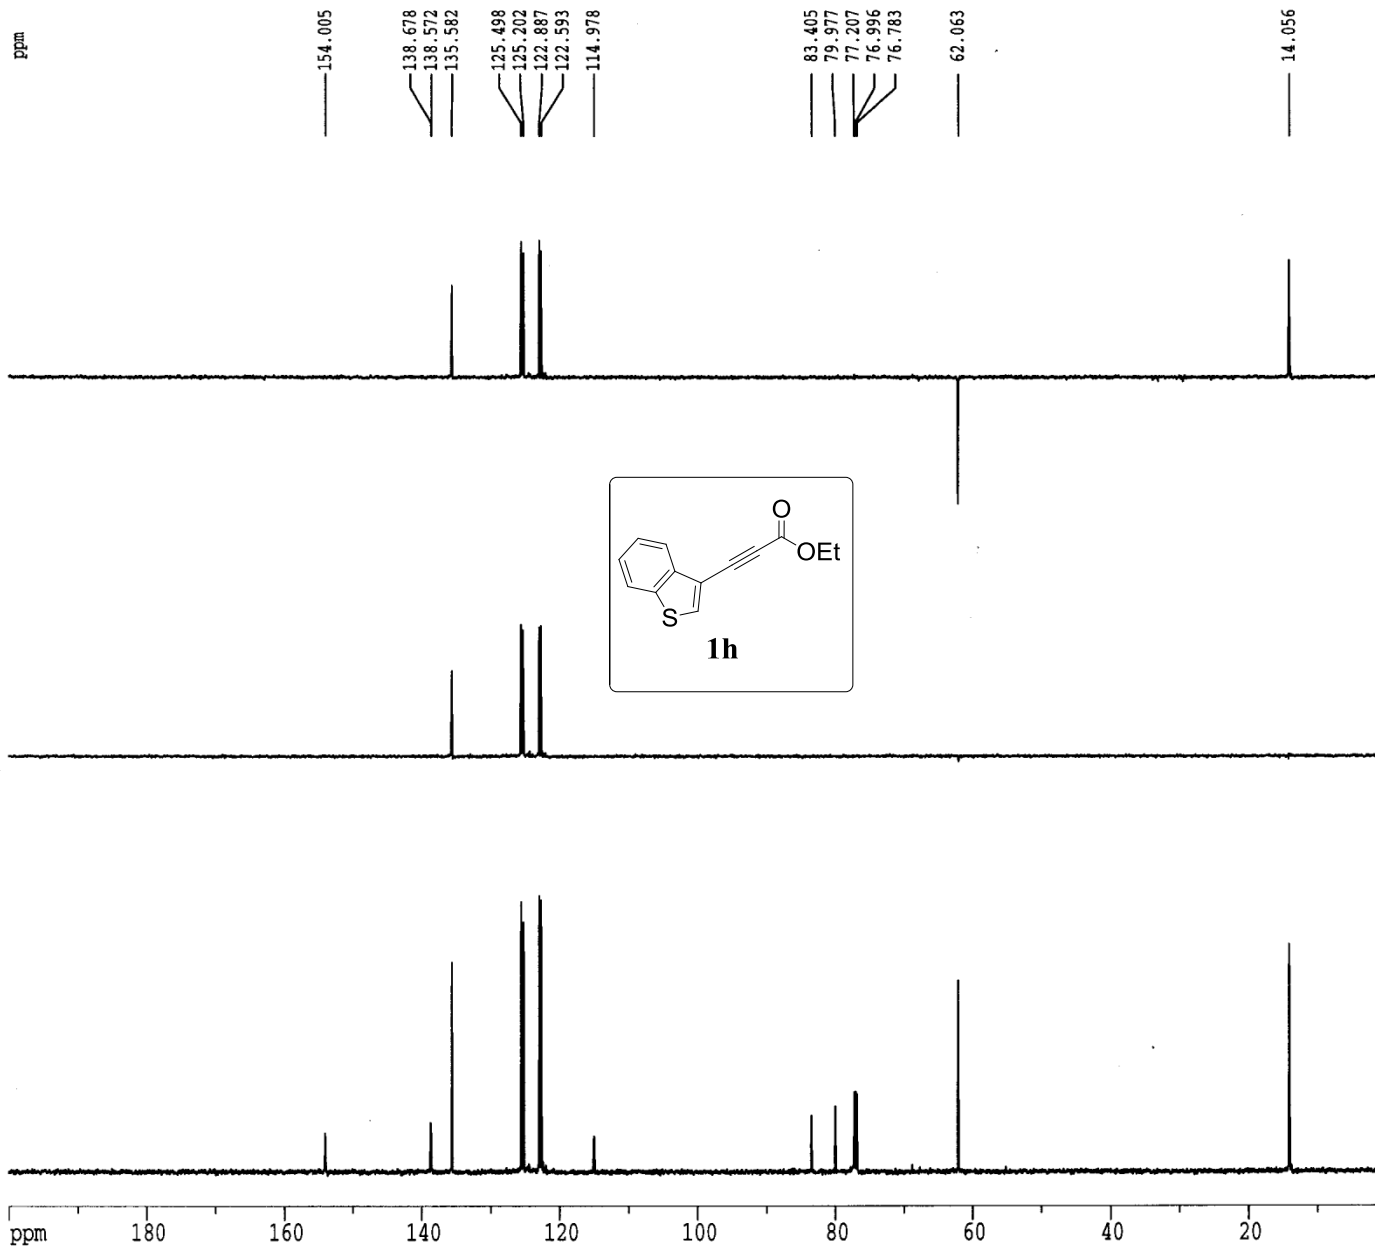

Current Data Parameters  
 NAME RKS-1-164  
 EXPNO 1  
 PROCNO 1

F2 - Acquisition Parameters  
 Date\_ 20130806  
 Time 21.42  
 INSTRUM spect  
 PROBHD 5 mm QNP 1H/1  
 PULPROG zg  
 TD 32768  
 SOLVENT CDCl3  
 NS 16  
 DS 0  
 SWH 8382.229 Hz  
 FIDRES 0.255805 Hz  
 AQ 1.9546613 sec  
 RG 32  
 DW 59.650 usec  
 DE 6.50 usec  
 TE 298.3 K  
 D1 2.00000000 sec  
 MCREST 0.00000000 sec  
 MCWRK 0.01500000 sec

===== CHANNEL f1 =====  
 NUC1 1H  
 P1 10.00 usec  
 PL1 0.00 dB  
 SF01 598.8026946 MHz

F2 - Processing parameters  
 SI 32768  
 SF 598.8000292 MHz  
 WDW EM  
 SSB 0  
 LB 1.00 Hz  
 GB 0  
 PC 1.00

1D NMR plot parameters  
 CX 20.00 cm  
 CY 10.00 cm  
 F1P 10.000 ppm  
 F1 5988.00 Hz  
 F2P -0.500 ppm  
 F2 -299.40 Hz  
 PPMCM 0.52500 ppm/cm  
 HZCM 314.37003 Hz/cm

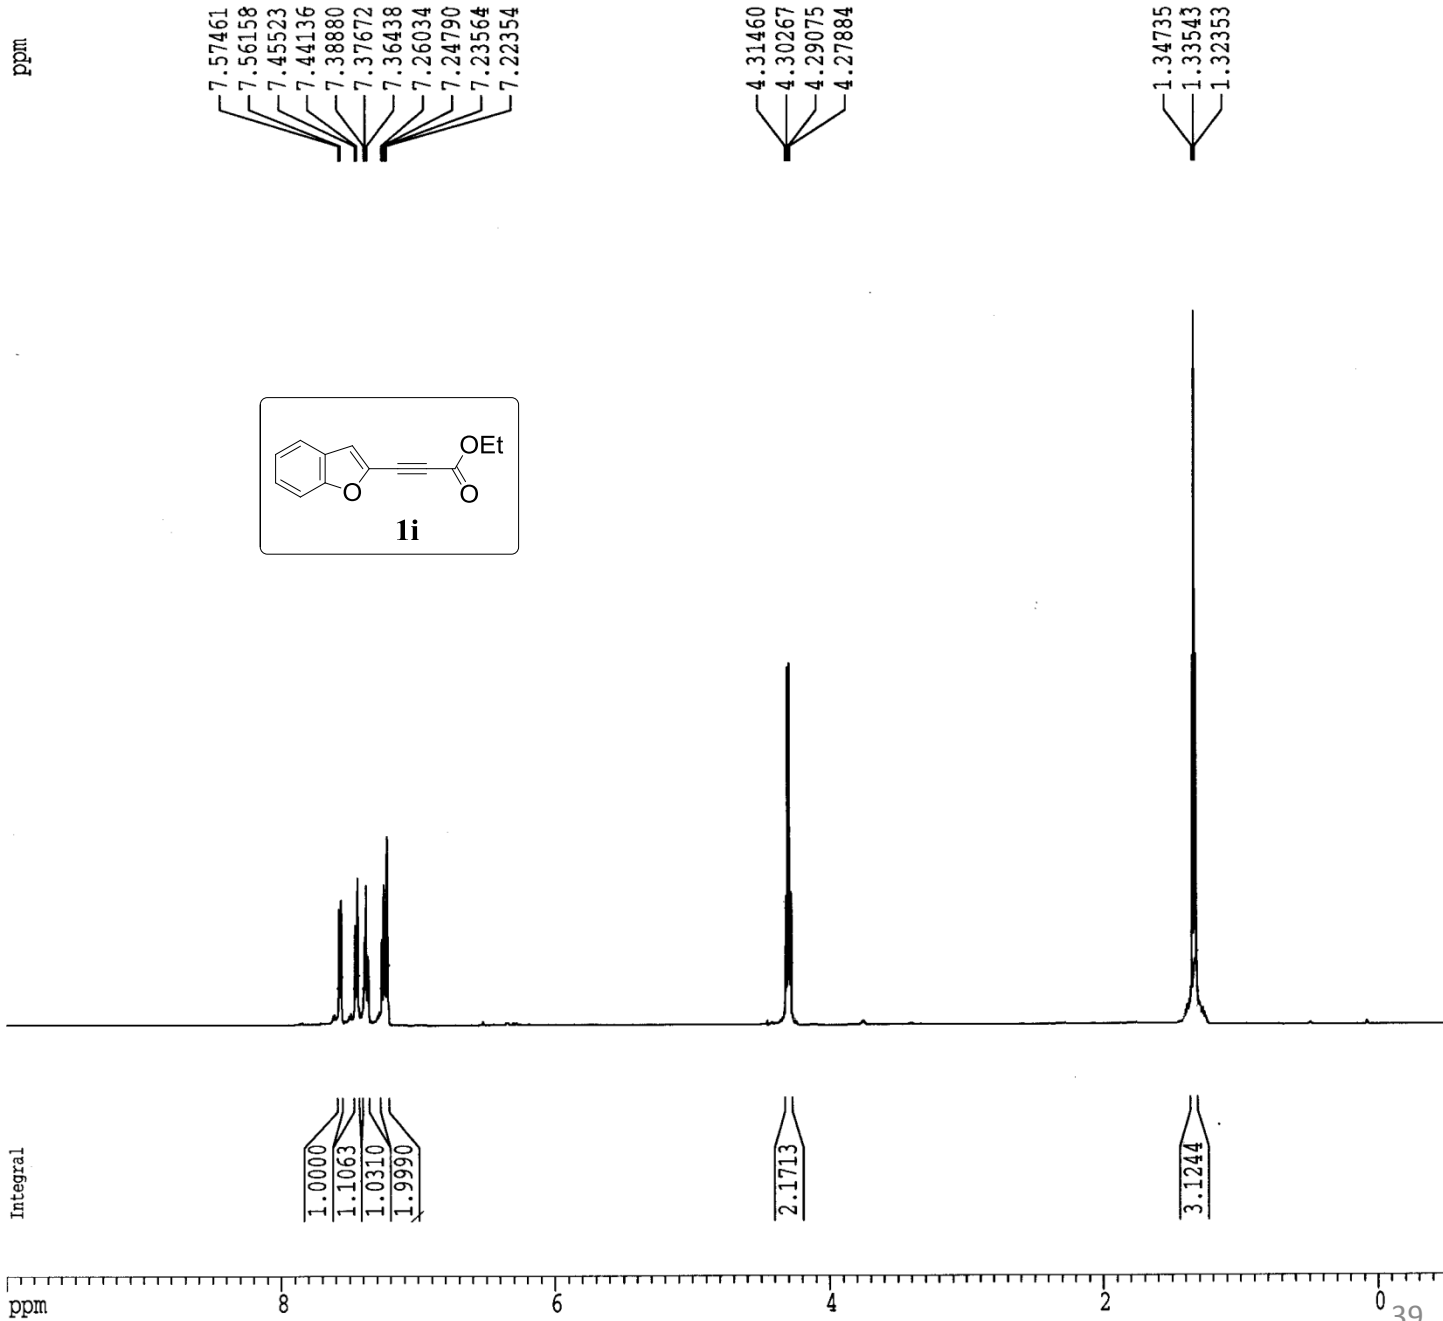

Current Data Parameters  
 NAME RKS-1-164  
 EXPNO 2  
 PROCNO 1

F2 - Acquisition Parameters

Date\_ 20130806  
 Time 21.45  
 INSTRUM spect  
 PROBHD 5 mm QNP 1H/1  
 PULPROG zgpg  
 TD 32768  
 SOLVENT CDCl3  
 NS 55  
 DS 0  
 SWH 45045.047 Hz  
 FIDRES 1.374666 Hz  
 AQ 0.3637748 sec  
 RG 2048  
 DW 11.100 usec  
 DE 6.50 usec  
 TE 299.4 K  
 D1 3.50000000 sec  
 d11 0.03000000 sec  
 DELTA 3.40000010 sec  
 MCREST 0.00000000 sec  
 MCWRK 0.01500000 sec

===== CHANNEL f1 =====  
 NUC1 13C  
 P1 4.80 usec  
 PL1 0.00 dB  
 SFO1 150.5849425 MHz

===== CHANNEL f2 =====  
 CPDPRG2 waltz16  
 NUC2 1H  
 PCPD2 92.00 usec  
 PL2 120.00 dB  
 PL12 9.00 dB  
 PL13 14.00 dB  
 SFO2 598.8029940 MHz

F2 - Processing parameters

SI 65536  
 SF 150.5683993 MHz  
 WDW EM  
 SSB 0  
 LB 3.00 Hz  
 GB 0  
 PC 0.50

1D NMR plot parameters

CX 20.00 cm  
 CY 4.00 cm  
 F1P 200.000 ppm  
 F1 30113.68 Hz  
 F2P 0.000 ppm  
 F2 0.00 Hz  
 PPMCM 10.00000 ppm/cm  
 HZCM 1505.68408 Hz/cm

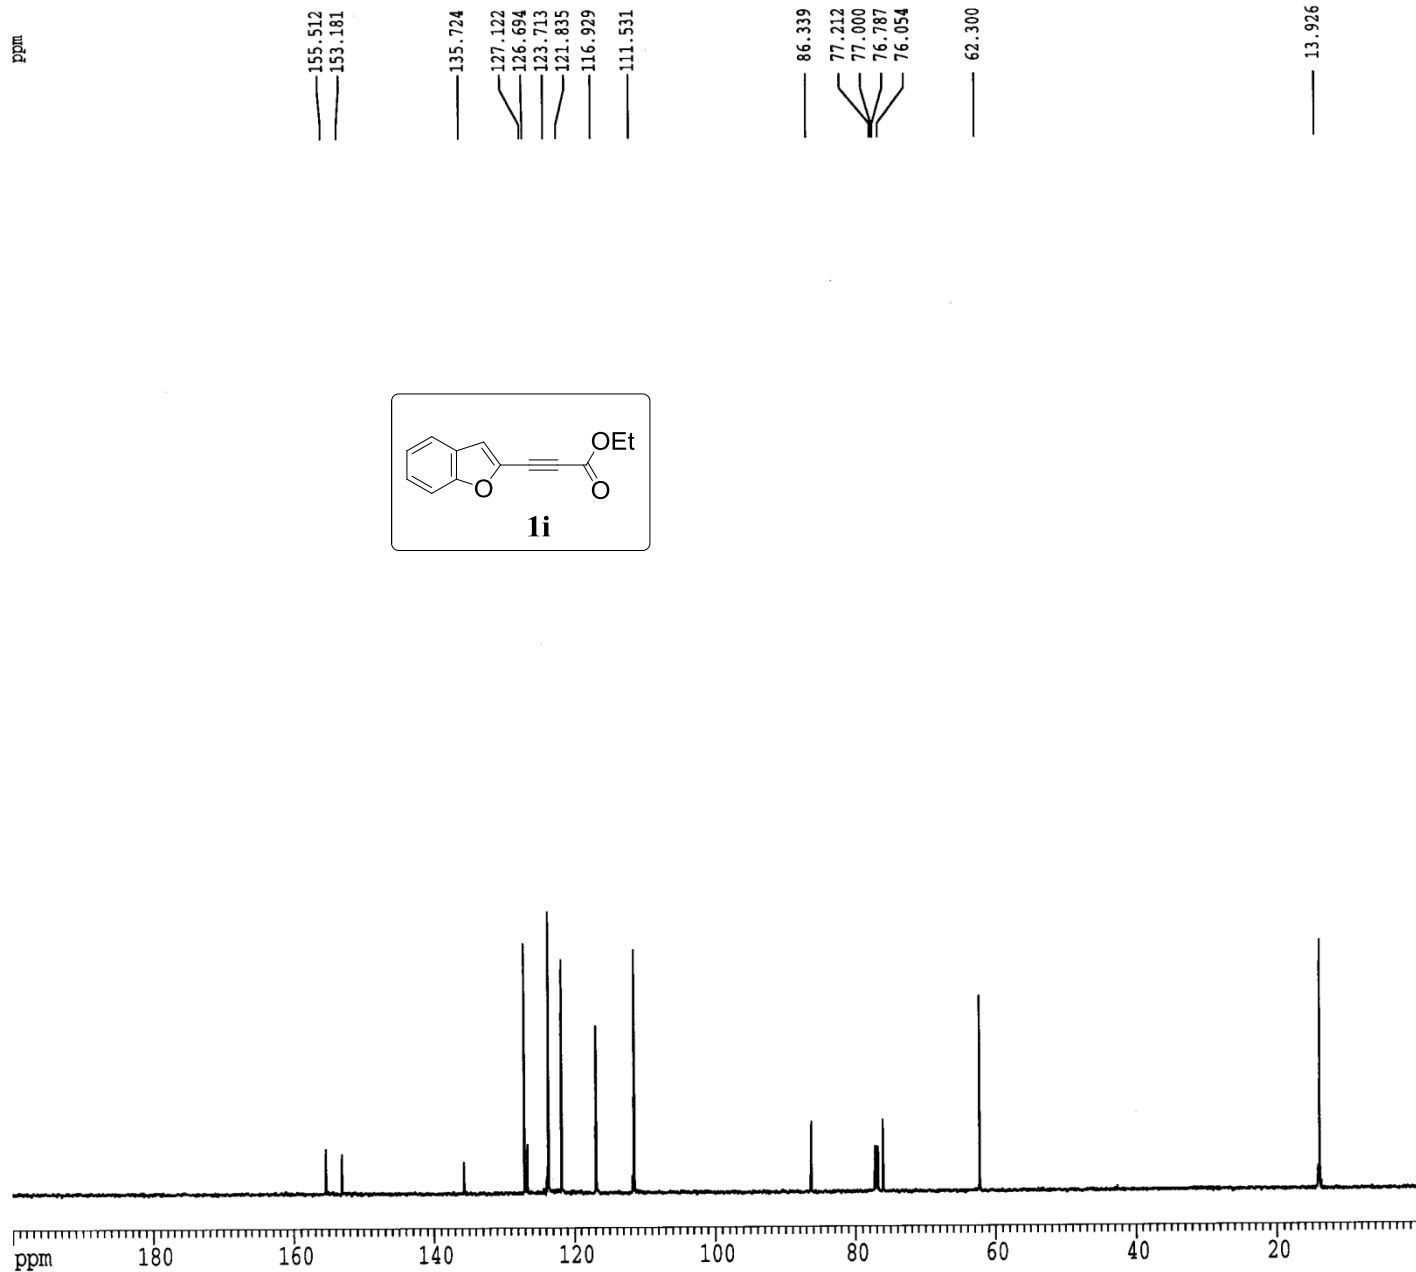

Current Data Parameters  
 NAME RKS-1-145  
 EXPNO 1  
 PROCNO 1

F2 - Acquisition Parameters

Date\_ 20130804  
 Time 17.22  
 INSTRUM spect  
 PROBHD 5 mm QNP 1H/1  
 PULPROG zg  
 TD 32768  
 SOLVENT CDCl3  
 NS 16  
 DS 0  
 SWH 8382.229 Hz  
 FIDRES 0.255805 Hz  
 AQ 1.9546613 sec  
 RG 128  
 DW 59.650 usec  
 DE 6.50 usec  
 TE 302.4 K  
 D1 2.00000000 sec  
 MCREST 0.00000000 sec  
 MCWRK 0.01500000 sec

==== CHANNEL f1 =====  
 NUC1 1H  
 P1 10.00 usec  
 PL1 0.00 dB  
 SFO1 598.8029940 MHz

F2 - Processing parameters  
 SI 32768  
 SF 598.8000301 MHz  
 WDW no  
 SSB 0  
 LB 0.00 Hz  
 GB 0  
 PC 1.00

1D NMR plot parameters  
 CX 20.00 cm  
 CY 8.00 cm  
 F1P 10.000 ppm  
 F1 5988.00 Hz  
 F2P -0.500 ppm  
 F2 -299.40 Hz  
 PPMCM 0.52500 ppm/cm  
 HZCM 314.37003 Hz/cm

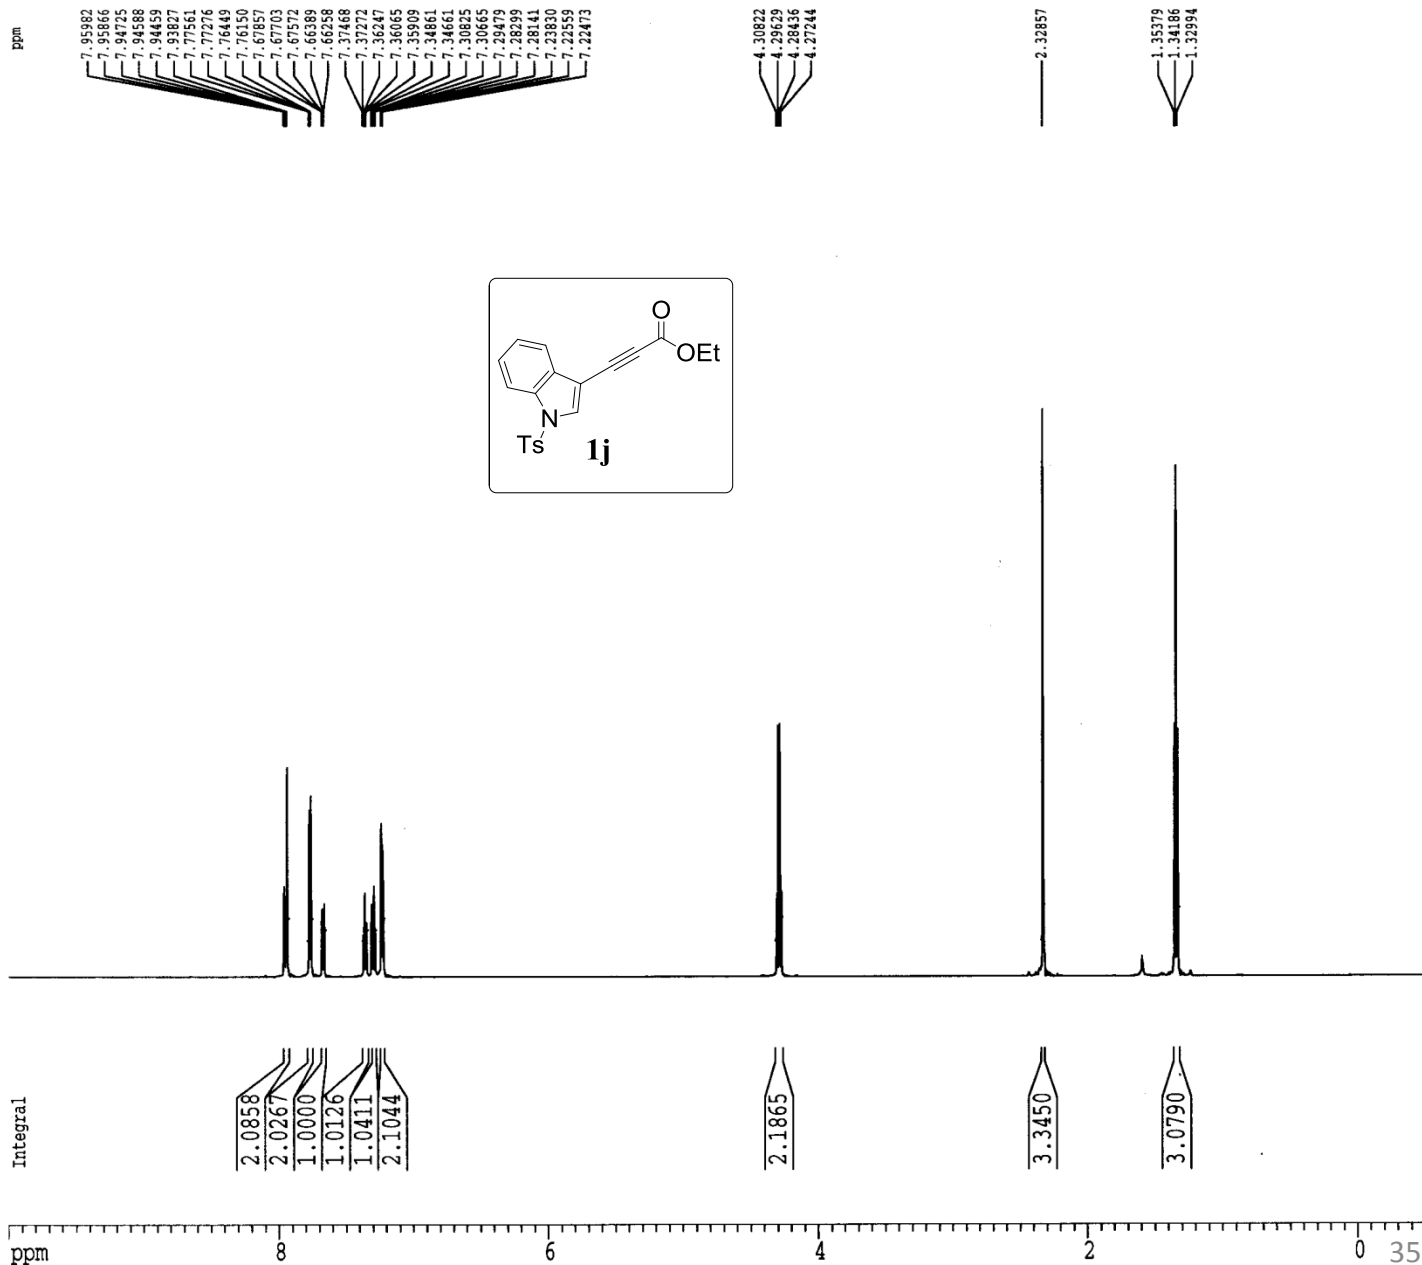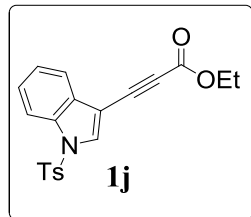

Current Data Parameters  
NAME RKS-1-145  
EXPNO 2  
PROCNO 1

F2 - Acquisition Parameters  
Date\_ 20130804  
Time 17.23  
INSTRUM spect  
PROBHD 5 mm QNP 1H/1  
PULPROG zgpg  
TD 32768  
SOLVENT CDCl3  
NS 46  
DS 0  
SWH 45045.047 Hz  
FIDRES 1.374666 Hz  
AQ 0.3637748 sec  
RG 2048  
DW 11.100 usec  
DE 6.50 usec  
TE 302.4 K  
D1 3.50000000 sec  
d11 0.03000000 sec  
DELTA 3.40000010 sec  
MCREST 0.00000000 sec  
MCWRK 0.01500000 sec

===== CHANNEL f1 =====  
NUC1 13C  
P1 4.80 usec  
PL1 0.00 dB  
SFO1 150.5849425 MHz

===== CHANNEL f2 =====  
CPDPRG2 waltz16  
NUC2 1H  
PCPD2 92.00 usec  
PL2 120.00 dB  
PL12 9.00 dB  
PL13 14.00 dB  
SFO2 598.8029940 MHz

F2 - Processing parameters  
SI 65536  
SF 150.5683862 MHz  
WDW EM  
SSB 0  
LB 3.00 Hz  
GB 0  
PC 0.50

1D NMR plot parameters  
CX 20.00 cm  
CY 4.00 cm  
F1P 200.000 ppm  
F1 30113.68 Hz  
F2P 0.000 ppm  
F2 0.00 Hz  
PPMCM 10.00000 ppm/cm  
HZCM 1505.68384 Hz/cm

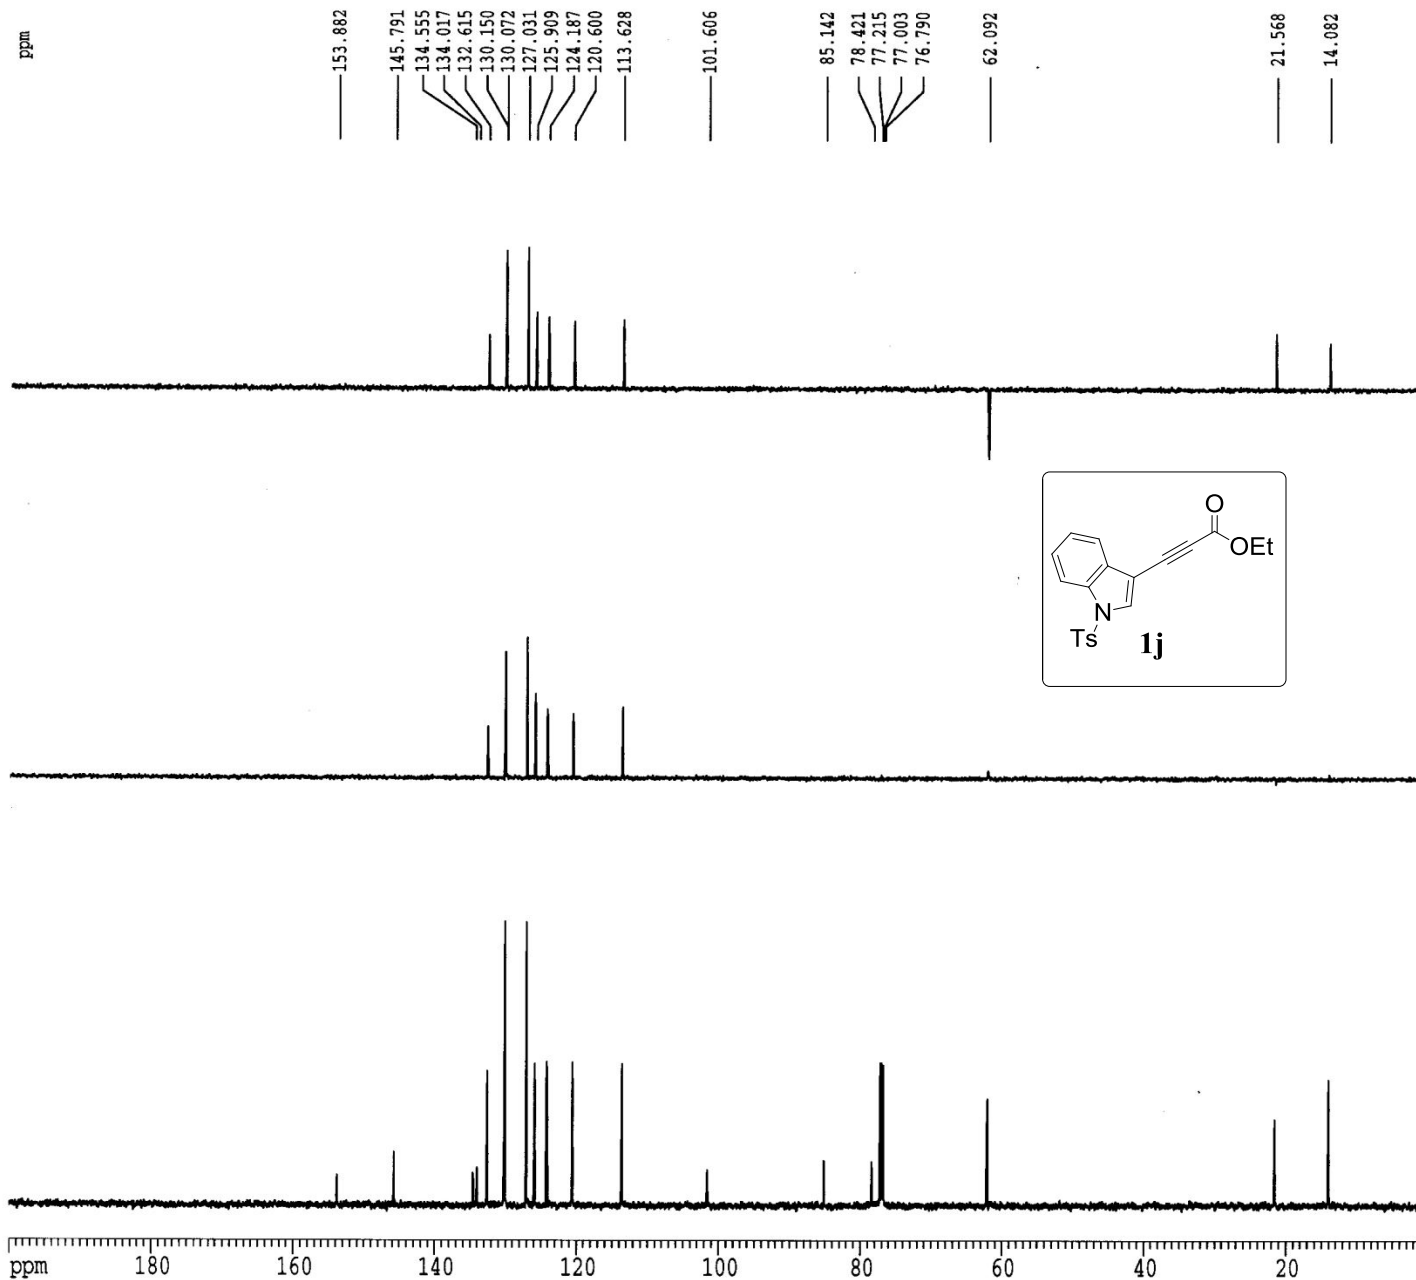



Current Data Parameters  
NAME RKS-1-1-106  
EXPNO 1  
PROCNO 1

F2 - Acquisition Parameters

Date\_ 20130612  
Time 19.46  
INSTRUM spect  
PROBHD 5 mm QNP 1H/1  
PULPROG zg  
TD 32768  
SOLVENT CDCl3  
NS 16  
DS 0  
SWH 8382.229 Hz  
FIDRES 0.255805 Hz  
AQ 1.9546613 sec  
RG 32  
DW 59.650 usec  
DE 6.50 usec  
TE 299.6 K  
D1 1.00000000 sec  
MCREST 0.00000000 sec  
MCWRK 0.01500000 sec

===== CHANNEL f1 =====  
NUC1 1H  
P1 10.00 usec  
PL1 0.00 dB  
SFO1 598.8026946 MHz

F2 - Processing parameters

SI 32768  
SF 598.8000284 MHz  
WDW no  
SSB 0  
LB 0.00 Hz  
GB 0  
PC 1.00

1D NMR plot parameters  
CX 20.00 cm  
CY 10.00 cm  
F1P 10.000 ppm  
F1 5988.00 Hz  
F2P -0.500 ppm  
F2 -299.40 Hz  
PPMCM 0.52500 ppm/cm  
HZCM 314.37003 Hz/cm

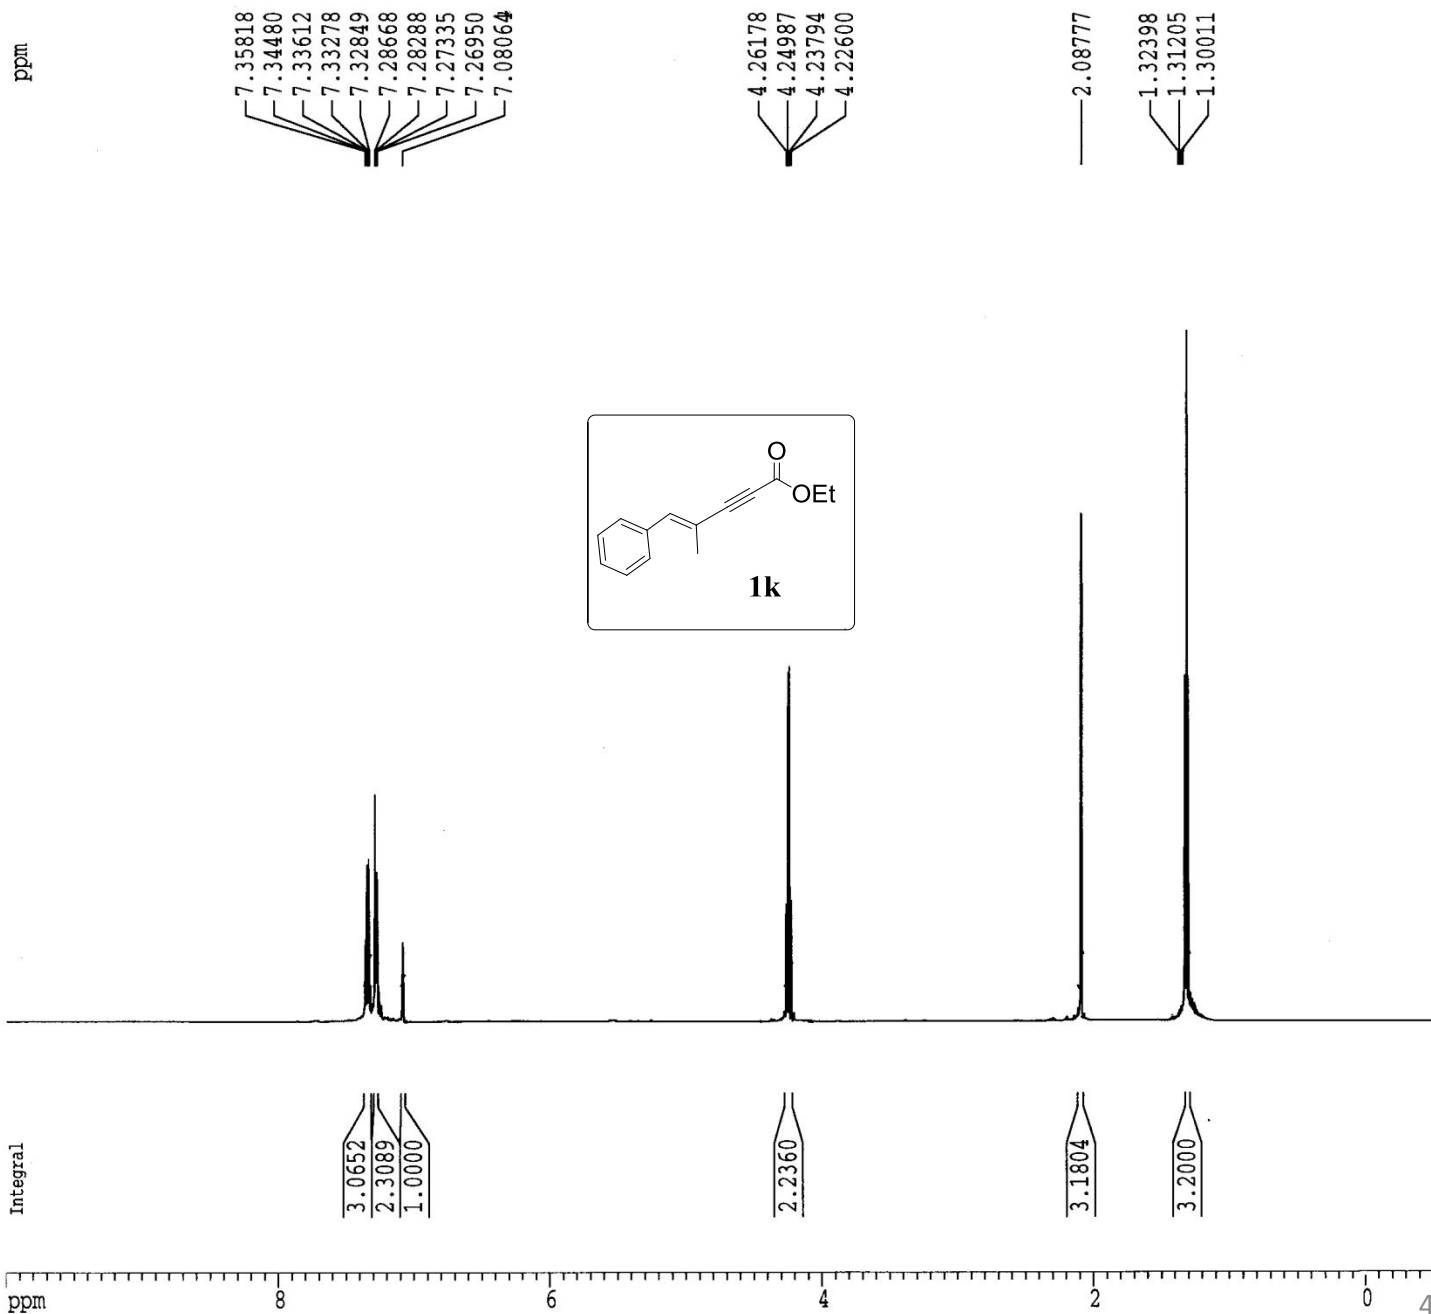

Current Data Parameters  
NAME RKS-1-1-106  
EXPNO 2  
PROCNO 1

F2 - Acquisition Parameters

Date\_ 20130612  
Time 19.51  
INSTRUM spect  
PROBHD 5 mm QNP 1H/1  
PULPROG zgpg  
TD 32768  
SOLVENT CDCl3  
NS 65  
DS 0  
SWH 45045.047 Hz  
FIDRES 1.374666 Hz  
AQ 0.3637748 sec  
RG 2048  
DW 11.100 usec  
DE 6.50 usec  
TE 300.4 K  
D1 3.50000000 sec  
d11 0.03000000 sec  
DELTA 3.40000010 sec  
MCREST 0.00000000 sec  
MCWRK 0.01500000 sec

===== CHANNEL f1 =====  
NUC1 13C  
P1 4.80 usec  
PL1 0.00 dB  
SFO1 150.5849425 MHz

===== CHANNEL f2 =====  
CPDPRG2 waltz16  
NUC2 1H  
PCPD2 92.00 usec  
PL2 120.00 dB  
PL12 9.00 dB  
PL13 14.00 dB  
SFO2 598.8029940 MHz

F2 - Processing parameters  
SI 65536  
SF 150.5684034 MHz  
WDW EM  
SSB 0  
LB 3.00 Hz  
GB 0  
PC 0.50

1D NMR plot parameters  
CX 20.00 cm  
CY 5.00 cm  
F1P 200.000 ppm  
F1 30113.68 Hz  
F2P 0.000 ppm  
F2 0.00 Hz  
PPMCM 10.00000 ppm/cm  
HZCM 1505.68408 Hz/cm

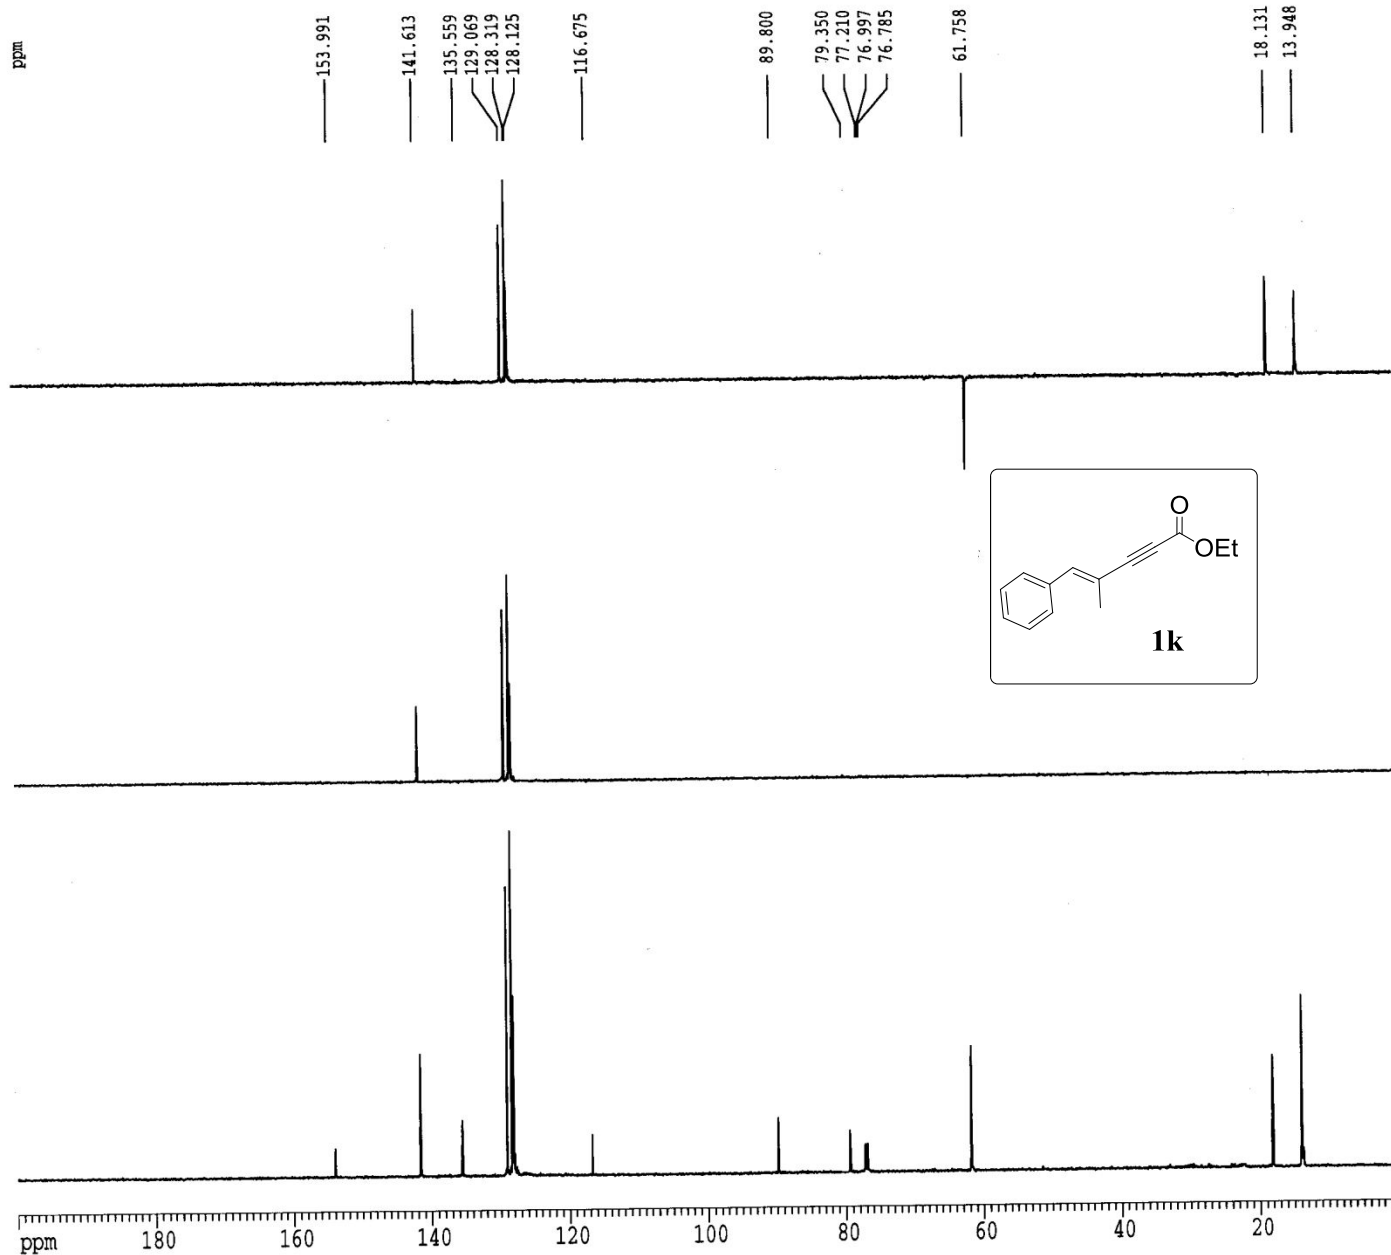

7.8930  
7.5256  
7.5197  
7.5084  
7.5067  
7.4953  
7.4899  
7.4697  
7.4587  
7.4543  
7.4479  
7.4431  
7.4313  
7.4242  
7.4185  
7.4060  
7.4035  
7.3833  
7.3676  
7.3635  
7.3452  
7.3250  
7.3057  
7.2397  
7.1732  
7.1545  
7.1361  
7.0866  
7.0822  
7.0773  
7.0740  
7.0687  
7.0650  
7.0588  
7.0558

3.9155  
3.8978  
3.8801  
3.8623

1.5510

0.9554  
0.9373  
0.9195

Current Data Parameters  
NAME 20140820  
EXPNO 1  
PROCNO 1

F2 - Acquisition Parameters  
Date\_ 20140820  
Time 23.12  
INSTRUM spect  
PROBHD 5 mm DUL 13C-1  
PULPROG zg30  
TD 32768  
SOLVENT CDCl3  
NS 23  
DS 0  
SWH 6410.256 Hz  
FIDRES 0.195625 Hz  
AQ 2.5559540 sec  
RG 287  
DW 78.000 usec  
DE 6.00 usec  
TE 300.0 K  
D1 2.00000000 sec  
TDO 1

----- CHANNEL f1 -----  
NUC1 1H  
P1 10.00 usec  
PL1 -2.40 dB  
SFO1 400.1528010 MHz

F2 - Processing parameters  
SI 16384  
SF 400.1500175 MHz  
WDW EM  
SSB 0  
LB 0.00 Hz  
GB 0  
PC 1.00

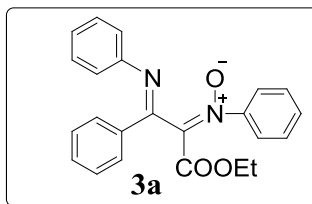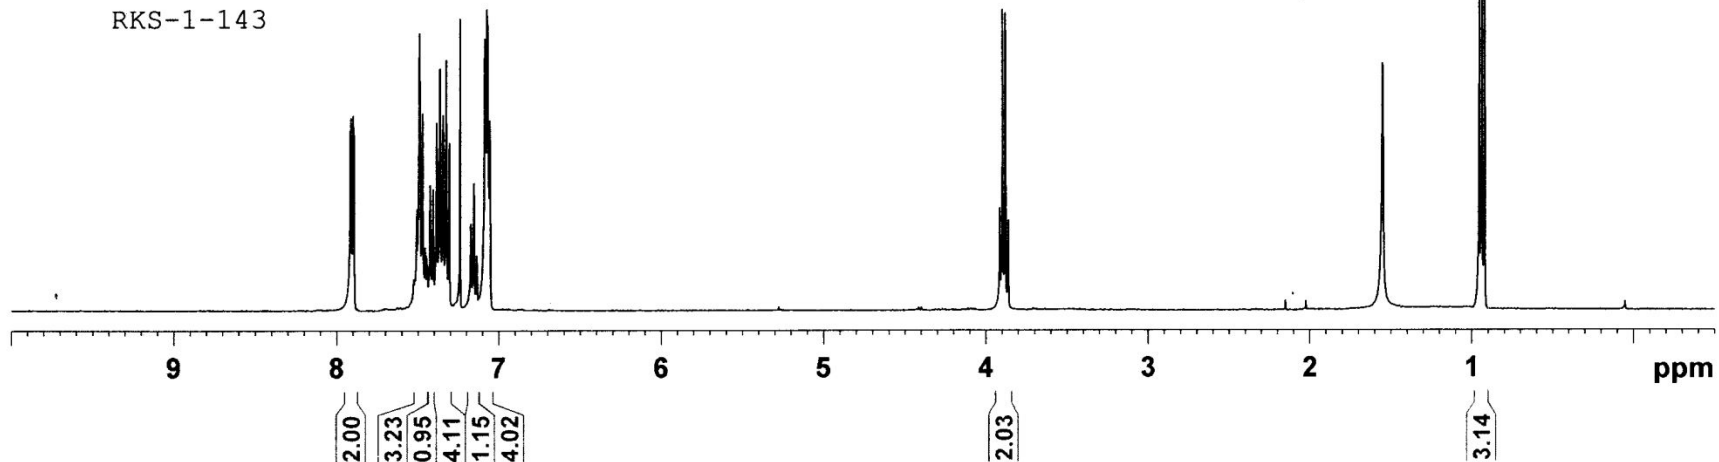

Current Data Parameters  
 NAME RKS-1-143  
 EXPNO 2  
 PROCNO 1

F2 - Acquisition Parameters

Date\_ 20130723  
 Time 20.52  
 INSTRUM spect  
 PROBHD 5 mm QNP 1H/1  
 PULPROG zgpg  
 TD 32768  
 SOLVENT CDCl3  
 NS 100  
 DS 0  
 SWH 45045.047 Hz  
 FIDRES 1.374666 Hz  
 AQ 0.3637748 sec  
 RG 2048  
 DW 11.100 usec  
 DE 6.50 usec  
 TE 302.4 K  
 D1 3.50000000 sec  
 d11 0.03000000 sec  
 DELTA 3.40000010 sec  
 MCREST 0.00000000 sec  
 MCWRK 0.01500000 sec

==== CHANNEL f1 =====  
 NUC1 13C  
 P1 4.80 usec  
 PL1 0.00 dB  
 SFO1 150.5849425 MHz

==== CHANNEL f2 =====  
 CPDPRG2 waltz16  
 NUC2 1H  
 PCPD2 92.00 usec  
 PL2 120.00 dB  
 PL12 9.00 dB  
 PL13 14.00 dB  
 SFO2 598.8029940 MHz

F2 - Processing parameters  
 SI 65536  
 SF 150.5683910 MHz  
 WDW EM  
 SSB 0  
 LB 3.00 Hz  
 GB 0  
 PC 0.50

1D NMR plot parameters  
 CX 20.00 cm  
 CY 4.00 cm  
 FIP 200.000 ppm  
 F1 30113.68 Hz  
 F2P 0.000 ppm  
 F2 0.00 Hz  
 PPMCM 10.00000 ppm/cm  
 HZCM 1505.68384 Hz/cm

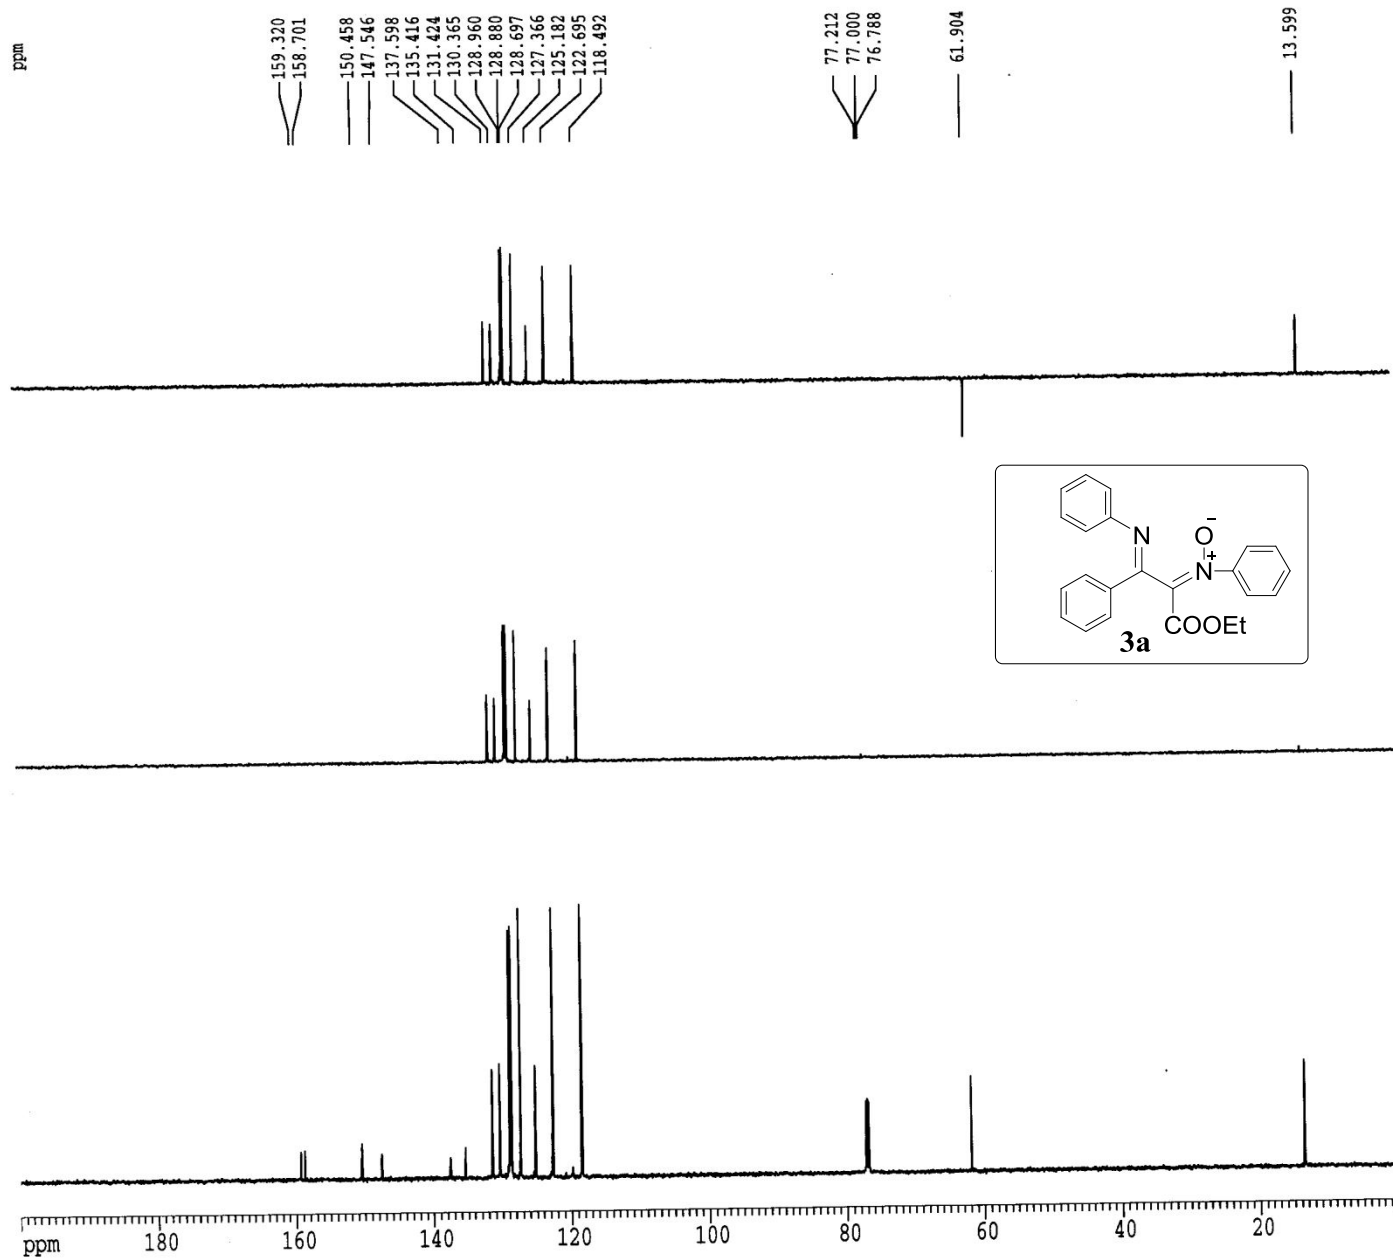

8.059  
8.058  
8.049  
8.046  
8.043  
7.989  
7.987  
7.978  
7.975  
7.973  
7.702  
7.699  
7.697  
7.687  
7.685  
7.677  
7.675  
7.620  
7.618  
7.616  
7.605  
7.604  
7.595  
7.593  
7.591  
7.542  
7.529  
7.518  
7.516  
7.468  
7.465  
7.455  
7.454  
7.444  
7.441

5.252

4.425  
4.413  
4.402  
4.390  
4.213  
4.201  
4.189  
4.177

1.383  
1.371  
1.359  
1.078  
1.066  
1.054

Current Data Parameters  
 NAME SNK-Triketo  
 EXFNO 1  
 PROCNO 1

F2 - Acquisition Parameters  
 Date\_ 20141001  
 Time\_ 13.58  
 INSTRUM spect  
 PROBHD 5 mm QNP 1H/1  
 PULPROG zg  
 TD 33556  
 SOLVENT CDCl3  
 NS 16  
 DS 0  
 SWH 8389.262 Hz  
 FIDRES 0.250008 Hz  
 AQ 1.9999876 sec  
 RG 128  
 DW 59.600 usec  
 DE 6.50 usec  
 TE 303.1 K  
 D1 2.00000000 sec  
 MCREST 0 sec  
 MCWRK 0.01500000 sec

----- CHANNEL f1 -----  
 NUC1 1H  
 P1 10.00 usec  
 PL1 0 dB  
 SF01 598.7029935 MHz

F2 - Processing parameters  
 SI 32768  
 SF 598.7000259 MHz  
 WDW no  
 SSB 0  
 LB 0 Hz  
 GB 0  
 PC 1.00

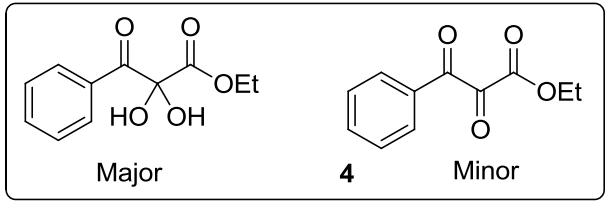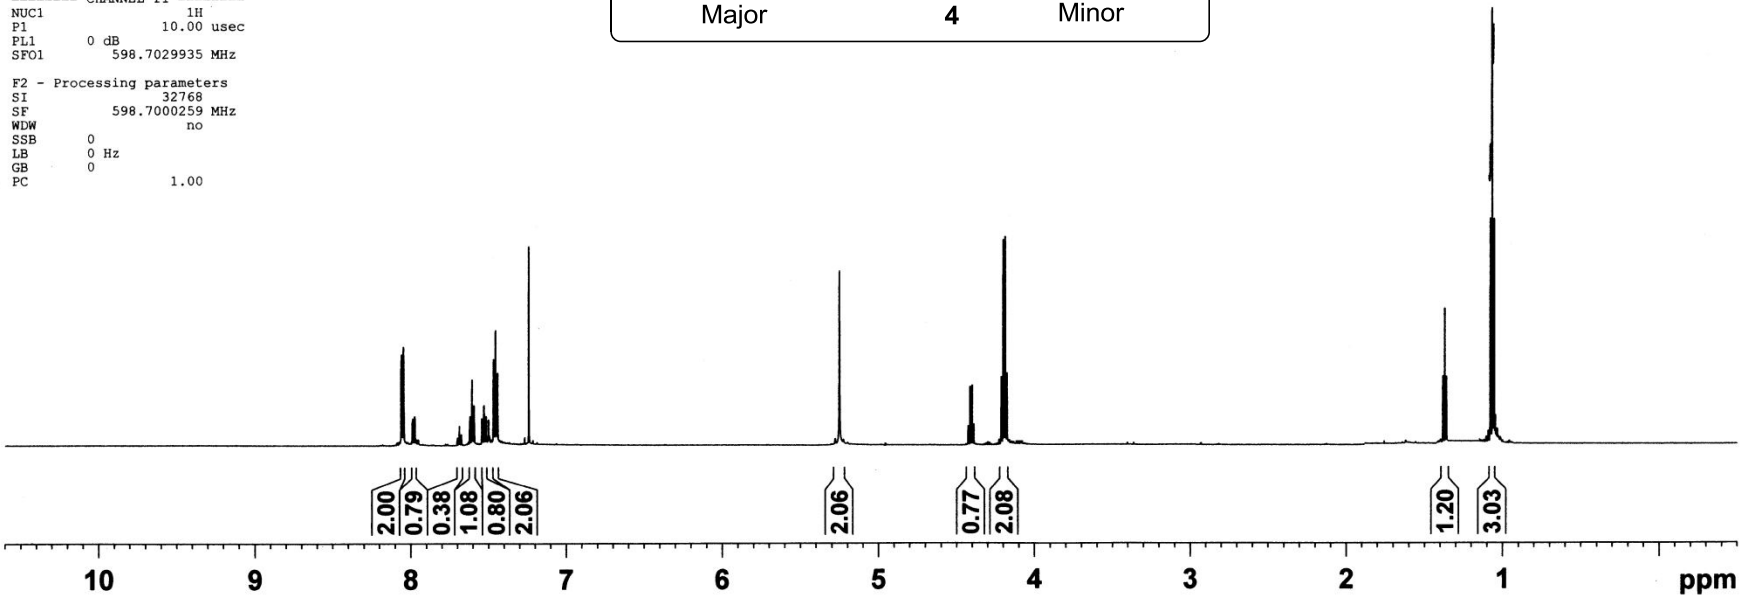

191.50  
190.18  
183.73  
169.88  
160.51

135.51  
134.66  
131.51  
131.35  
130.13  
130.02  
129.14  
128.77

91.52

77.18  
77.00  
76.82

63.31  
63.22

13.94  
13.64

Current Data Parameters  
NAME SNK-Triketo-C.fid  
EXPNO 1  
PROCNO 1

F2 - Processing parameters  
SI 131072  
SF 175.9536404 MHz  
WDW EM  
SSB 0  
LB 0.30 Hz  
GB 0  
PC 1.00

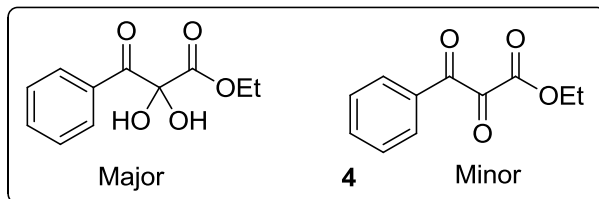

Std carbon

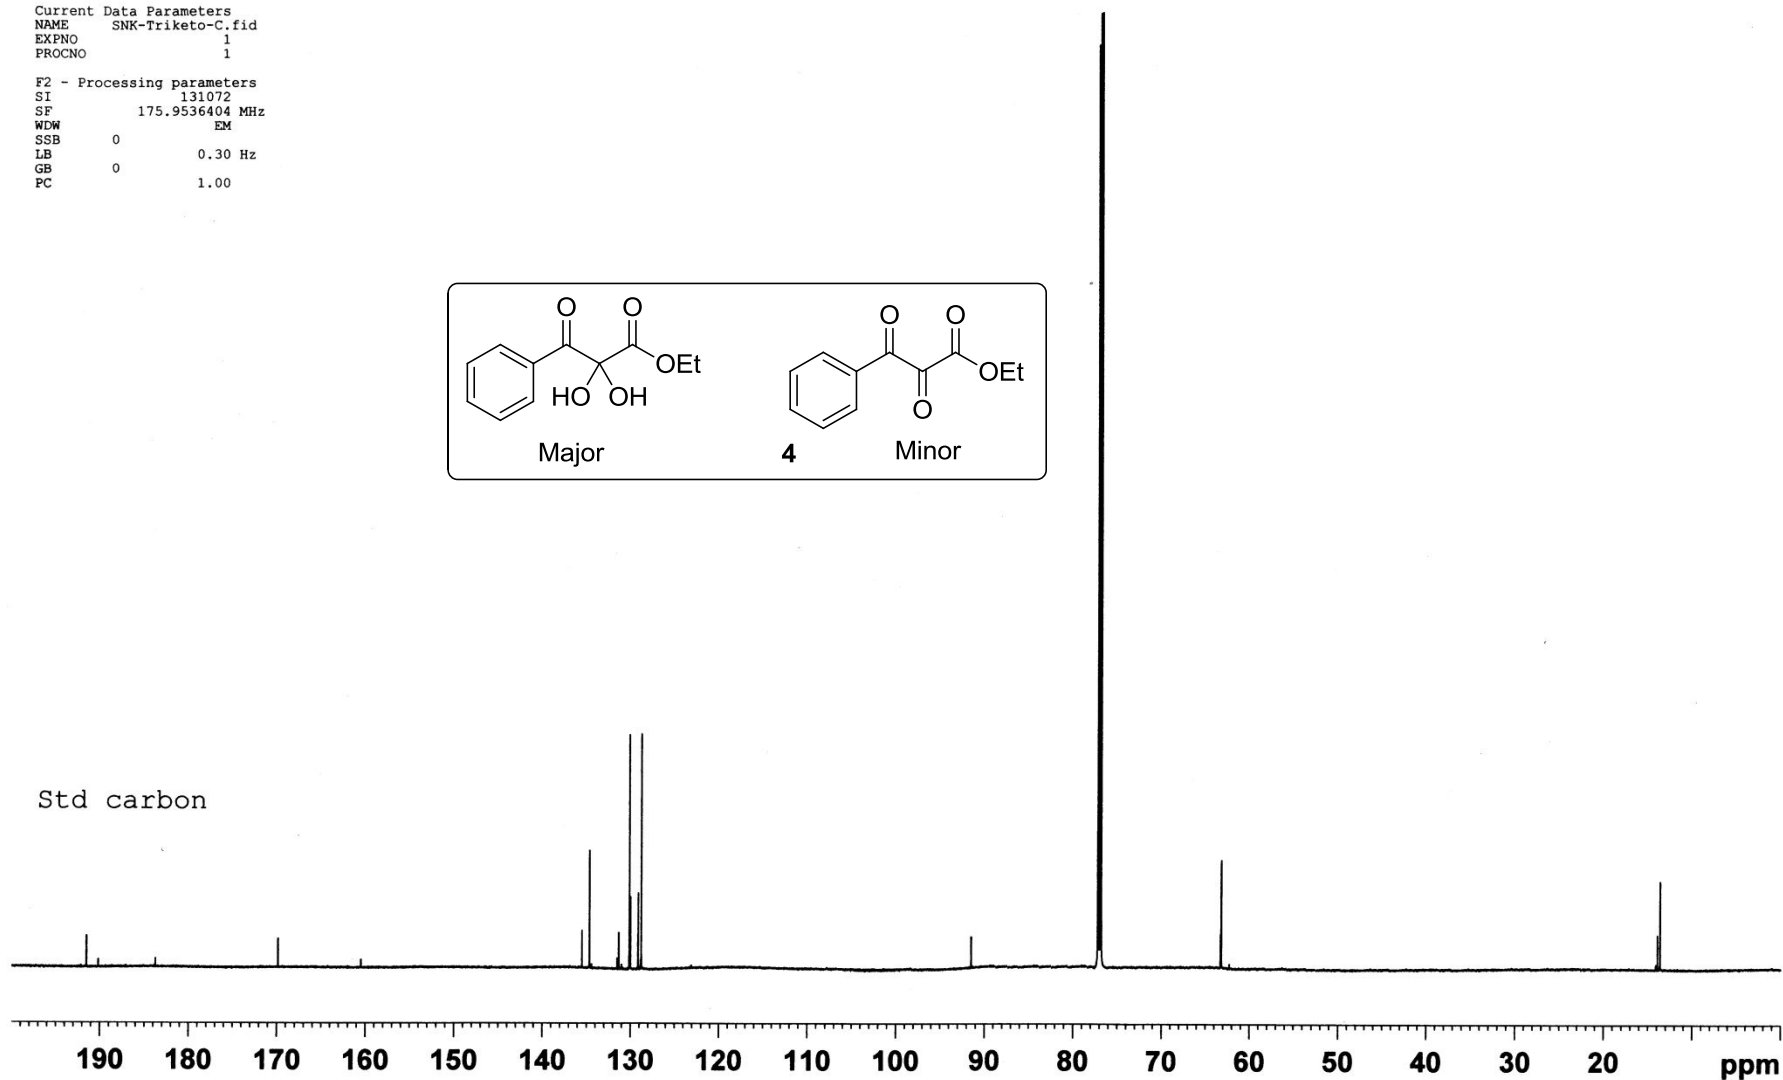

Current Data Parameters  
 NAME RKS-1-168  
 EXPNO 1  
 PROCNO 1

F2 - Acquisition Parameters  
 Date\_ 20130825  
 Time 21.12  
 INSTRUM spect  
 PROBHD 5 mm QNP 1H/1  
 PULPROG zg  
 TD 32768  
 SOLVENT CDCl3  
 NS 16  
 DS 0  
 SWH 9578.544 Hz  
 FIDRES 0.292314 Hz  
 AQ 1.7105396 sec  
 RG 32  
 DW 52.200 usec  
 DE 6.50 usec  
 TE 303.3 K  
 DI 1.00000000 sec  
 MCREST 0.00000000 sec  
 MCWRK 0.01500000 sec

===== CHANNEL f1 =====  
 NUC1 1H  
 P1 10.00 usec  
 PL1 0.00 dB  
 SFO1 598.8041916 MHz

F2 - Processing parameters  
 SI 32768  
 SF 598.8000288 MHz  
 WDW no  
 SSB 0  
 LB 0.00 Hz  
 GB 0  
 PC 1.00

1D NMR plot parameters  
 CX 20.00 cm  
 CY 6.00 cm  
 FLP 10.000 ppm  
 F1 5988.00 Hz  
 F2P -0.500 ppm  
 F2 -299.40 Hz  
 PPMCM 0.52500 ppm/cm  
 HZCM 314.37003 Hz/cm

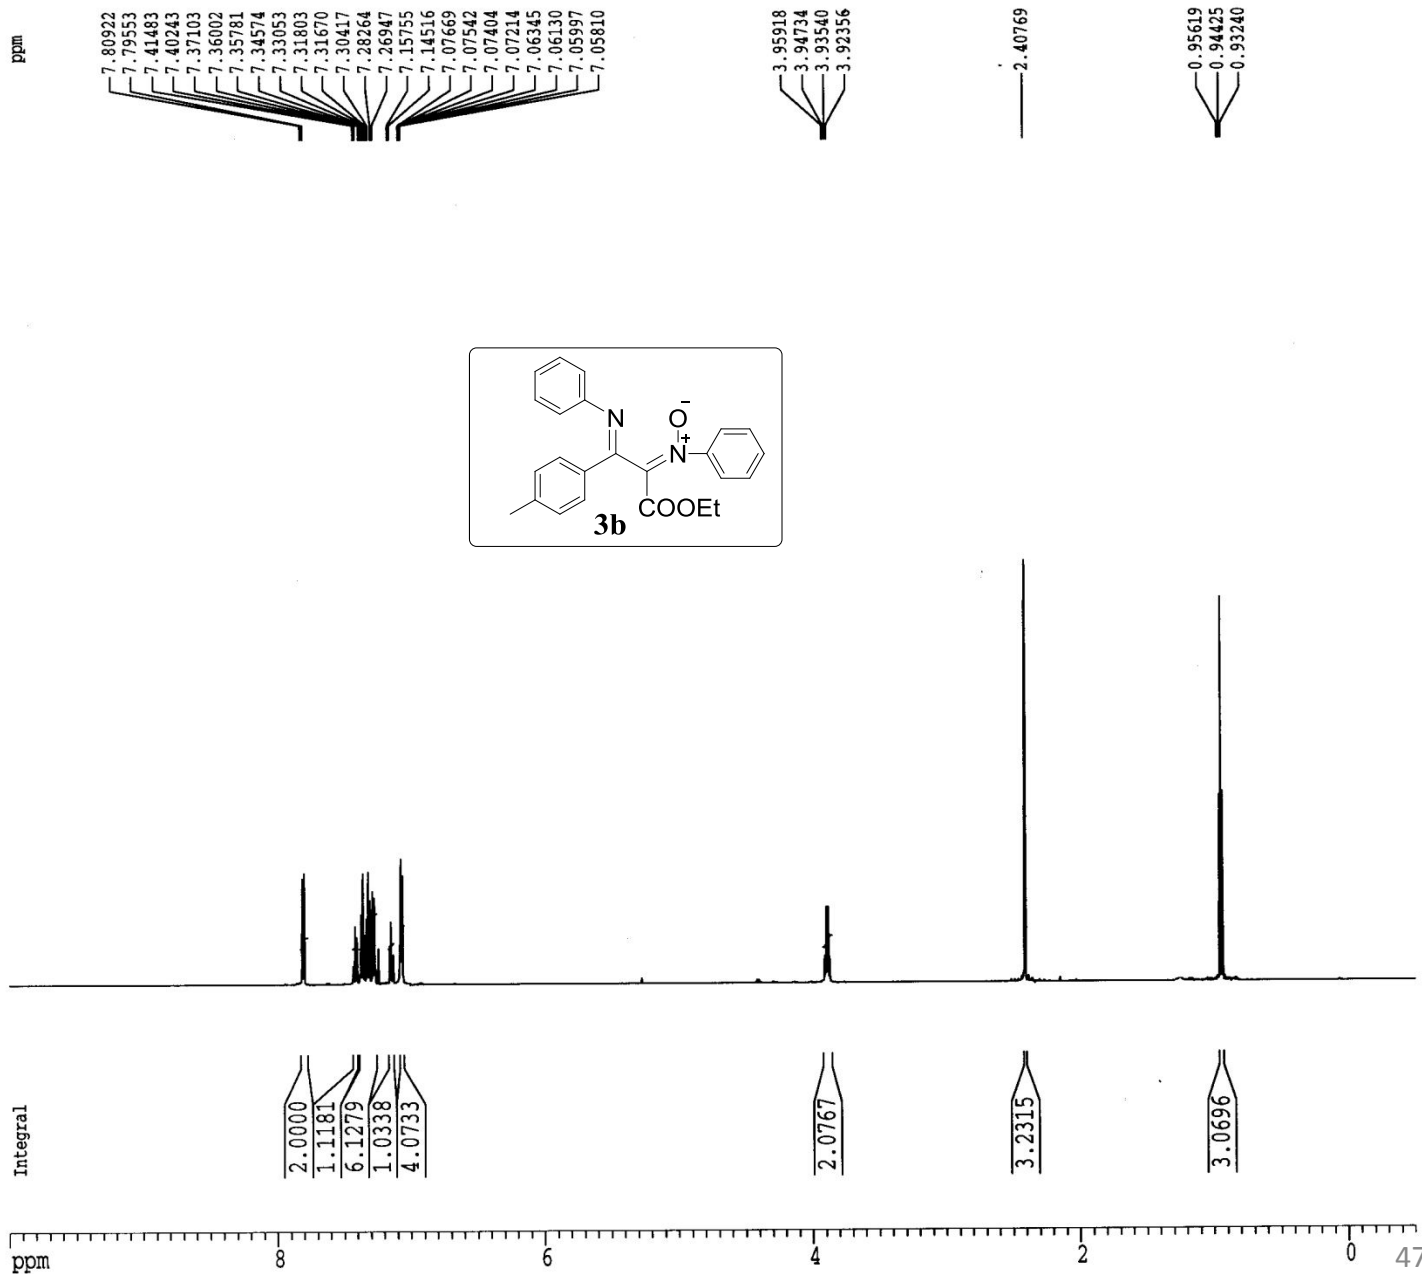

Current Data Parameters  
 NAME RKS-1-168  
 EXPNO 2  
 PROCNO 1

F2 - Acquisition Parameters  
 Date\_ 20130825  
 Time 21.19  
 INSTRUM spect  
 PROBHD 5 mm QNP 1H/1  
 PULPROG zgpg  
 TD 32768  
 SOLVENT DMSO  
 NS 100  
 DS 0  
 SWH 45045.047 Hz  
 FIDRES 1.374666 Hz  
 AQ 0.3637748 sec  
 RG 2048  
 DW 11.100 usec  
 DE 6.50 usec  
 TE 304.3 K  
 D1 3.50000000 sec  
 d11 0.03000000 sec  
 DELTA 3.40000010 sec  
 MCREST 0.00000000 sec  
 MCWRK 0.01500000 sec

===== CHANNEL f1 =====  
 NUC1 13C  
 P1 4.80 usec  
 PL1 0.00 dB  
 SFO1 150.5849425 MHz

===== CHANNEL f2 =====  
 CPDPRG2 waltz16  
 NUC2 1H  
 PCPD2 92.00 usec  
 PL2 120.00 dB  
 PL12 9.00 dB  
 PL13 14.00 dB  
 SFO2 598.8029940 MHz

F2 - Processing parameters  
 SI 65536  
 SF 150.5683862 MHz  
 WDW EM  
 SSB 0  
 LB 3.00 Hz  
 GB 0  
 PC 0.50

1D NMR plot parameters  
 CX 20.00 cm  
 CY 4.00 cm  
 F1P 200.000 ppm  
 F1 30113.68 Hz  
 F2P 0.000 ppm  
 F2 0.00 Hz  
 PPMCM 10.00000 ppm/cm  
 HZCM 1505.68384 Hz/cm

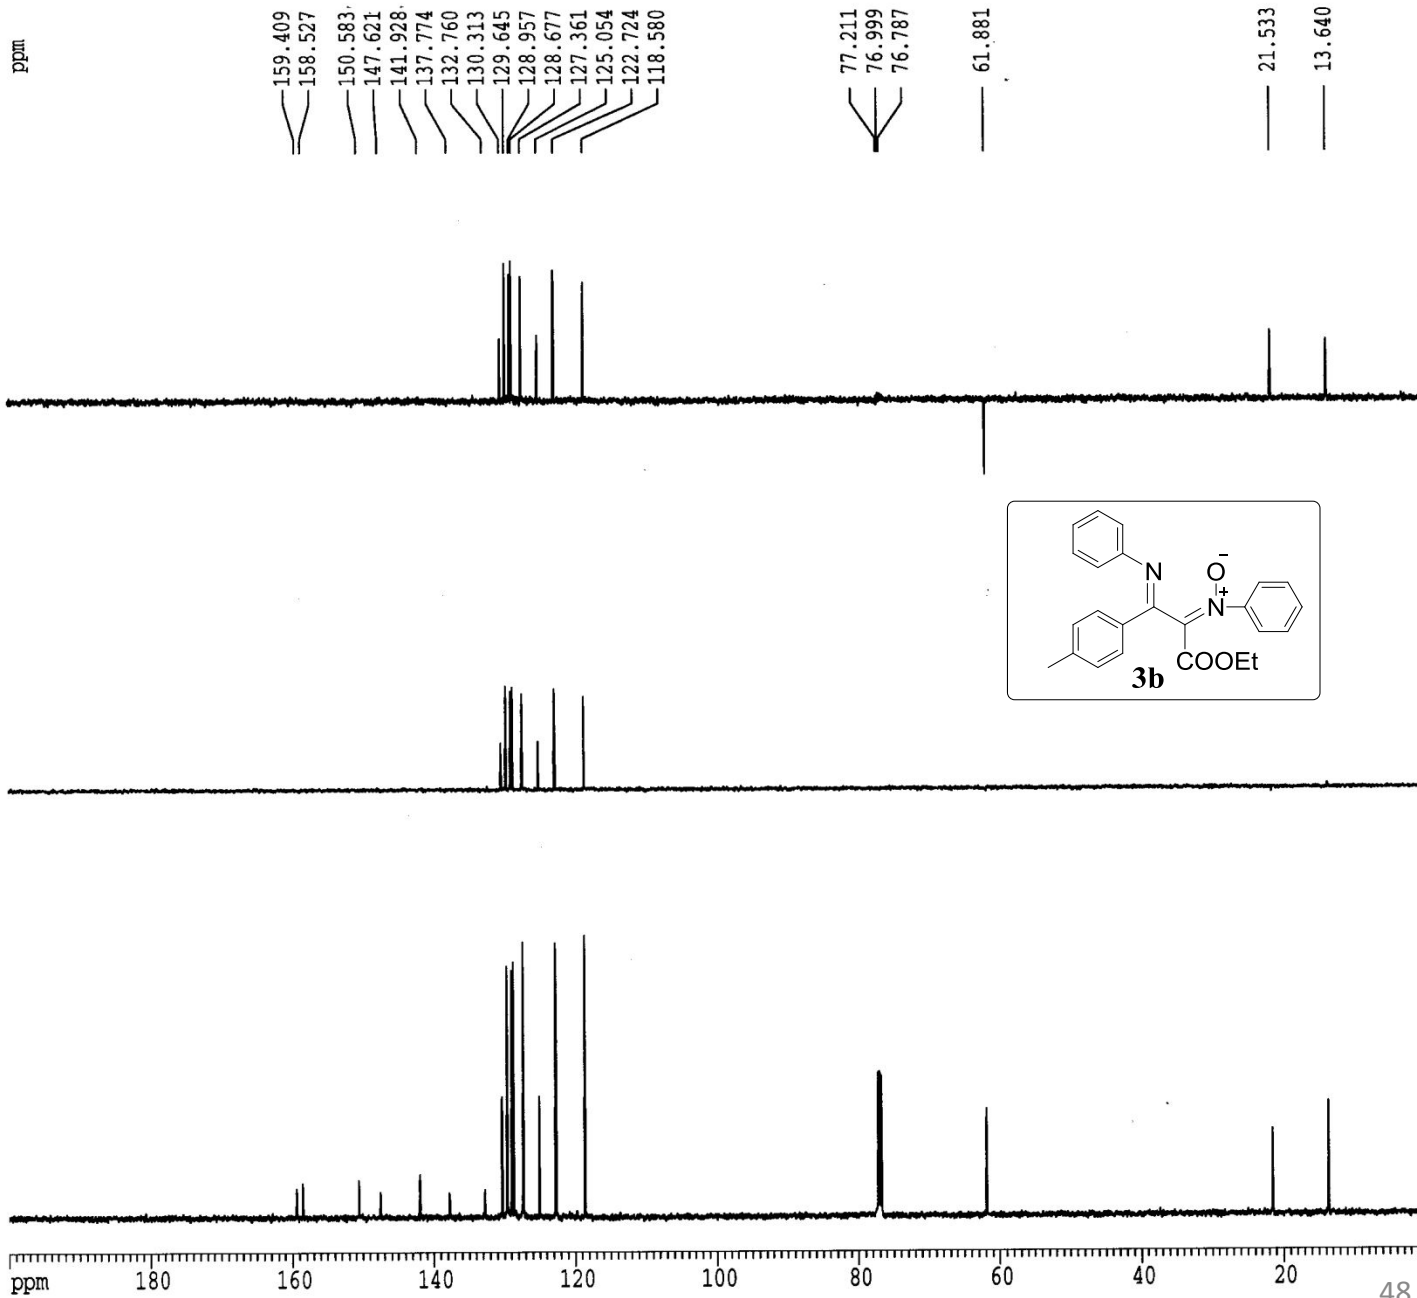



7.8687  
7.8638  
7.8517  
7.8465  
7.4347  
7.4319  
7.4229  
7.4161  
7.4104  
7.4013  
7.3981  
7.3949  
7.3744  
7.3591  
7.3550  
7.3417  
7.3375  
7.3312  
7.3264  
7.3121  
7.3109  
7.2919  
7.2407  
7.1552  
7.1525  
7.1366  
7.1181  
7.0690  
7.0653  
7.0482  
7.0451  
6.9966  
6.9894  
6.9843  
6.9722  
6.9672  
6.9599  
3.9216  
3.9042  
3.8864  
3.8569

0.9657  
0.9479  
0.9300

Current Data Parameters  
NAME 20140804  
EXPNO 1  
PROCNO 1

F2 - Acquisition Parameters  
Date\_ 20140804  
Time 15.59  
INSTRUM spect  
PROBHD 5 mm DUL 13C-1  
PULPROG zg30  
TD 32768  
SOLVENT CDCl3  
NS 36  
DS 0  
SWH 6410.256 Hz  
FIDRES 0.195625 Hz  
AQ 2.5559540 sec  
RG 287  
DW 78.000 usec  
DE 6.00 usec  
TE 300.0 K  
D1 2.00000000 sec  
TDO 1

----- CHANNEL f1 -----  
NUC1 1H  
P1 10.00 usec  
PL1 -2.40 dB  
SFO1 400.1528010 MHz

F2 - Processing parameters  
SI 16384  
SF 400.1500170 MHz  
WDW EM  
SSB 0  
LB 0.00 Hz  
GB 0  
PC 1.00

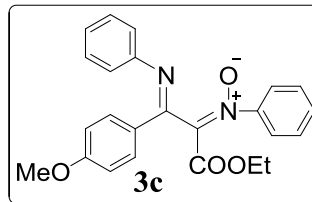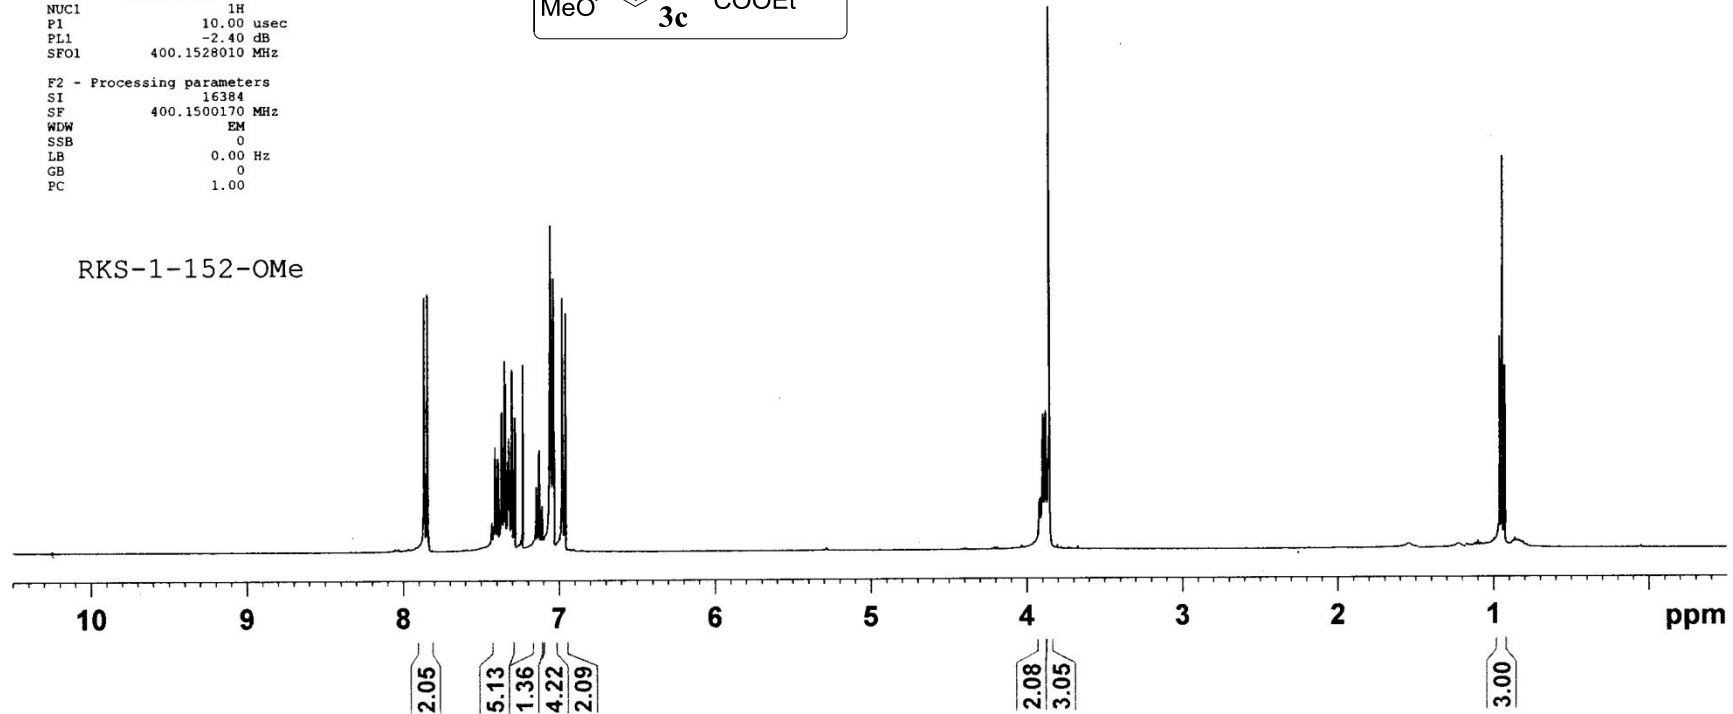

Current Data Parameters

NAME 20140807  
 EXPNO 2  
 PROCNO 1

F2 - Acquisition Parameters

Date\_ 20140807  
 Time 18.09  
 INSTRUM spect  
 PROBHD 5 mm DUL 13C-1  
 PULPROG zgpg30  
 TD 65536  
 SOLVENT CDCl3  
 NS 1000  
 DS 0  
 SWH 22727.273 Hz  
 FIDRES 0.346791 Hz  
 AQ 1.4418420 sec  
 RG 57  
 DW 22.000 usec  
 DE 8.00 usec  
 TE 300.0 K  
 D1 2.00000000 sec  
 d11 0.03000000 sec  
 DELTA 1.89999998 sec  
 TDO 1

===== CHANNEL f1 =====

NUC1 13C  
 P1 9.70 usec  
 PL1 -0.50 dB  
 SFO1 100.6288660 MHz

===== CHANNEL f2 =====

CPDPRG2 waltz16  
 NUC2 1H  
 PCPD2 90.00 usec  
 PL2 -2.40 dB  
 PL12 15.10 dB  
 PL13 18.10 dB  
 SFO2 400.1514010 MHz

F2 - Processing parameters

SI 32768  
 SF 100.6178000 MHz  
 WDW EM  
 SSB 0  
 LB 3.00 Hz  
 GB 0  
 PC 1.00

162.35  
 159.47  
 157.84  
 150.64  
 147.64  
 137.80  
 130.33  
 129.14  
 128.98  
 128.69  
 128.10  
 124.96  
 122.72  
 118.66  
 114.36

77.32  
 77.00  
 76.68

61.91

55.44

13.68

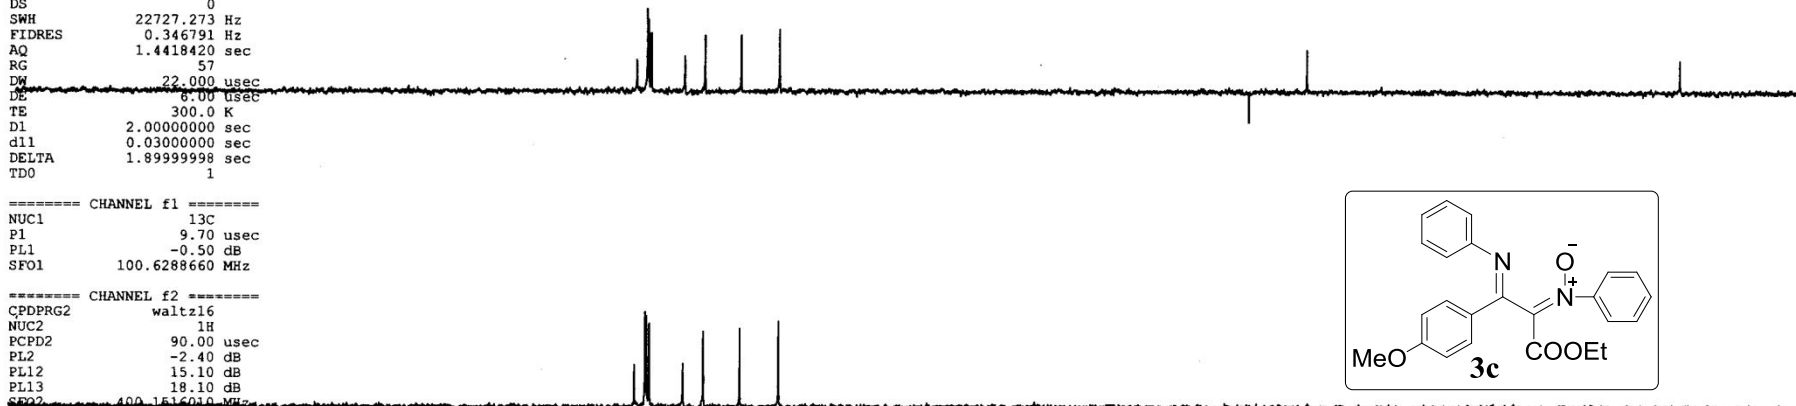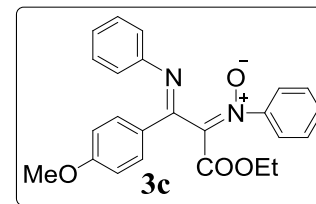

RKS-1-152 OMe

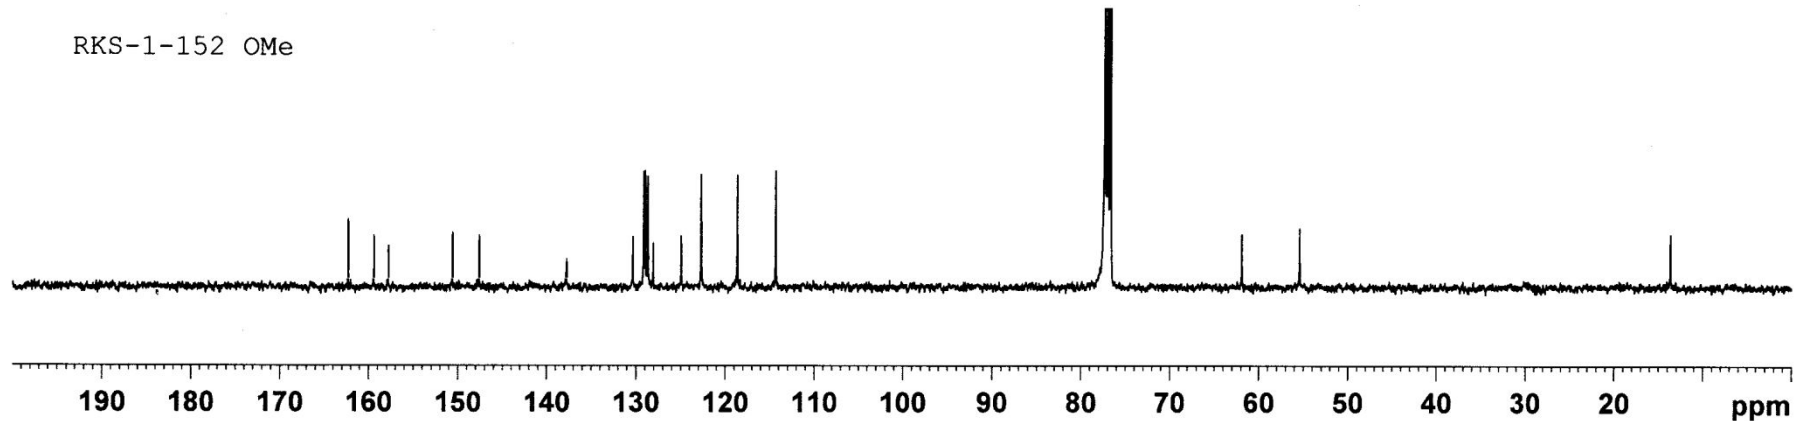

Current Data Parameters  
 NAME RKS-1-162  
 EXPNO 1  
 PROCNO 1

F2 - Acquisition Parameters  
 Date\_ 20130806  
 Time 21.14  
 INSTRUM spect  
 PROBHD 5 mm QNP 1H/1  
 PULPROG zg  
 TD 32768  
 SOLVENT CDCl3  
 NS 16  
 DS 0  
 SWH 8382.229 Hz  
 FIDRES 0.255805 Hz  
 AQ 1.9546613 sec  
 RG 128  
 DW 59.650 usec  
 DE 6.50 usec  
 TE 296.6 K  
 D1 1.00000000 sec  
 MCREST 0.00000000 sec  
 MCWRK 0.01500000 sec

===== CHANNEL f1 =====  
 NUC1 1H  
 P1 10.00 usec  
 PL1 0.00 dB  
 SFO1 598.8026946 MHz

F2 - Processing parameters  
 SI 32768  
 SF 598.8000292 MHz  
 WDW no  
 SSB 0  
 LB 0.00 Hz  
 GB 0  
 PC 1.00

1D NMR plot parameters  
 CX 20.00 cm  
 CY 8.00 cm  
 F1P 10.000 ppm  
 F1 5988.00 Hz  
 F2P -0.500 ppm  
 F2 -299.40 Hz  
 PPMCM 0.52500 ppm/cm  
 HZCM 314.37003 Hz/cm

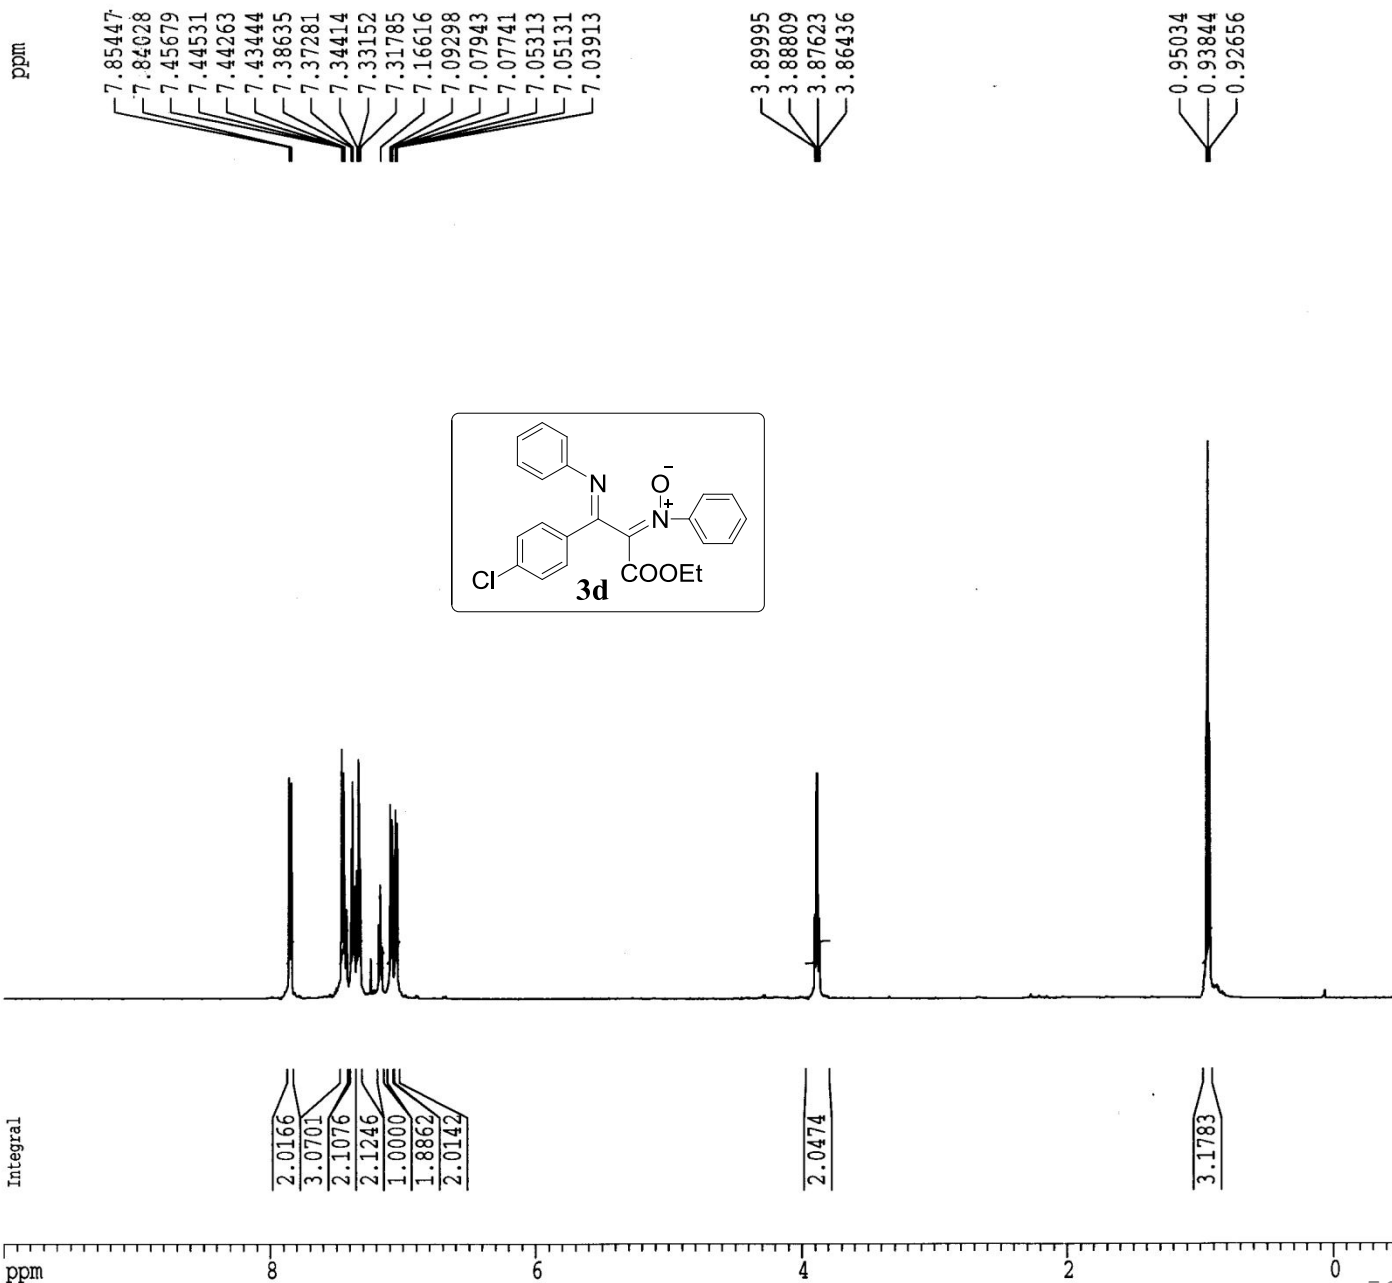

Current Data Parameters  
NAME RKS-1-162  
EXPNO 2  
PROCNO 1

F2 - Acquisition Parameters  
Date\_ 20130806  
Time 19.50  
INSTRUM spect  
PROBHD 5 mm QNP 1H/1  
PULPROG zgpg  
TD 32768  
SOLVENT CDCl3  
NS 173  
DS 0  
SWH 45045.047 Hz  
FIDRES 1.374666 Hz  
AQ 0.3637748 sec  
RG 2048  
DW 11.100 usec  
DE 6.50 usec  
TE 290.0 K  
D1 3.5000000 sec  
d11 0.0300000 sec  
DELTA 3.4000010 sec  
MCREST 0.0000000 sec  
MCWRK 0.0150000 sec

=====  
CHANNEL f1  
NUC1 13C  
P1 4.80 usec  
PL1 0.00 dB  
SFO1 150.5849425 MHz

=====  
CHANNEL f2  
CPDPRG2 waltz16  
NUC2 1H  
PCPD2 92.00 usec  
PL2 120.00 dB  
PL12 9.00 dB  
PL13 14.00 dB  
SFO2 598.8029940 MHz

F2 - Processing parameters  
SI 65536  
SF 150.5683945 MHz  
WDW EM  
SSB 0  
LB 3.00 Hz  
GB 0  
PC 0.50

1D NMR plot parameters  
CX 20.00 cm  
CY 4.00 cm  
F1P 200.000 ppm  
F1 30113.68 Hz  
F2P 0.000 ppm  
F2 0.00 Hz  
PPMCM 10.00000 ppm/cm  
HZCM 1505.68384 Hz/cm

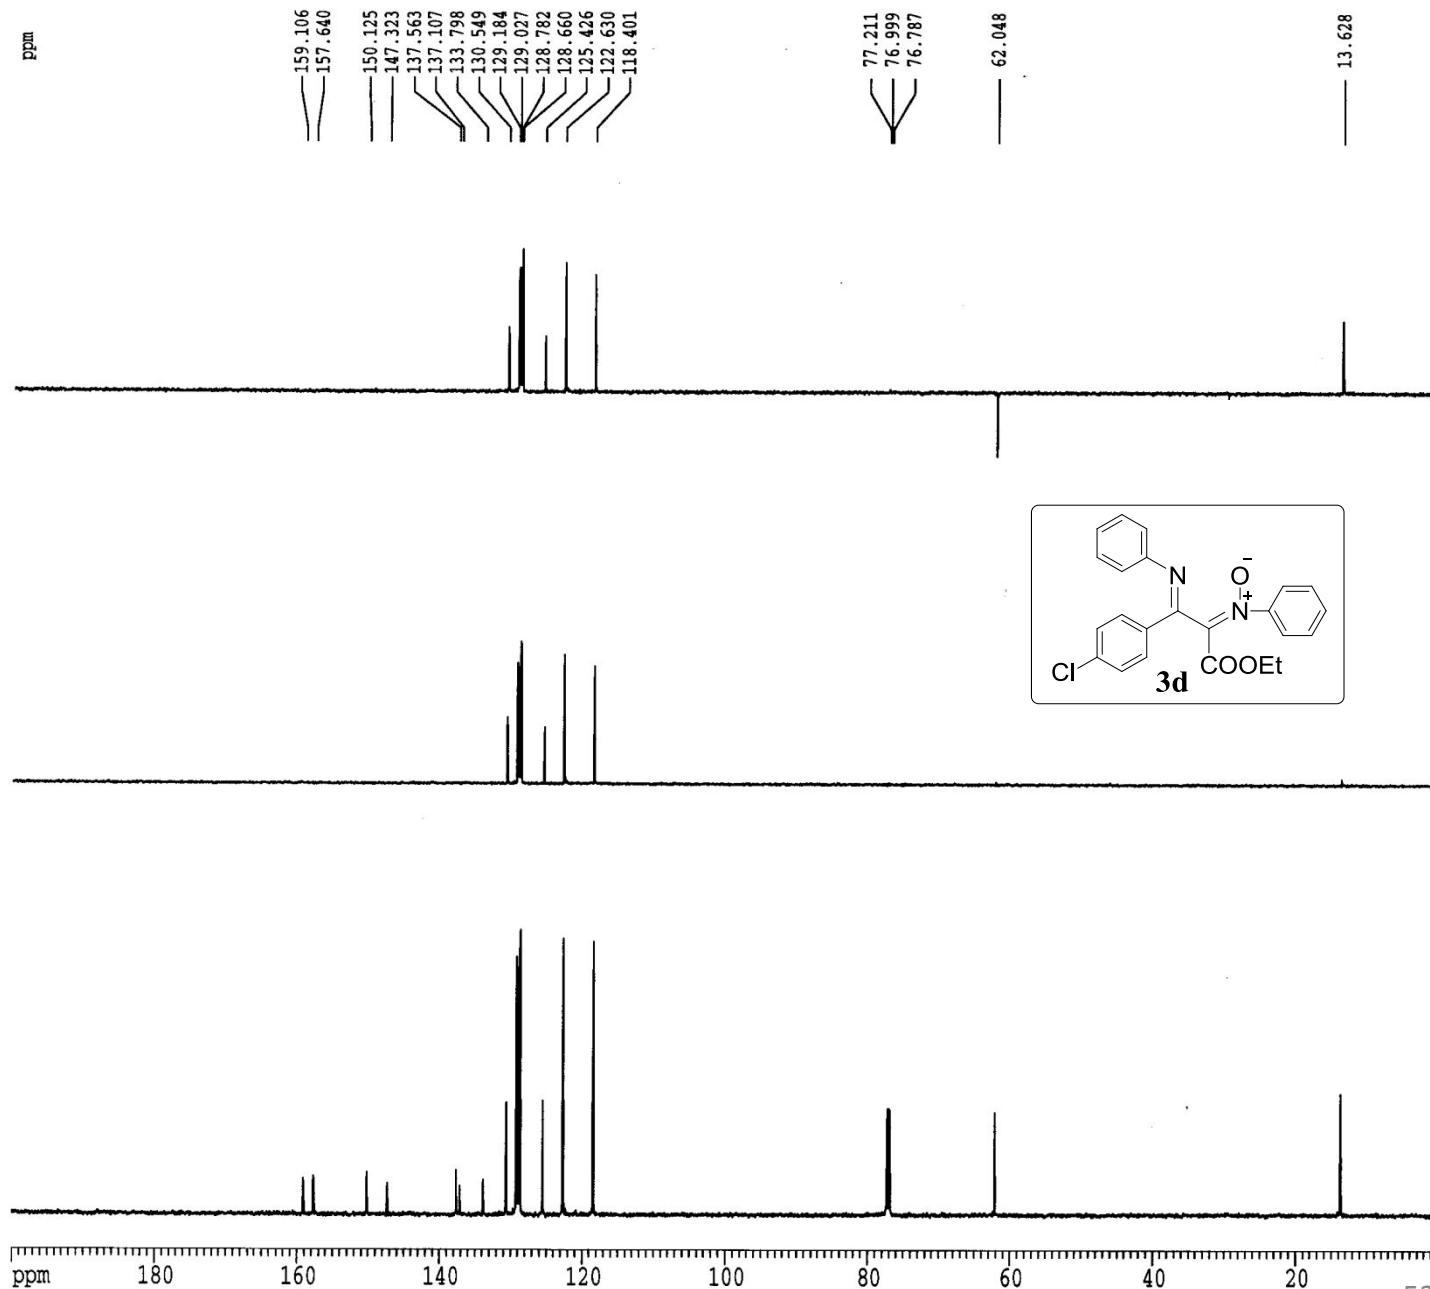

7.566  
7.553  
7.408  
7.407  
7.394  
7.391  
7.383  
7.383  
7.382  
7.380  
7.346  
7.343  
7.338  
7.335  
7.333  
7.326  
7.321  
7.320  
7.319  
7.315  
7.313  
7.300  
7.299  
7.288  
7.258  
7.246  
7.243  
7.241  
7.240  
7.234  
7.233  
7.233  
7.159  
7.147  
7.146  
7.135  
7.133  
7.089  
7.087  
7.075  
7.073  
7.070  
7.058  
7.056

3.859  
3.847  
3.835  
3.823

2.671

1.547

0.934  
0.922  
0.910

Current Data Parameters  
NAME RKS-2-156  
EXPNO 1  
PROCNO 1

F2 - Acquisition Parameters  
Date\_ 20140925  
Time 11.46  
INSTRUM spect  
PROBHD 5 mm QNP 1H/1  
PULPROG zg  
TD 33556  
SOLVENT CDCl3  
NS 16  
DS 0  
SWH 8389.262 Hz  
FIDRES 0.250008 Hz  
AQ 1.9999876 sec  
RG 512  
DW 59.600 usec  
DE 6.50 usec  
TE 301.7 K  
D1 2.00000000 sec  
MCREST 0 sec  
MCWRK 0.01500000 sec

===== CHANNEL f1 =====  
NUC1 1H  
P1 10.00 usec  
PL1 0 dB  
SFO1 598.7029935 MHz

F2 - Processing parameters  
SI 32768  
SF 598.7000255 MHz  
WDW no  
SSB 0  
LB 0 Hz  
GB 0  
PC 1.00

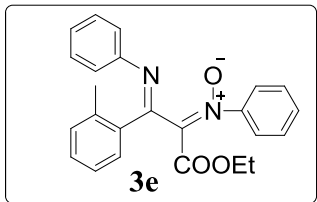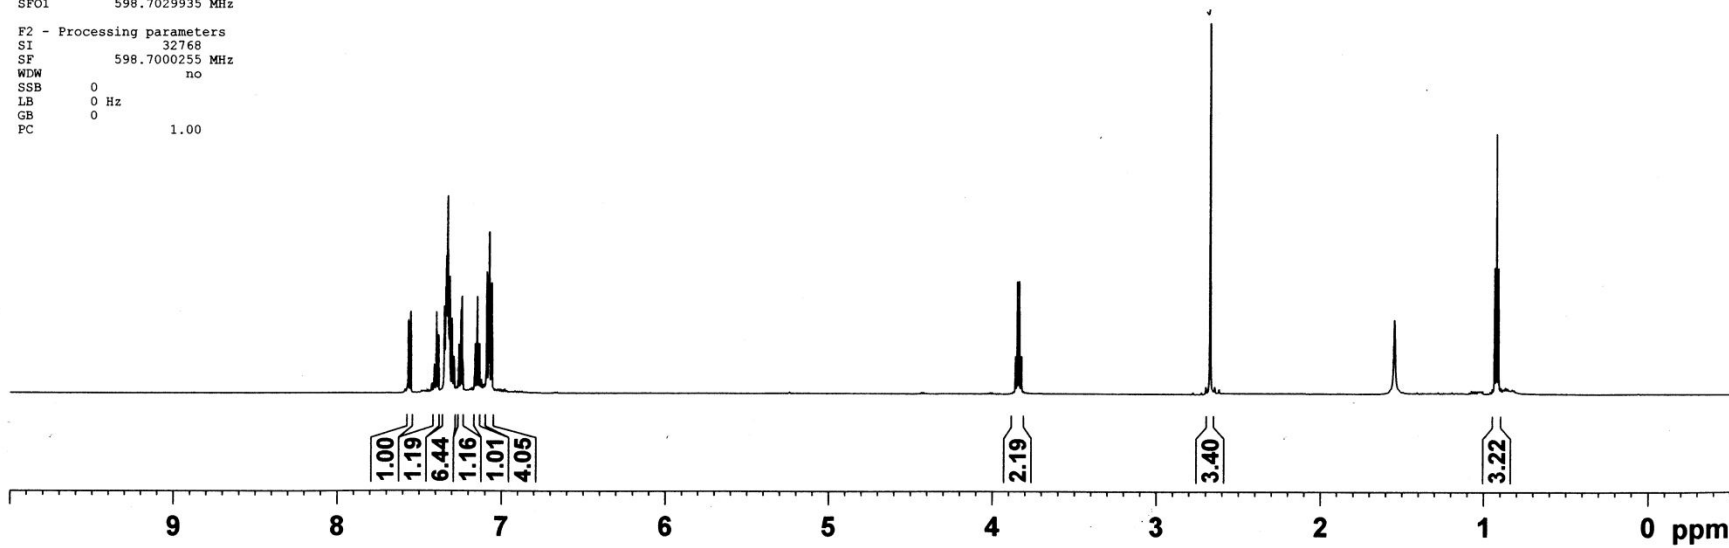

159.87  
 159.70  
 150.40  
 147.54  
 138.97  
 138.75  
 135.75  
 131.61  
 130.41  
 130.03  
 128.92  
 128.76  
 128.03  
 125.72  
 125.35  
 122.72  
 118.75

77.21  
 77.00  
 76.79

61.94

20.19  
 13.55

Current Data Parameters  
 NAME RKS-2-156  
 EXPNO 2  
 PROCNO 1

F2 - Acquisition Parameters  
 Date 20140925  
 Time 11.53  
 INSTRUM spect  
 PROBHD 5 mm QNP 1H/1  
 PULPROG zgpg  
 TD 32768  
 SOLVENT CDCl3  
 NS 425  
 DS 0  
 SWH 45045.047 Hz  
 FIDRES 1.374666 Hz  
 AQ 0.3637748 sec  
 RG 2048  
 DW 11.100 usec  
 DE 6.50 usec  
 TE 304.1 K  
 D1 3.5000000 sec  
 d11 0.0300000 sec  
 DELTA 3.4000010 sec  
 MCREST 0 sec  
 MCWRK 0.0150000 sec

===== CHANNEL f1 =====  
 NUC1 13C  
 P1 4.80 usec  
 PL1 0 dB  
 SFO1 150.5597948 MHz

===== CHANNEL f2 =====  
 CPDPRG2 waltz16  
 NUC2 1H  
 PCPD2 92.00 usec  
 PL2 120.00 dB  
 PL12 9.00 dB  
 PL13 14.00 dB  
 SFO2 598.7029935 MHz

F2 - Processing parameters  
 SI 65536  
 SF 150.5432349 MHz  
 WDW EM  
 SSB 0  
 LB 3.00 Hz  
 GB 0  
 PC 1.00

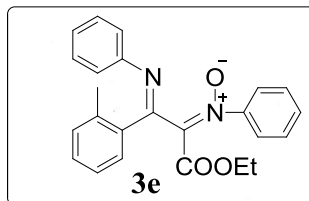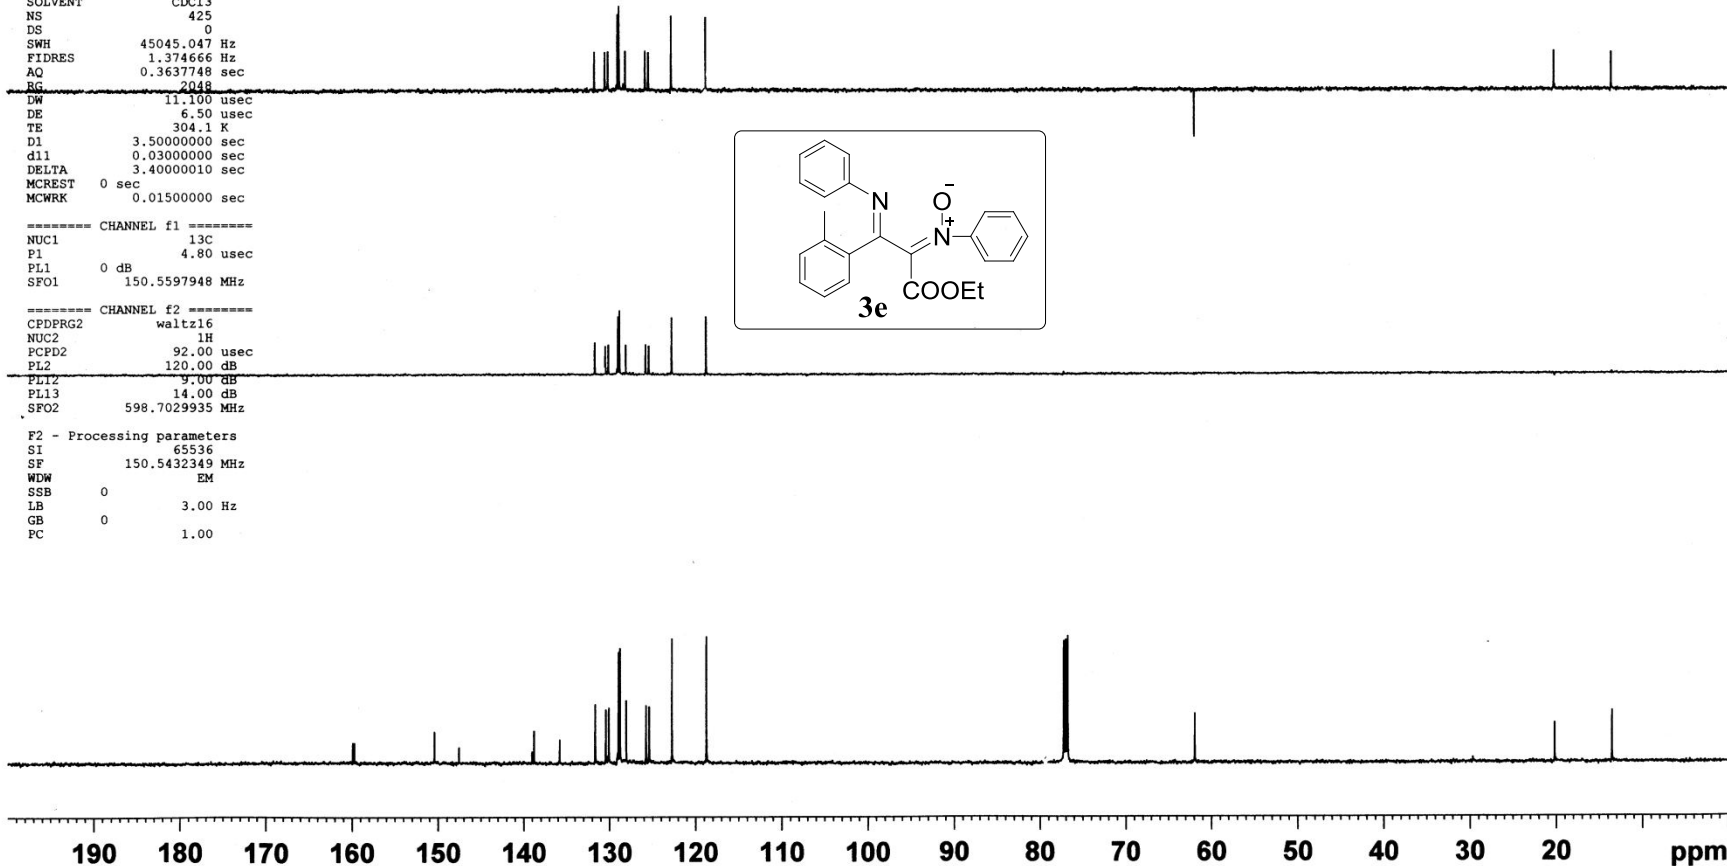

7.5311  
7.5284  
7.5185  
7.5160  
7.4515  
7.4396  
7.4328  
7.4270  
7.4172  
7.4147  
7.4121  
7.4056  
7.4029  
7.3963  
7.3904  
7.3750  
7.3707  
7.3577  
7.3533  
7.3500  
7.3333  
7.3285  
7.3145  
7.2983  
7.2941  
7.2407  
7.1670  
7.1642  
7.1484  
7.1298  
7.1270  
7.1093  
7.0971  
7.0950  
7.0877  
7.0770  
7.0738  
3.9327  
3.9260  
3.9150  
3.9083

Current Data Parameters  
 NAME 20140801  
 EXPNO 1  
 PROCNO 1

F2 - Acquisition Parameters  
 Date\_ 20140801  
 Time\_ 19.23  
 INSTRUM spect  
 PROBHD 5 mm DUL 13C-1  
 PULPROG zg30  
 TD 32768  
 SOLVENT CDCl3  
 NS 32  
 DS 0  
 SWH 6410.256 Hz  
 FIDRES 0.195625 Hz  
 AQ 2.5559540 sec  
 RG 512  
 DW 78.000 usec  
 DE 6.00 usec  
 TE 300.0 K  
 D1 2.0000000 sec  
 TDO 1

----- CHANNEL f1 -----  
 NUC1 1H  
 P1 10.00 usec  
 PL1 -2.40 dB  
 SFO1 400.1528010 MHz

F2 - Processing parameters  
 SI 16384  
 SF 400.1500168 MHz  
 WDW EM  
 SSB 0  
 LB 0.00 Hz  
 GB 0  
 PC 1.00

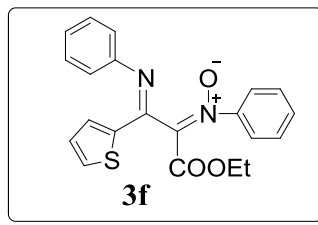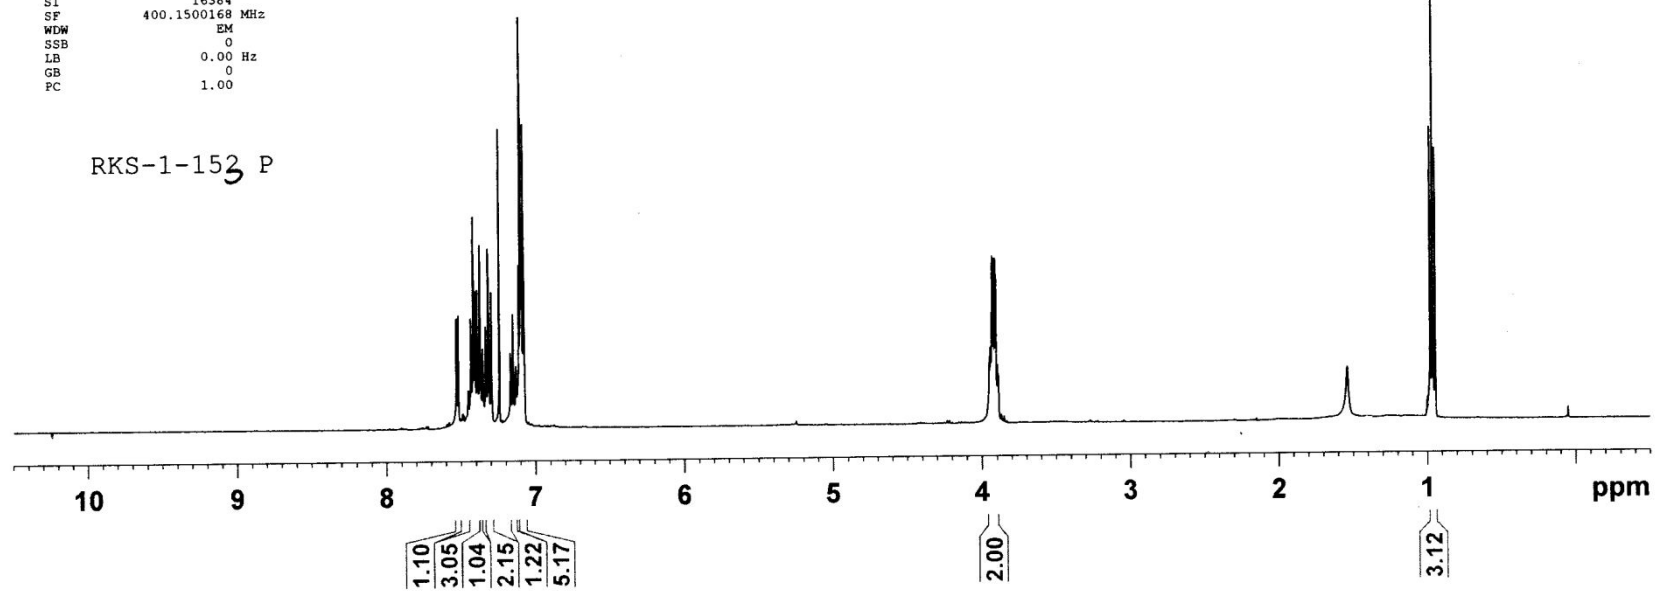

1.5388  
0.9800  
0.9622  
0.9445

Current Data Parameters  
NAME RKS-1-152-1  
EXPNO 2  
PROCNO 1

F2 - Acquisition Parameters

Date\_ 20140302  
Time 19.48  
INSTRUM spect  
PROBHD 5 mm QNP 1H/1  
PULPROG zgpg  
TD 32768  
SOLVENT CDCl3  
NS 209  
DS 0  
SWH 45045.047 Hz  
FIDRES 1.374666 Hz  
AQ 0.3637748 sec  
RG 2048  
DW 11.100 usec  
DE 6.50 usec  
TE 293.7 K  
D1 3.50000000 sec  
d11 0.03000000 sec  
DELTA 3.40000010 sec  
MCREST 0.00000000 sec  
MCWRK 0.01500000 sec

==== CHANNEL f1 =====  
NUC1 13C  
P1 4.80 usec  
PL1 0.00 dB  
SFO1 150.5597948 MHz

==== CHANNEL f2 =====  
CPDPRG2 waltz16  
NUC2 1H  
PCPD2 92.00 usec  
PL2 120.00 dB  
PL12 9.00 dB  
PL13 14.00 dB  
SFO2 598.7029935 MHz

F2 - Processing parameters

SI 65536  
SF 150.5432431 MHz  
WDW EM  
SSB 0  
LB 3.00 Hz  
GB 0  
PC 0.50

1D NMR plot parameters

CX 20.00 cm  
CY 4.00 cm  
FIP 200.000 ppm  
F1 30108.65 Hz  
F2P 0.000 ppm  
F2 0.00 Hz  
PPMCM 10.00000 ppm/cm  
HZCM 1505.43237 Hz/cm

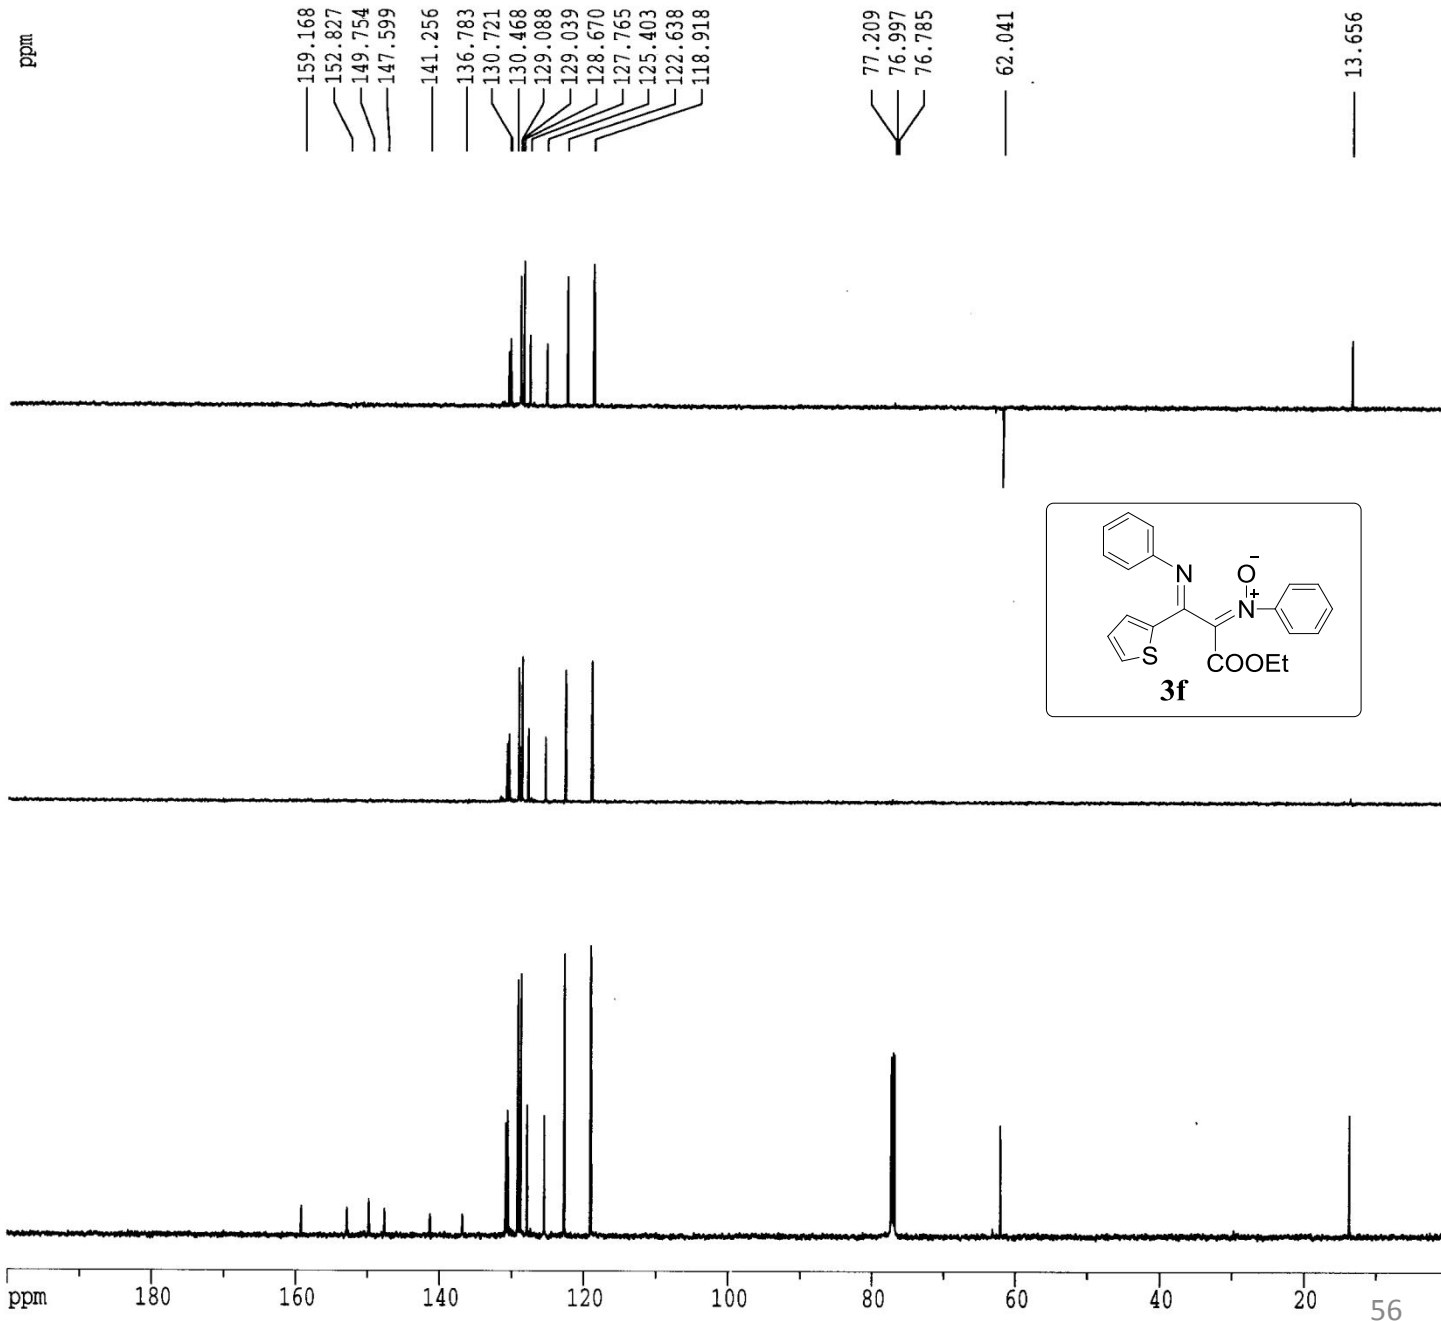



Current Data Parameters  
 NAME RKS-1-192  
 EXPNO 1  
 PROCNO 1

F2 - Acquisition Parameters  
 Date\_ 20130912  
 Time 16.34  
 INSTRUM spect  
 PROBHD 5 mm QNP 1H/1  
 PULPROG zg  
 TD 47890  
 SOLVENT CDCl3  
 NS 16  
 DS 0  
 SWH 7183.908 Hz  
 FIDRES 0.150009 Hz  
 AQ 3.3331940 sec  
 RG 128  
 DW 69.600 usec  
 DE 6.50 usec  
 TE 302.4 K  
 D1 2.00000000 sec  
 MCREST 0.00000000 sec  
 MCWRK 0.01500000 sec

===== CHANNEL f1 =====  
 NUC1 1H  
 P1 10.00 usec  
 PL1 0.00 dB  
 SFO1 598.8029940 MHz

F2 - Processing parameters  
 SI 32768  
 SF 598.8000287 MHz  
 WDW no  
 SSB 0  
 LB 0.00 Hz  
 GB 0  
 PC 1.00

1D NMR plot parameters  
 CX 20.00 cm  
 CY 6.00 cm  
 F1P 10.000 ppm  
 F1 5988.00 Hz  
 F2P -0.500 ppm  
 F2 -299.40 Hz  
 PPMCM 0.52500 ppm/cm  
 HZCM 314.37003 Hz/cm

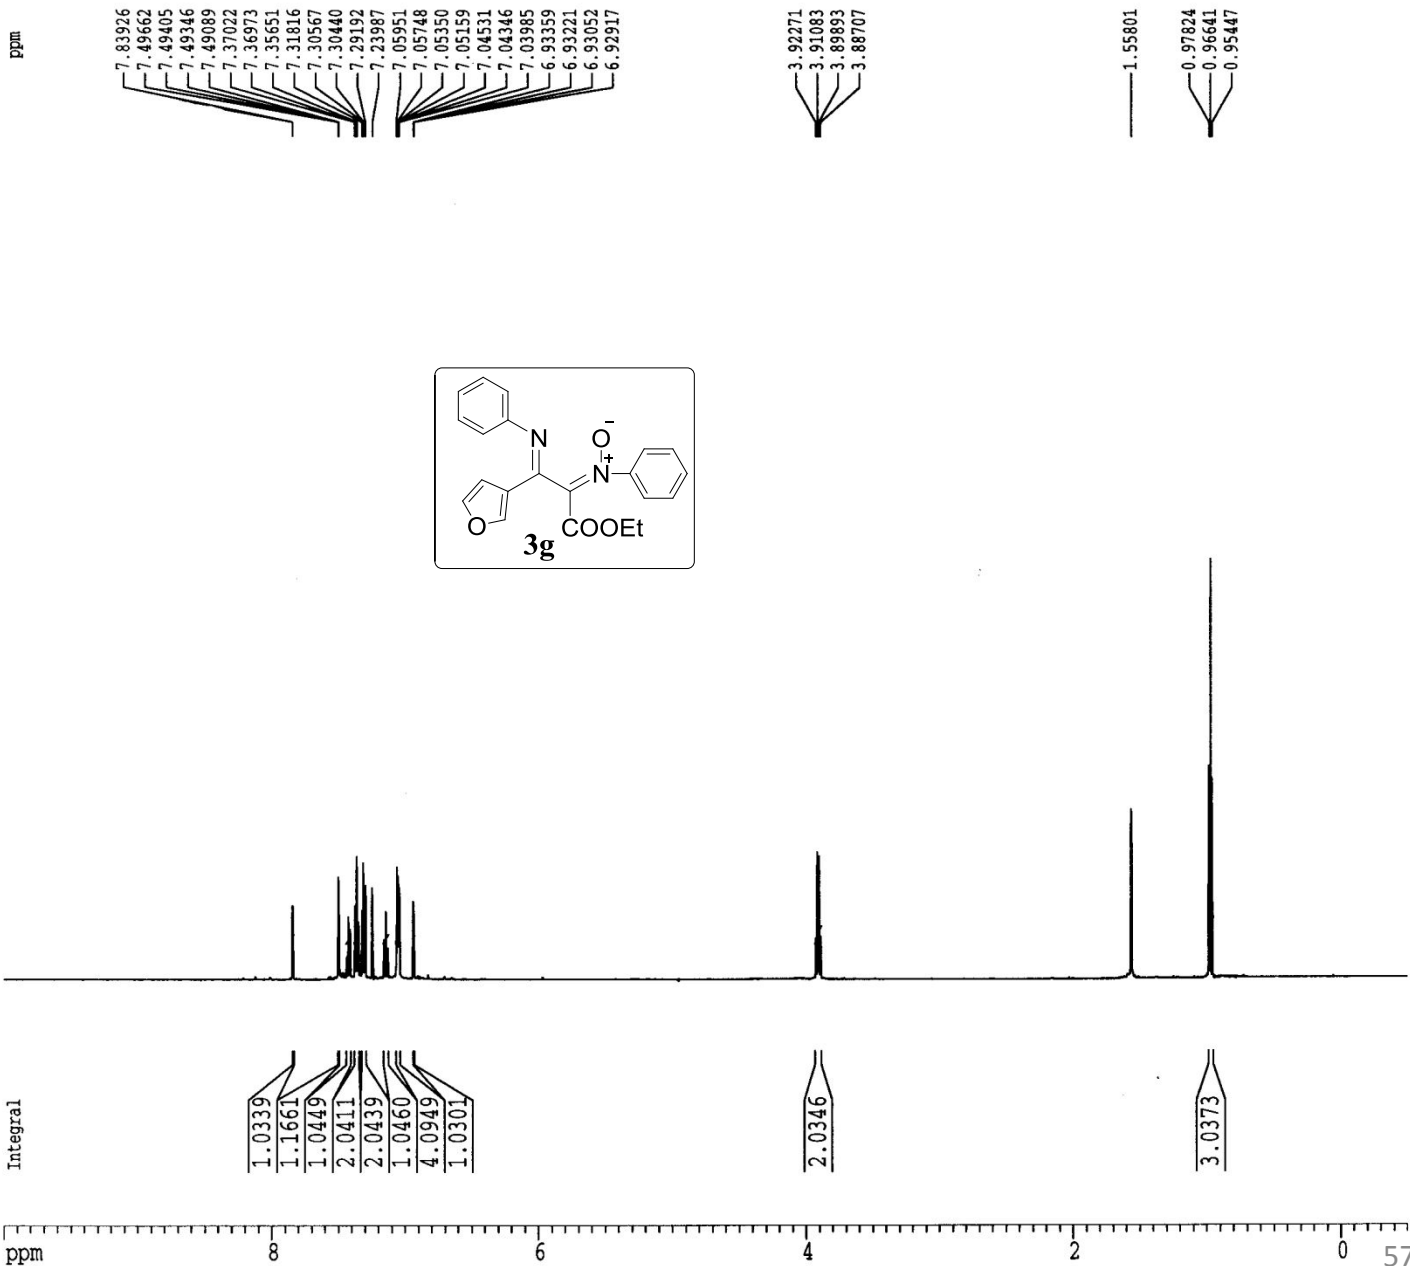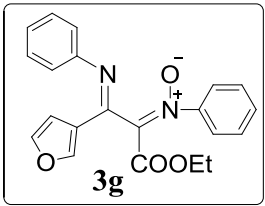

Current Data Parameters  
NAME RKS-1-192  
EXPNO 2  
PROCNO 1

F2 - Acquisition Parameters  
Date\_ 20130912  
Time 16.35  
INSTRUM spect  
PROBHD 5 mm QNP 1H/1  
PULPROG zgpg  
TD 32768  
SOLVENT CDCl3  
NS 410  
DS 0  
SWH 45045.047 Hz  
FIDRES 1.374666 Hz  
AQ 0.3637748 sec  
RG 2048  
DW 11.100 usec  
DE 6.50 usec  
TE 302.5 K  
D1 3.50000000 sec  
d11 0.03000000 sec  
DELTA 3.40000010 sec  
MCREST 0.00000000 sec  
MCWRK 0.01500000 sec

===== CHANNEL f1 =====  
NUC1 13C  
P1 4.80 usec  
PL1 0.00 dB  
SFO1 150.5849425 MHz

===== CHANNEL f2 =====  
CPDPRG2 waltz16  
NUC2 1H  
PCPD2 92.00 usec  
PL2 120.00 dB  
PL12 9.00 dB  
PL13 14.00 dB  
SFO2 598.8029940 MHz

F2 - Processing parameters  
SI 65536  
SF 150.5683821 MHz  
WDW EM  
SSB 0  
LB 3.00 Hz  
GB 0  
PC 0.50

1D NMR plot parameters  
CX 20.00 cm  
CY 4.00 cm  
F1P 200.000 ppm  
F1 30113.68 Hz  
F2P 0.000 ppm  
F2 0.00 Hz  
PPMCM 10.00000 ppm/cm  
HZCM 1505.68372 Hz/cm

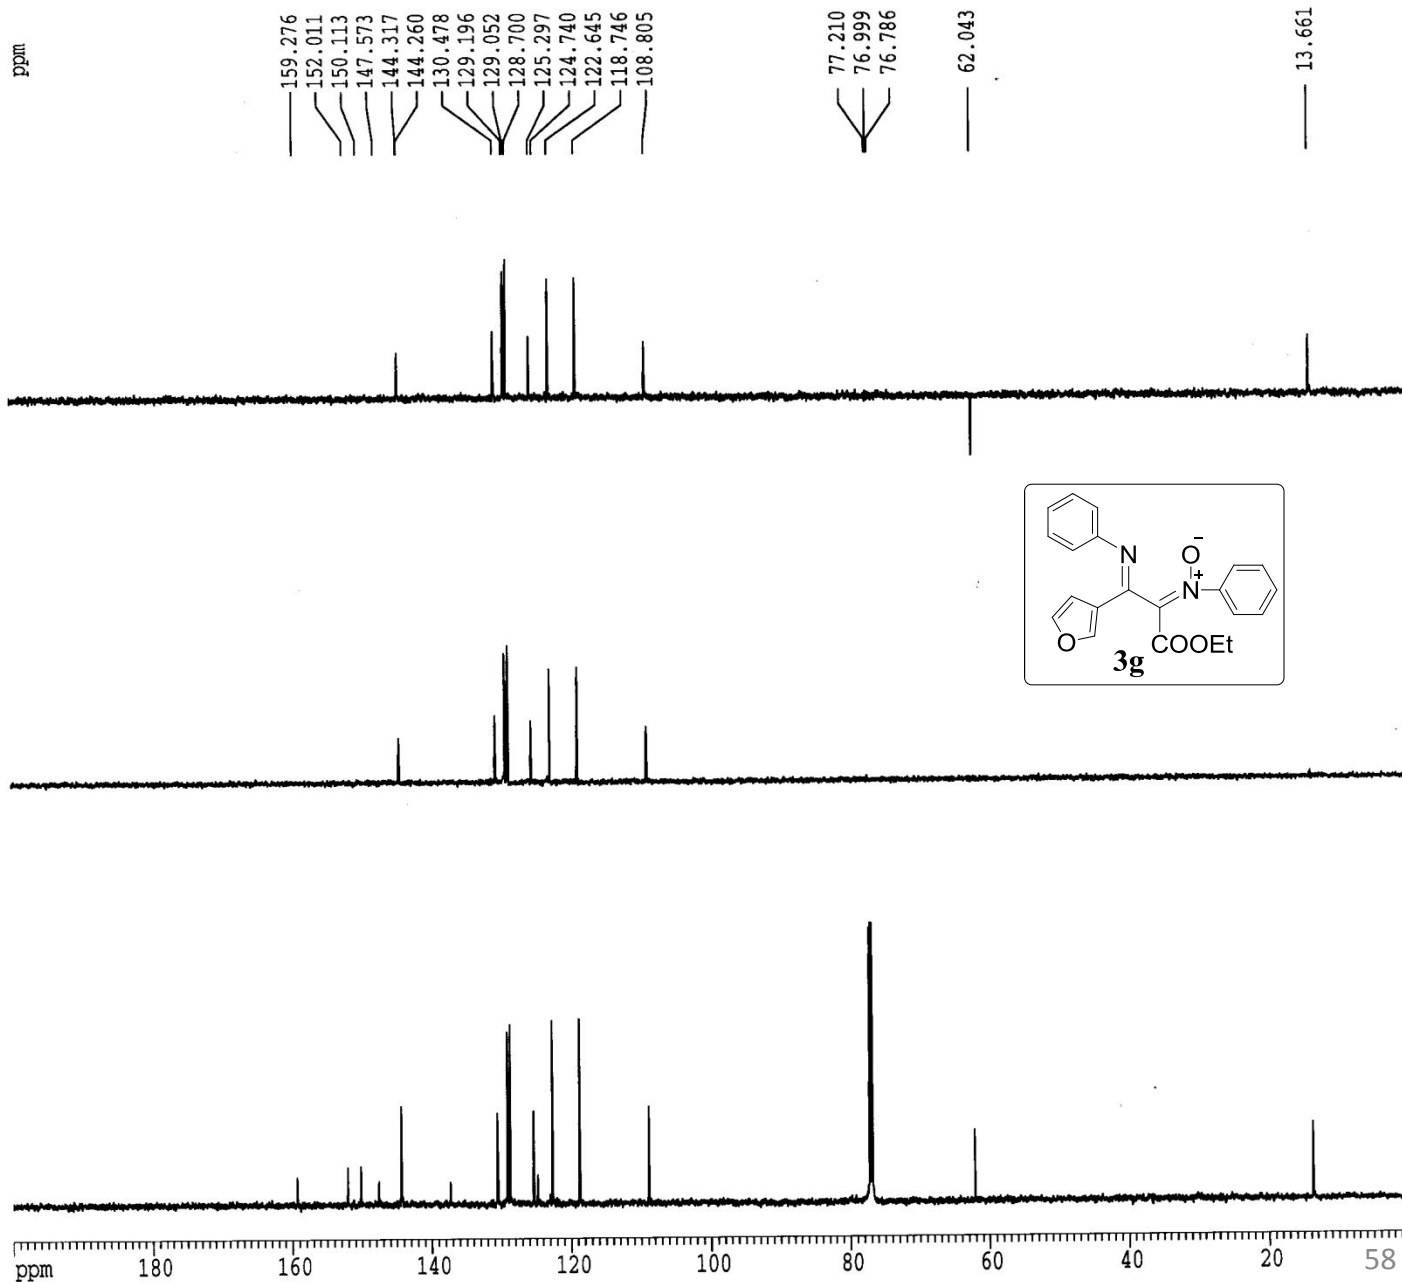

Current Data Parameters  
NAME RKS-1-148  
EXPNO 1  
PROCNO 1

F2 - Acquisition Parameters  
Date\_ 20130730  
Time 20.53  
INSTRUM spect  
PROBHD 5 mm QNP 1H/1  
PULPROG zg  
TD 32768  
SOLVENT CDC13  
NS 16  
DS 0  
SWH 8382.229 Hz  
FIDRES 0.255805 Hz  
AQ 1.9546613 sec  
RG 128  
DW 59.650 usec  
DE 6.50 usec  
TE 301.9 K  
D1 2.00000000 sec  
MCREST 0.00000000 sec  
MCWRK 0.01500000 sec

===== CHANNEL f1 =====  
NUC1 1H  
P1 10.00 usec  
PL1 0.00 dB  
SFO1 598.8029940 MHz

F2 - Processing parameters  
SI 32768  
SF 598.8000275 MHz  
WDW no  
SSB 0  
LB 0.00 Hz  
GB 0  
PC 1.00

1D NMR plot parameters  
CX 20.00 cm  
CY 6.00 cm  
FLP 10.000 ppm  
F1 5988.00 Hz  
F2P -0.500 ppm  
F2 -299.40 Hz  
PPMCM 0.52500 ppm/cm  
HZCM 314.37003 Hz/cm

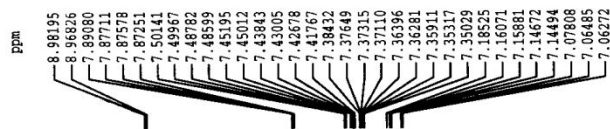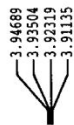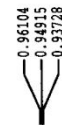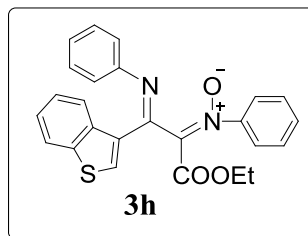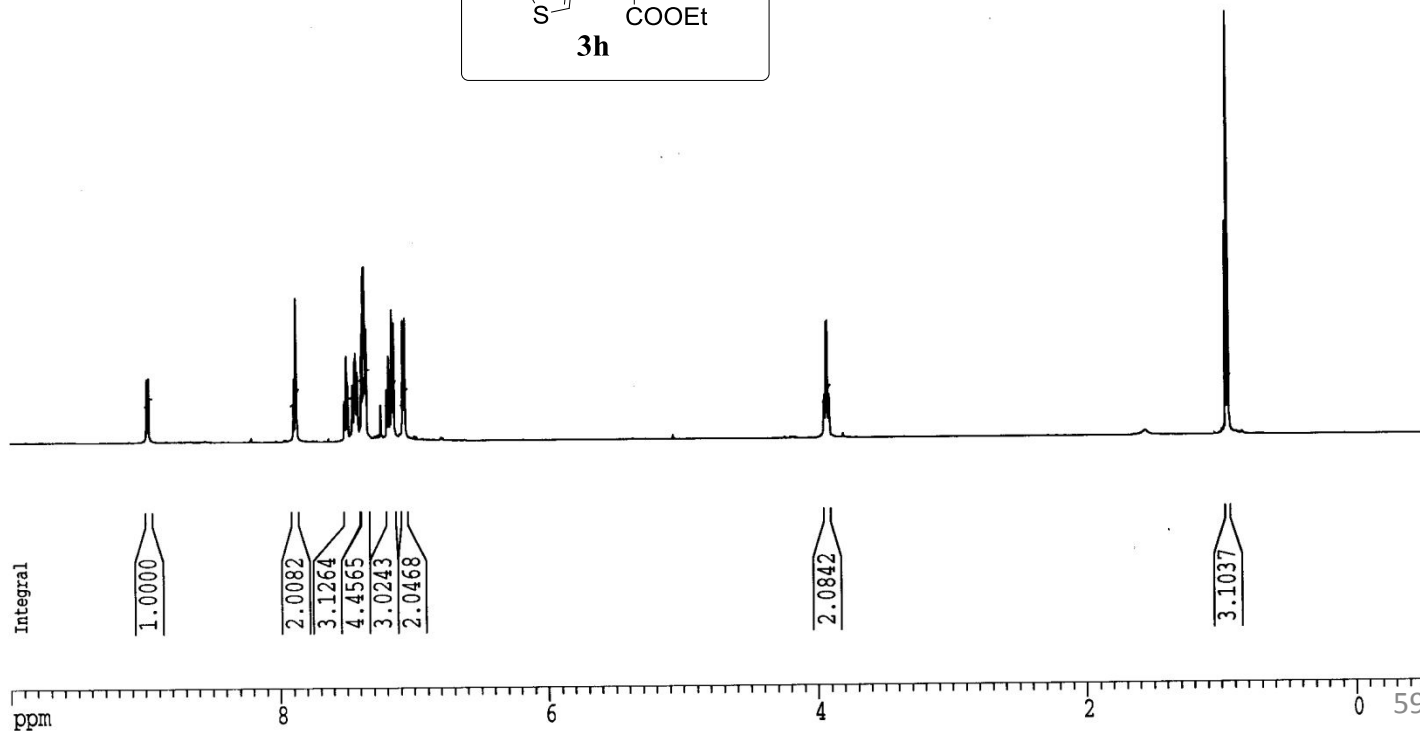

Current Data Parameters  
 NAME RKS-1-148  
 EXPNO 2  
 PROCNO 1

F2 - Acquisition Parameters  
 Date\_ 20130730  
 Time\_ 20.55  
 INSTRUM spect  
 PROBHD 5 mm QNP 1H/1  
 PULPROG zgpg  
 TD 32768  
 SOLVENT CDC13  
 NS 133  
 DS 0  
 SWH 45045.047 Hz  
 FIDRES 1.374666 Hz  
 AQ 0.3637748 sec  
 RG 2048  
 DW 11.100 usec  
 DE 6.50 usec  
 TE 302.3 K  
 D1 3.5000000 sec  
 d11 0.0300000 sec  
 DELTA 3.4000010 sec  
 MCREST 0.0000000 sec  
 MCWRK 0.0150000 sec

===== CHANNEL f1 =====  
 NUC1 13C  
 P1 4.80 usec  
 PL1 0.00 dB  
 SFO1 150.5849425 MHz

===== CHANNEL f2 =====  
 CPDPRG2 waltz16  
 NUC2 1H  
 PCPD2 92.00 usec  
 PL2 120.00 dB  
 PL12 9.00 dB  
 PL13 14.00 dB  
 SFO2 598.8029940 MHz

F2 - Processing parameters  
 SI 65536  
 SF 150.5683883 MHz  
 WDW EM  
 SSB 0  
 LB 3.00 Hz  
 GB 0  
 PC 0.50

1D NMR plot parameters  
 CX 20.00 cm  
 CY 4.00 cm  
 F1P 200.000 ppm  
 F1 30113.68 Hz  
 F2P 0.000 ppm  
 F2 0.00 Hz  
 PPMCM 10.0000 ppm/cm  
 HZCM 1505.68384 Hz/cm

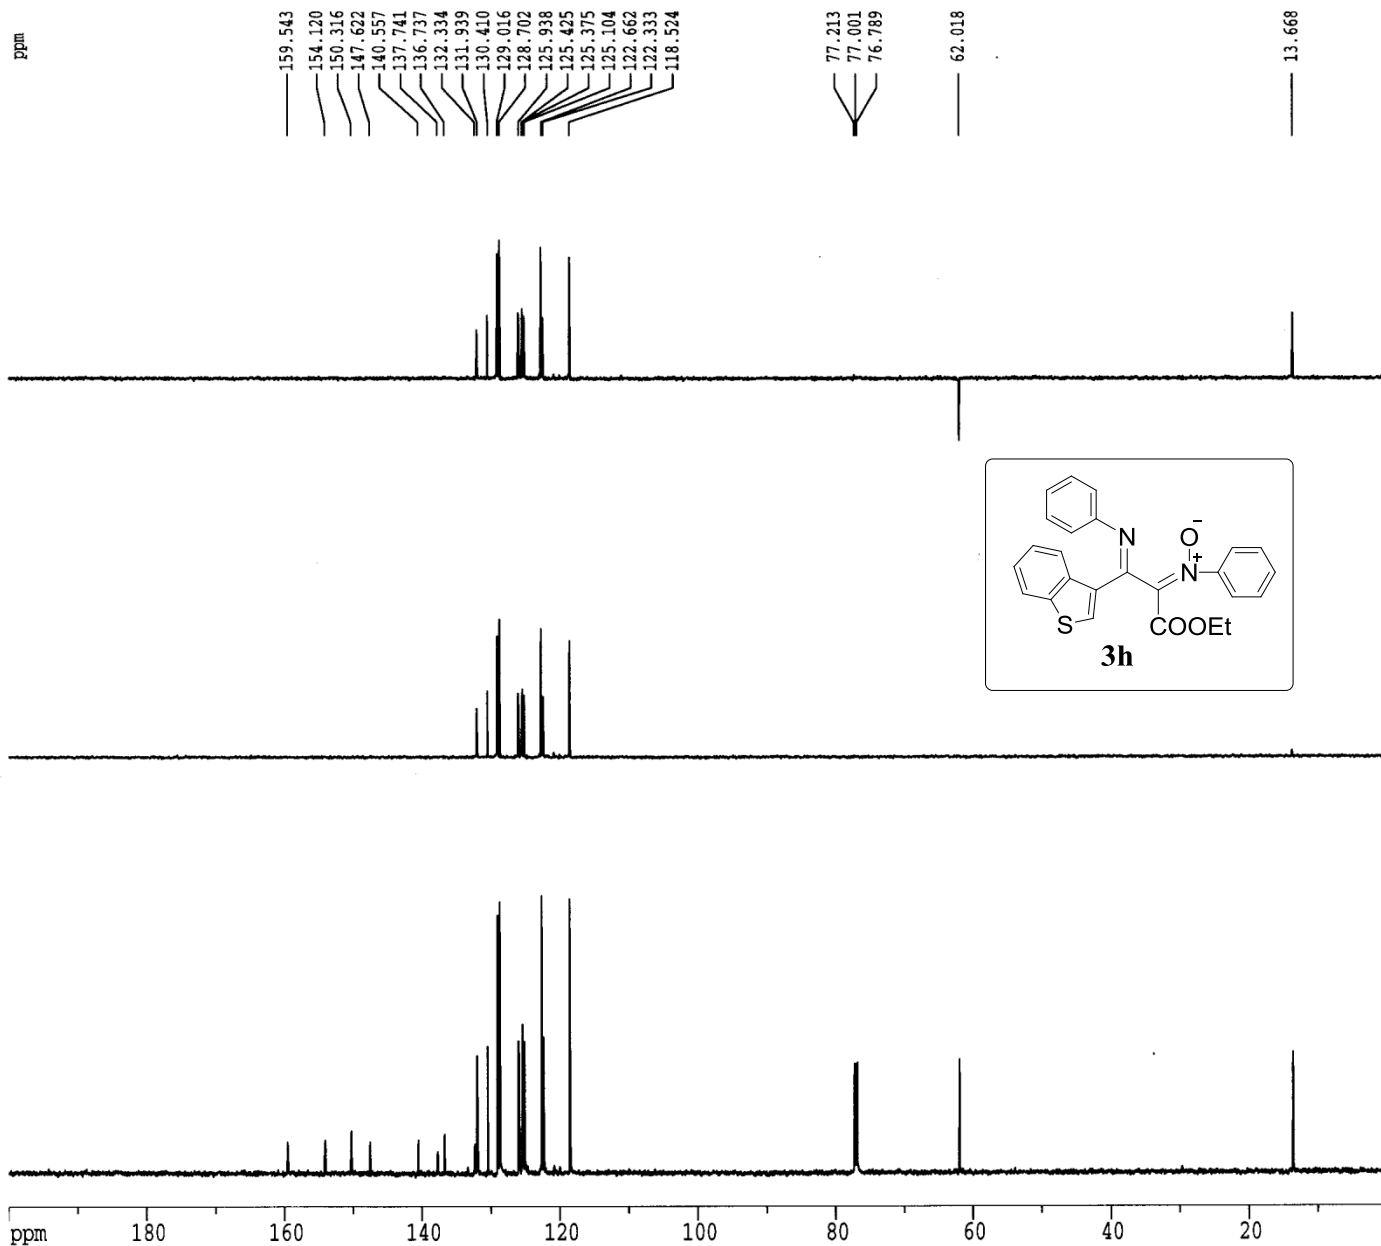

Current Data Parameters  
 NAME RKS-1-165  
 EXPNO 1  
 PROCNO 1

F2 - Acquisition Parameters

Date\_ 20130811  
 Time 20.45  
 INSTRUM spect  
 PROBHD 5 mm QNP 1H/1  
 PULPROG zg  
 TD 32768  
 SOLVENT CDCl3  
 NS 16  
 DS 0  
 SWH 8382.229 Hz  
 FIDRES 0.255805 Hz  
 AQ 1.9546613 sec  
 RG 256  
 DW 59.650 usec  
 DE 6.50 usec  
 TE 303.8 K  
 D1 2.00000000 sec  
 MCREST 0.00000000 sec  
 MCWRK 0.01500000 sec

===== CHANNEL f1 =====  
 NUC1 1H  
 P1 10.00 usec  
 PL1 3.00 dB  
 SFO1 598.8035928 MHz

F2 - Processing parameters  
 SI 32768  
 SF 598.8000285 MHz  
 WDW EM  
 SSB 0  
 LB 0.30 Hz  
 GB 0  
 PC 1.00

1D NMR plot parameters  
 CX 20.00 cm  
 CY 5.00 cm  
 F1P 10.000 ppm  
 F1 5988.00 Hz  
 F2P -0.500 ppm  
 F2 -299.40 Hz  
 PPMCM 0.52500 ppm/cm  
 HZCM 314.37003 Hz/cm

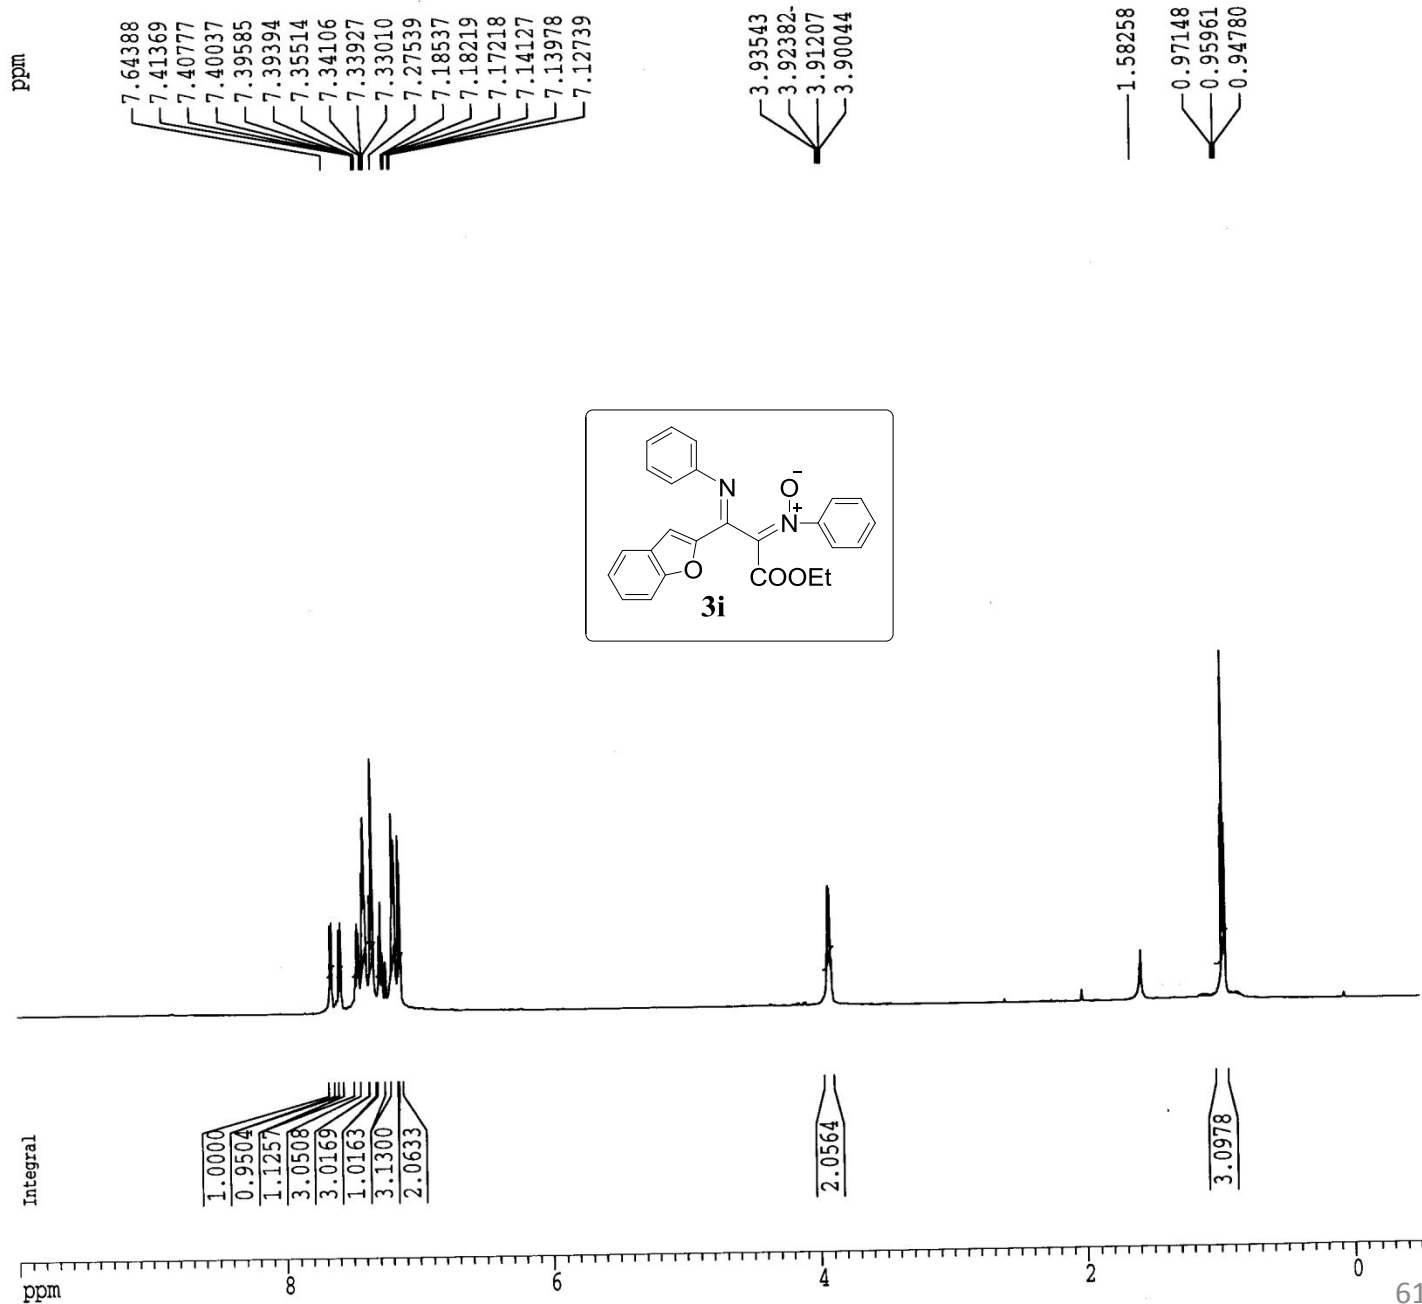

Current Data Parameters  
NAME RKS-1-165  
EXPNO 2  
PROCNO 1

F2 - Acquisition Parameters  
Date\_ 20130811  
Time 20.28  
INSTRUM spect  
PROBHD 5 mm QNP 1H/1  
PULPROG zgpg  
TD 32768  
SOLVENT CDCl3  
NS 148  
DS 0  
SWH 45045.047 Hz  
FIDRES 1.374666 Hz  
AQ 0.3637748 sec  
RG 2048  
DW 11.100 usec  
DE 6.50 usec  
TE 304.6 K  
D1 3.5000000 sec  
d11 0.0300000 sec  
DELTA 3.4000010 sec  
MCREST 0.0000000 sec  
MCWRK 0.0150000 sec

=====  
CHANNEL f1  
NUC1 13C  
P1 4.80 usec  
PL1 0.00 dB  
SFO1 150.5849425 MHz

=====  
CHANNEL f2  
CPDPRG2 waltz16  
NUC2 1H  
PCPD2 92.00 usec  
PL2 120.00 dB  
PL12 9.00 dB  
PL13 14.00 dB  
SFO2 598.8029940 MHz

F2 - Processing parameters  
SI 65536  
SF 150.5683855 MHz  
WDW EM  
SSB 0  
LB 3.00 Hz  
GB 0  
PC 0.50

1D NMR plot parameters  
CX 20.00 cm  
CY 4.00 cm  
F1P 200.000 ppm  
F1 30113.68 Hz  
F2P 0.000 ppm  
F2 0.00 Hz  
PPMCM 10.00000 ppm/cm  
HZCM 1505.68384 Hz/cm

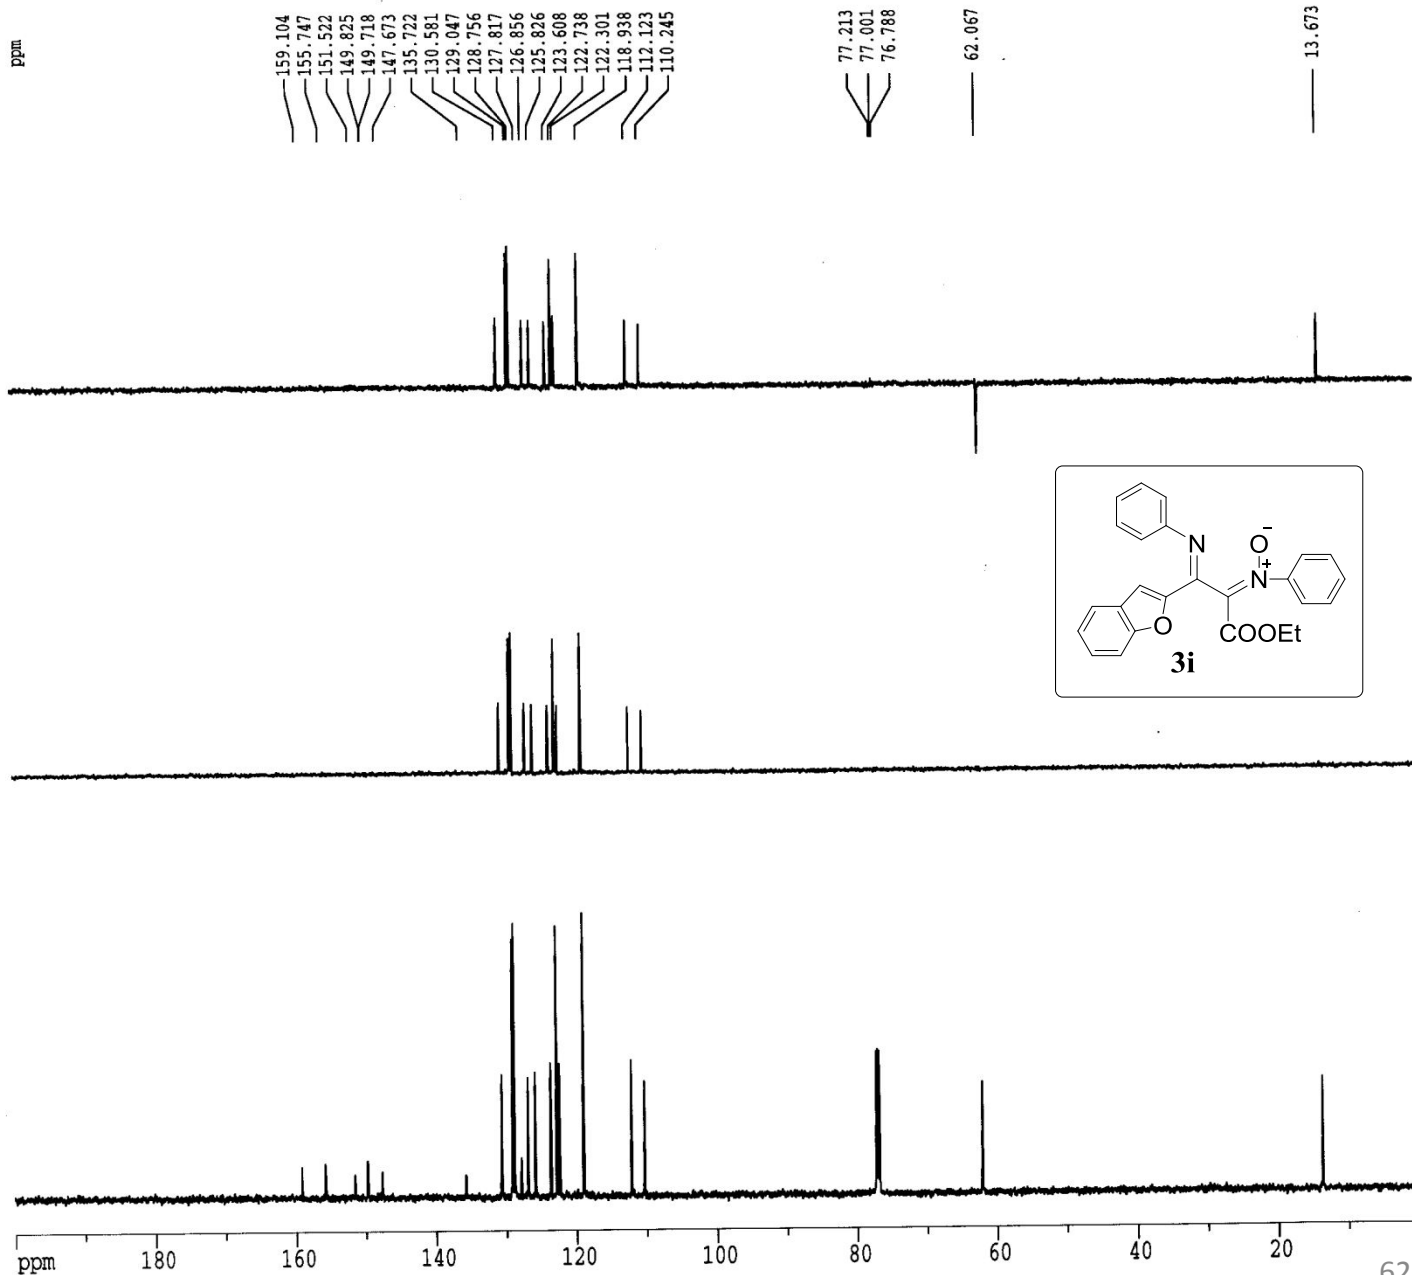

Current Data Parameters  
 NAME RKS-1-146  
 EXPNO 1  
 PROCNO 1

F2 - Acquisition Parameters

Date\_ 20130728  
 Time 15.59  
 INSTRUM spect  
 PROBHD 5 mm QNP 1H/1  
 PULPROG zg  
 TD 32768  
 SOLVENT CDCl3  
 NS 16  
 DS 0  
 SWH 8382.229 Hz  
 FIDRES 0.255805 Hz  
 AQ 1.9546613 sec  
 RG 128  
 DW 59.650 usec  
 DE 6.50 usec  
 TE 300.7 K  
 D1 1.00000000 sec  
 MCREST 0.00000000 sec  
 MCWRK 0.01500000 sec

===== CHANNEL f1 =====

NUC1 1H  
 P1 10.00 usec  
 PL1 0.00 dB  
 SFO1 598.8029940 MHz

F2 - Processing parameters

SI 32768  
 SF 598.8000301 MHz  
 WDW no  
 SSB 0  
 LB 0.00 Hz  
 GB 0  
 PC 1.00

1D NMR plot parameters

CX 20.00 cm  
 CY 6.00 cm  
 F1P 10.000 ppm  
 F1 5988.00 Hz  
 F2P -0.500 ppm  
 F2 -299.40 Hz  
 PPMCM 0.52500 ppm/cm  
 HZCM 314.37003 Hz/cm

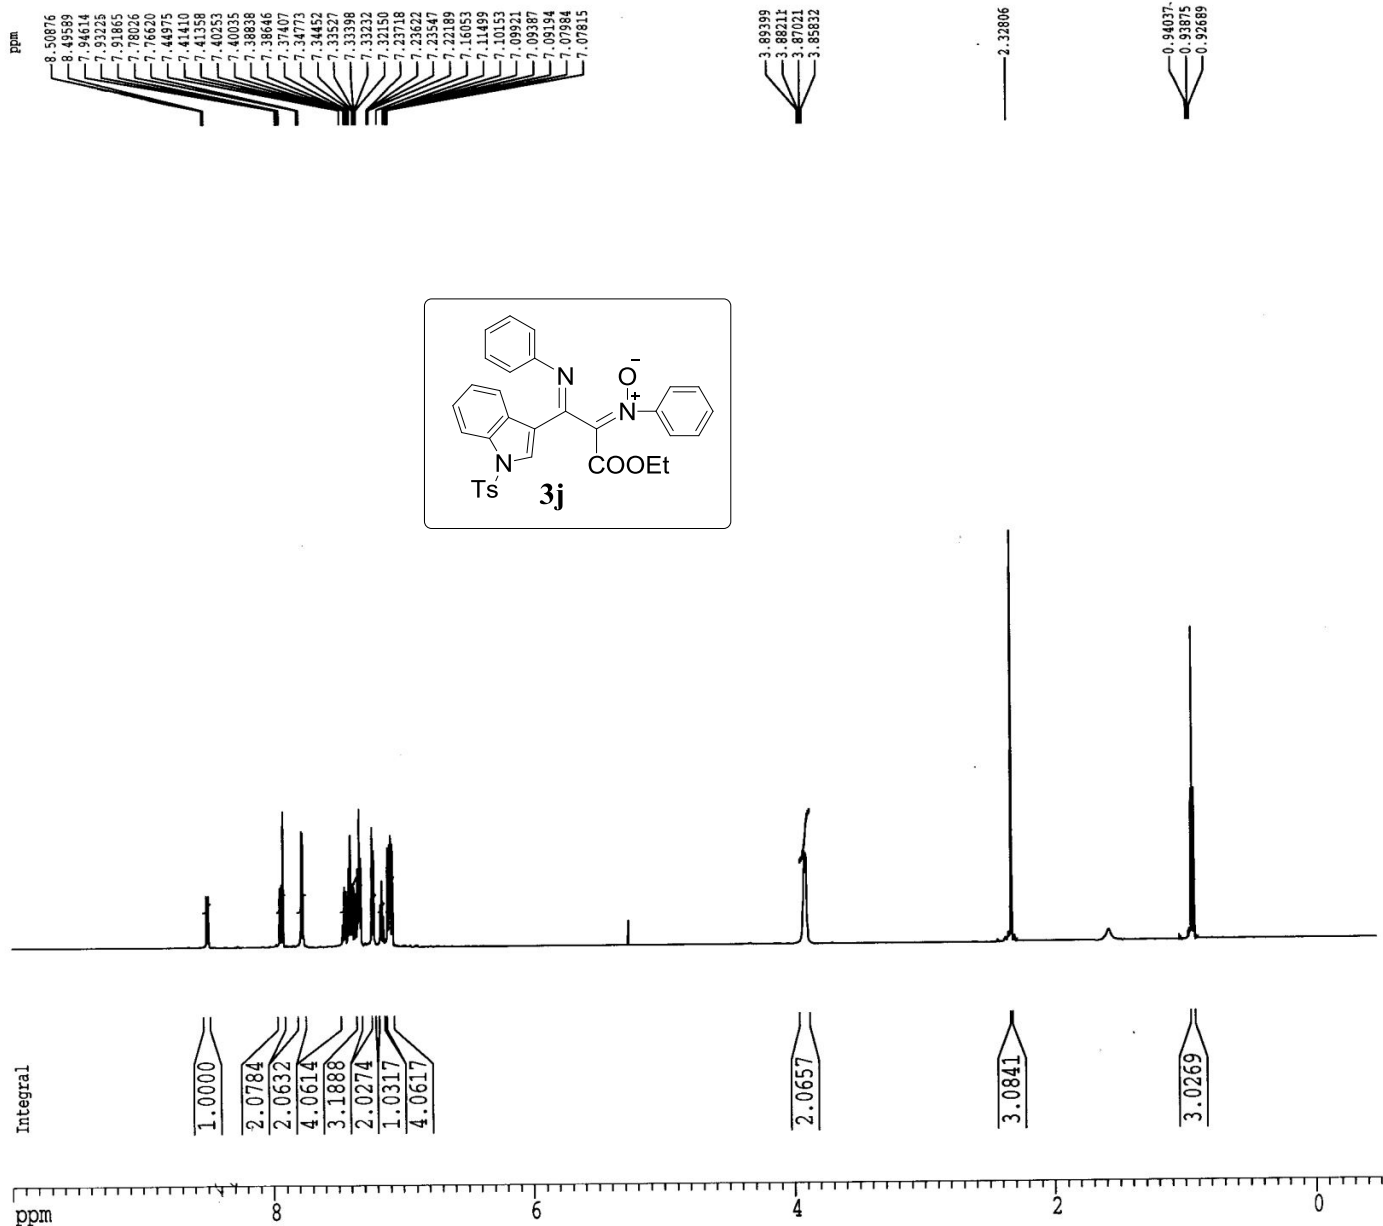

Current Data Parameters  
 NAME RKS-1-146  
 EXPNO 2  
 PROCNO 1

F2 - Acquisition Parameters  
 Date\_ 20130728  
 Time 16.19  
 INSTRUM spect  
 PROBHD 5 mm QNP 1H/1  
 PULPROG zgpg  
 TD 32768  
 SOLVENT CDCl3  
 NS 300  
 DS 0  
 SWH 45045.047 Hz  
 FIDRES 1.374666 Hz  
 AQ 0.3637748 sec  
 RG 2048  
 DW 11.100 usec  
 DE 6.500 usec  
 TE 301.5 K  
 D1 3.50000000 sec  
 d11 0.03000000 sec  
 DELTA 3.40000010 sec  
 MCREST 0.00000000 sec  
 MCWRK 0.01500000 sec

==== CHANNEL f1 =====  
 NUC1 13C  
 P1 4.80 usec  
 PL1 0.00 dB  
 SFO1 150.5849425 MHz

==== CHANNEL f2 =====  
 CPDPRG2 waltz16  
 NUC2 1H  
 PCPD2 92.00 usec  
 PL2 120.00 dB  
 PL12 9.00 dB  
 PL13 14.00 dB  
 SFO2 598.8029940 MHz

F2 - Processing parameters  
 SI 65536  
 SF 150.5683876 MHz  
 WDW EM  
 SSB 0  
 LB 3.00 Hz  
 GB 0  
 PC 0.50

1D NMR plot parameters  
 CX 20.00 cm  
 CY 4.00 cm  
 F1P 200.000 ppm  
 F1 30113.68 Hz  
 F2P 0.000 ppm  
 F2 0.00 Hz  
 PPMCM 10.00000 ppm/cm  
 HZCM 1505.68384 Hz/cm

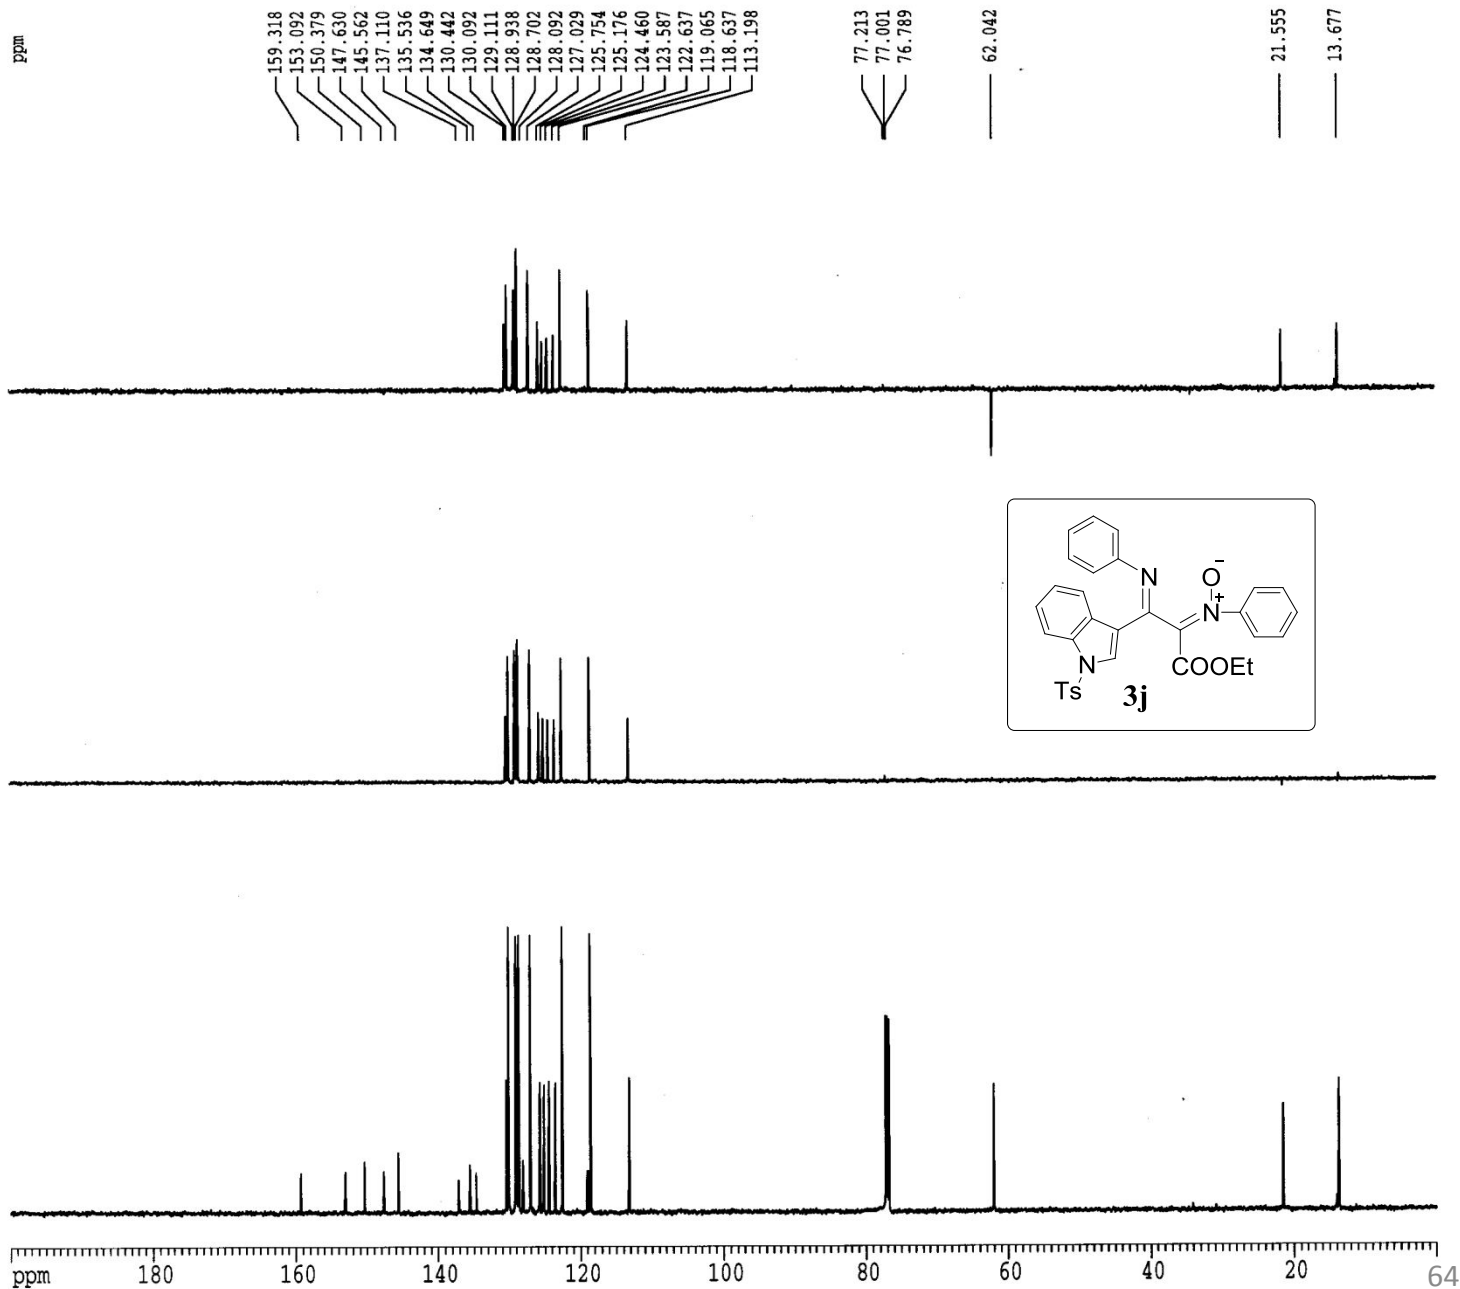



Current Data Parameters  
 NAME RKS-1-1-108  
 EXPNO 1  
 PROCNO 1

F2 - Acquisition Parameters  
 Date\_ 20130610  
 Time 20.19  
 INSTRUM spect  
 PROBHD 5 mm QNP 1H/1  
 PULPROG zg  
 TD 32768  
 SOLVENT CDCl3  
 NS 16  
 DS 0  
 SWH 8382.229 Hz  
 FIDRES 0.255805 Hz  
 AQ 1.9546613 sec  
 RG 128  
 DW 59.650 usec  
 DE 6.50 usec  
 TE 299.6 K  
 D1 1.00000000 sec  
 MCREST 0.00000000 sec  
 MCWRK 0.01500000 sec

===== CHANNEL f1 =====  
 NUC1 1H  
 P1 10.00 usec  
 PL1 0.00 dB  
 SF01 598.8026946 MHz

F2 - Processing parameters  
 SI 32768  
 SF 598.8000269 MHz  
 WDW no  
 SSB 0  
 LB 0.00 Hz  
 GB 0  
 PC 1.00

1D NMR plot parameters  
 CX 20.00 cm  
 CY 6.00 cm  
 F1P 10.000 ppm  
 F1 5988.00 Hz  
 F2P -0.500 ppm  
 F2 -299.40 Hz  
 PPMCM 0.52500 ppm/cm  
 HZCM 314.37003 Hz/cm

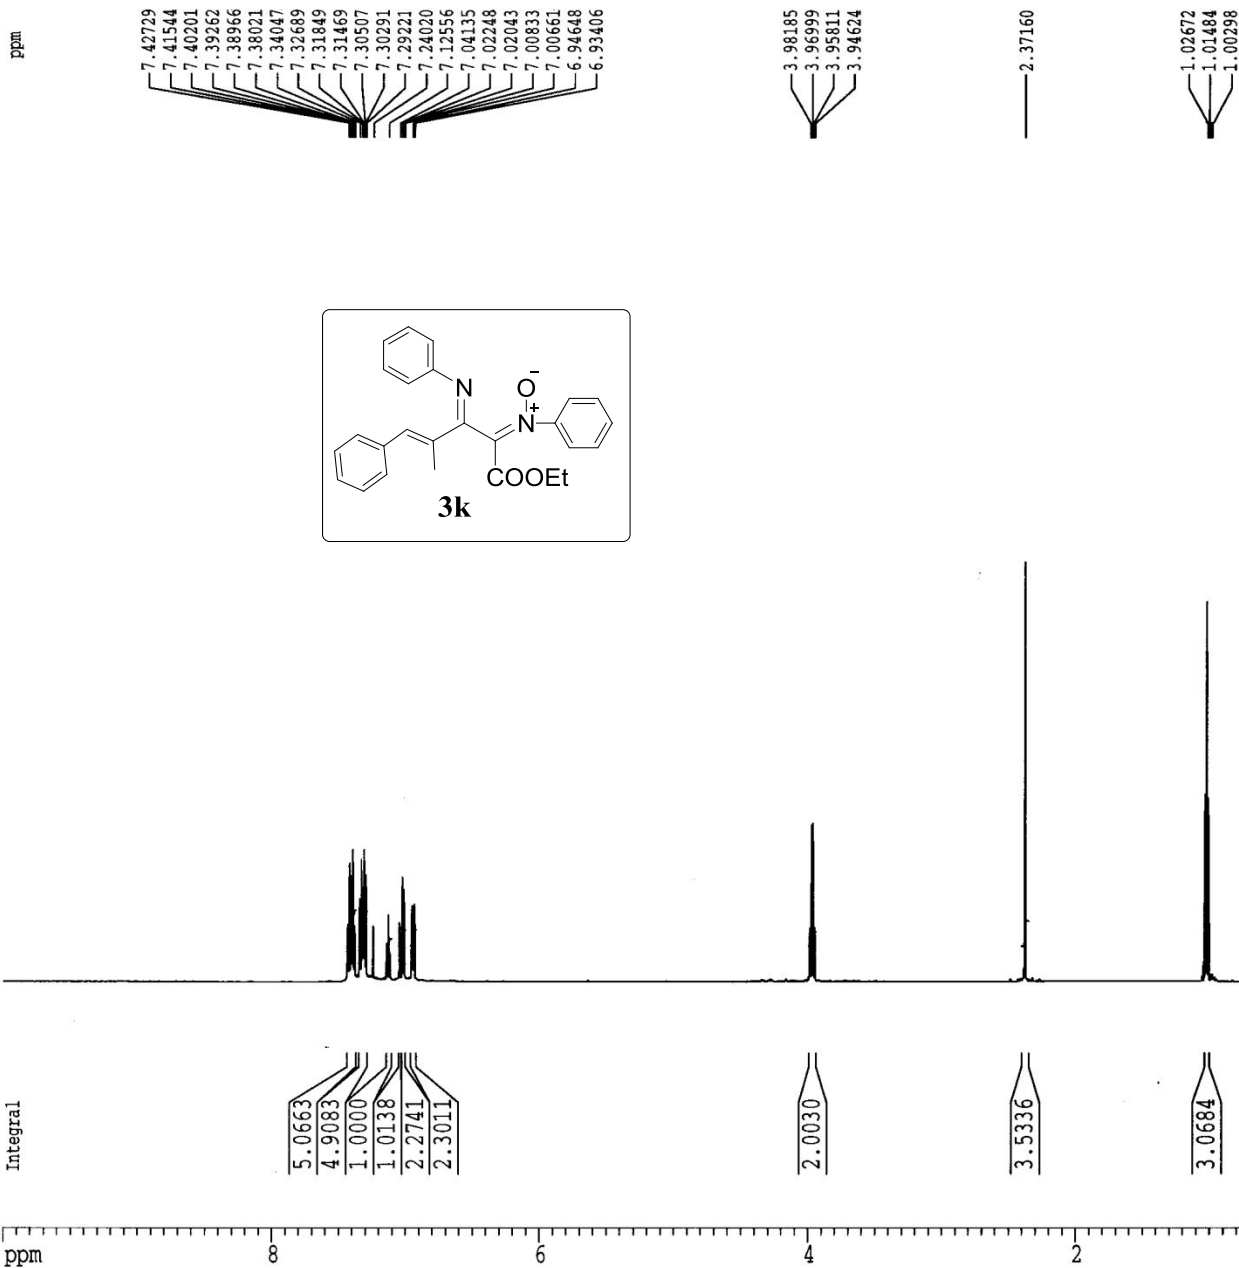

Current Data Parameters  
NAME RKS-1-1-108  
EXPNO 2  
PROCNO 1

F2 - Acquisition Parameters  
Date\_ 20130610  
Time 20.38  
INSTRUM spect  
PROBHD 5 mm QNP 1H/1  
PULPROG zgpg  
TD 32768  
SOLVENT CDCl3  
NS 300  
DS 0  
SWH 45045.047 Hz  
FIDRES 1.374666 Hz  
AQ 0.3637748 sec  
RG 2048  
DW 11.100 usec  
DE 6.50 usec  
TE 300.9 K  
D1 3.50000000 sec  
d11 0.03000000 sec  
DELTA 3.40000010 sec  
MCREST 0.00000000 sec  
MCWRK 0.01500000 sec

===== CHANNEL f1 =====  
NUC1 13C  
P1 4.80 usec  
PL1 0.00 dB  
SFO1 150.5849425 MHz

===== CHANNEL f2 =====  
CPDPRG2 waltz16  
NUC2 1H  
PCPD2 92.00 usec  
PL2 120.00 dB  
PL12 9.00 dB  
PL13 14.00 dB  
SFO2 598.8029940 MHz

F2 - Processing parameters  
SI 65536  
SF 150.5683841 MHz  
WDW EM  
SSB 0  
LB 3.00 Hz  
GB 0  
PC 1.00

1D NMR plot parameters  
CX 20.00 cm  
CY 4.50 cm  
F1P 200.000 ppm  
F1 30113.68 Hz  
F2P 0.000 ppm  
F2 0.00 Hz  
PPMCM 10.00000 ppm/cm  
HZCM 1505.68384 Hz/cm

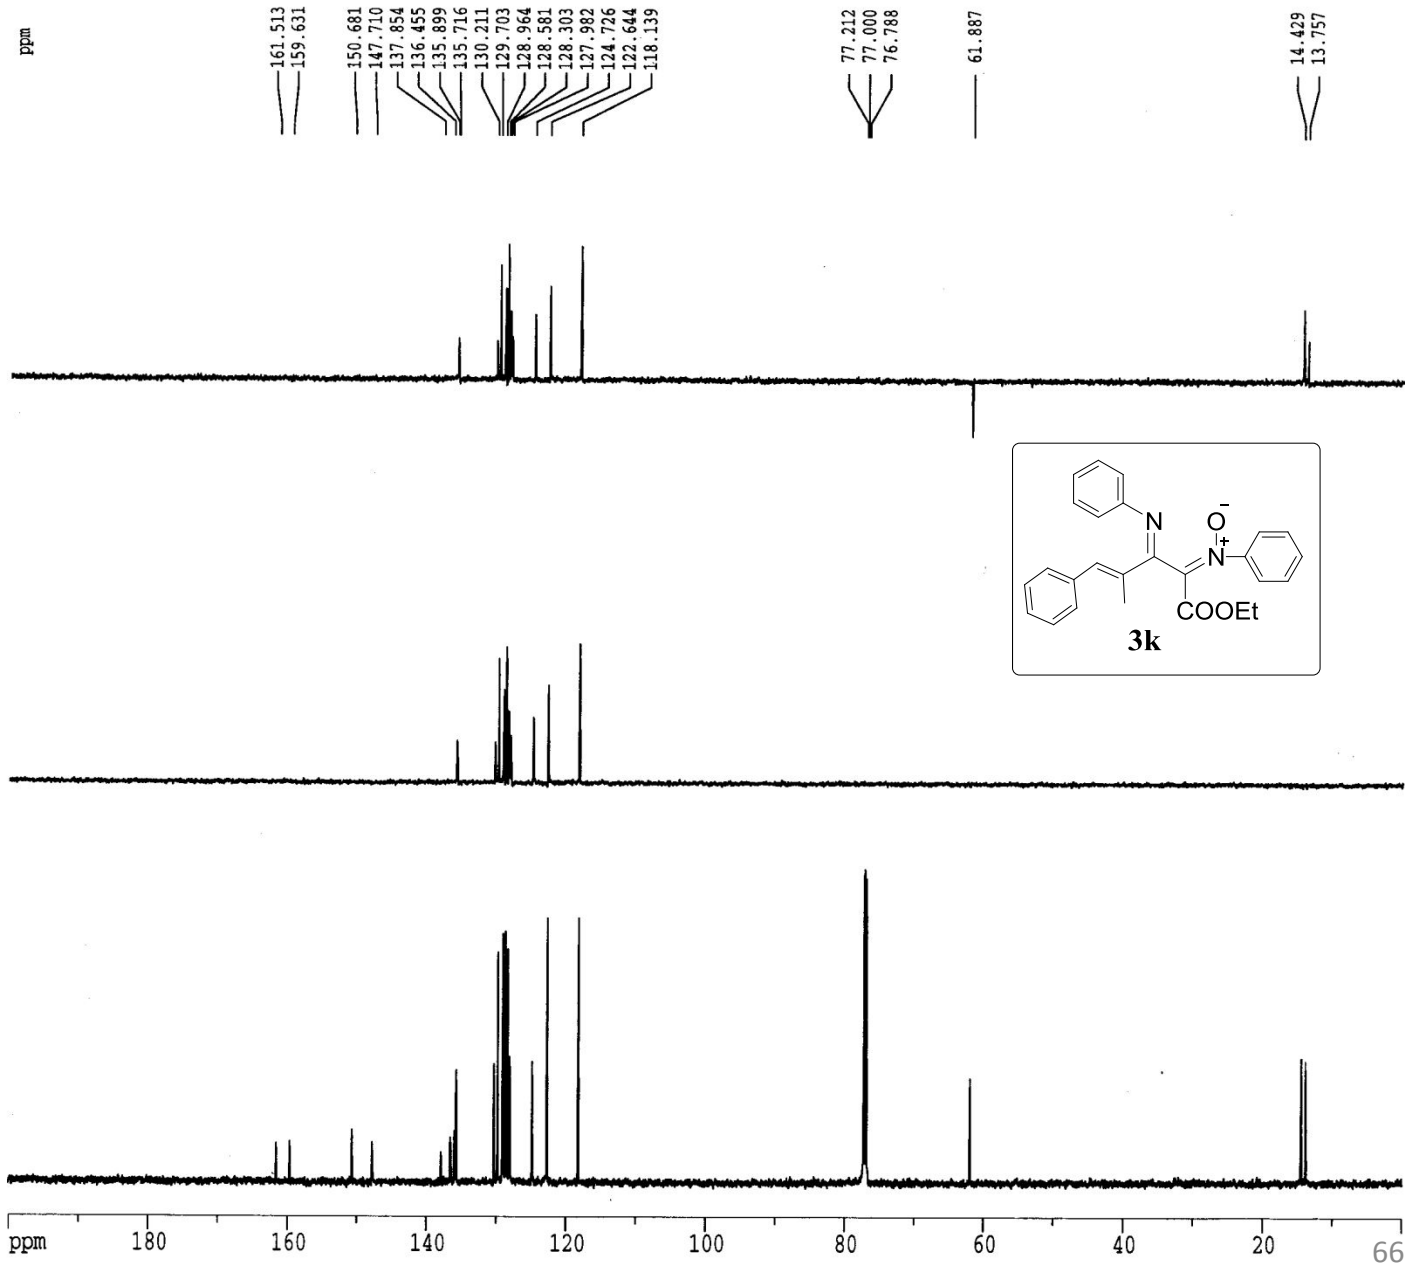

Current Data Parameters  
 NAME RKS-1-157-F  
 EXPNO 1  
 PROCNO 1

F2 - Acquisition Parameters  
 Date\_ 20140828  
 Time 22.26  
 INSTRUM spect  
 PROBHD 5 mm QNP 1H/1  
 PULPROG zg  
 TD 33556  
 SOLVENT CDCl3  
 NS 16  
 DS 0  
 SWH 8389.262 Hz  
 FIDRES 0.250008 Hz  
 AQ 1.9999876 sec  
 RG 512  
 DW 59.600 usec  
 DE 6.50 usec  
 TE 303.8 K  
 DL 2.00000000 sec  
 MCREST 0.00000000 sec  
 MCWRK 0.01500000 sec

===== CHANNEL f1 =====  
 NUC1 1H  
 P1 10.00 usec  
 PL1 0.00 dB  
 SFO1 598.7029935 MHz

F2 - Processing parameters  
 SI 32768  
 SF 598.7000263 MHz  
 WDW no  
 SSB 0  
 LB 0.00 Hz  
 GB 0  
 PC 1.00

1D NMR plot parameters  
 CX 20.00 cm  
 CY 6.00 cm  
 FIP 10.000 ppm  
 F1 5987.00 Hz  
 F2P -0.500 ppm  
 F2 -299.35 Hz  
 PPMCM 0.52500 ppm/cm  
 HZCM 314.31750 Hz/cm

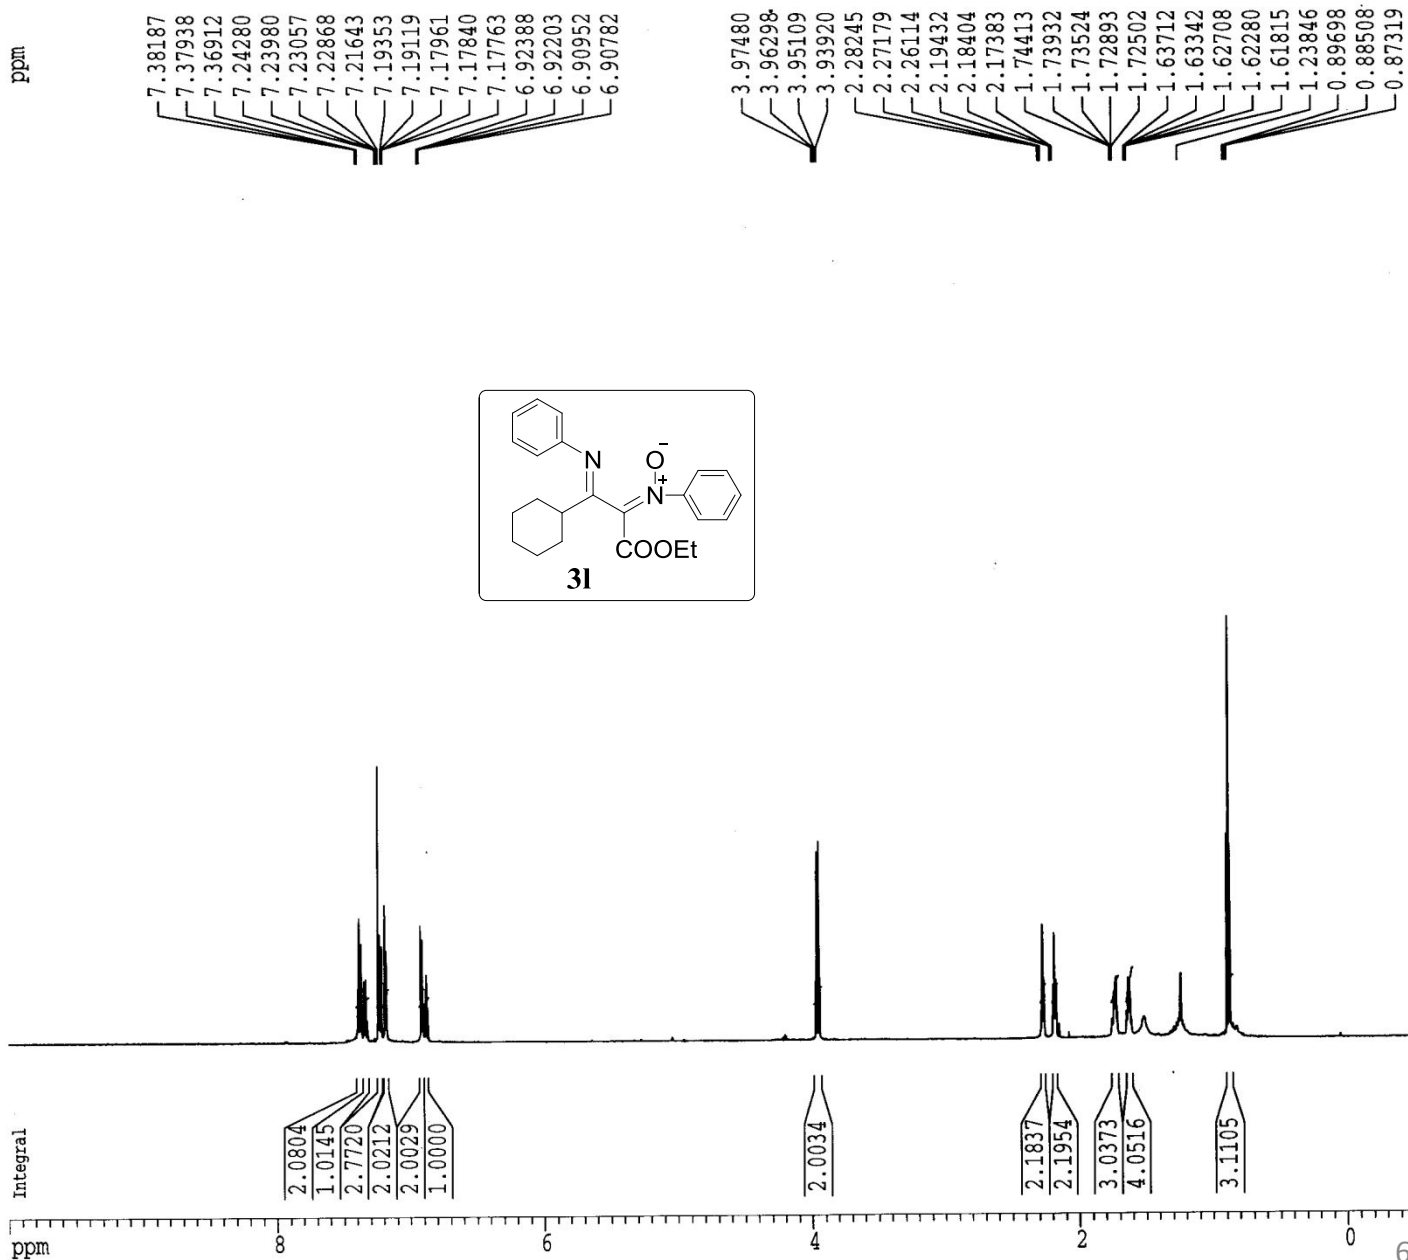

Current Data Parameters  
 NAME RKS-1-157-F  
 EXPNO 2  
 PROCNO 1

F2 - Acquisition Parameters

Date\_ 20140829  
 Time 5.09  
 INSTRUM spect  
 PROBHD 5 mm QNP 1H/1  
 PULPROG zgpg  
 TD 32768  
 SOLVENT CDCl3  
 NS 6144  
 DS 0  
 SWH 45045.047 Hz  
 FIDRES 1.374666 Hz  
 AQ 0.3637748 sec  
 RG 2048  
 DW 11.100 usec  
 DE 6.50 usec  
 TE 305.2 K  
 D1 3.5000000 sec  
 d11 0.03000000 sec  
 DELTA 3.40000010 sec  
 MCREST 0.00000000 sec  
 MCWRK 0.01500000 sec

ppm

161.762

143.989

139.821

137.275

128.788

128.411

127.796

127.336

120.452

118.329

111.611

77.212

77.000

76.788

58.974

23.321

23.246

23.132

22.759

13.837

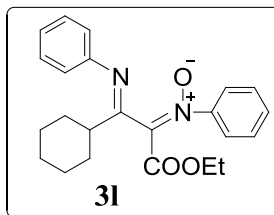

===== CHANNEL f1 =====  
 NUC1 13C  
 P1 4.80 usec  
 PL1 0.00 dB  
 SFO1 150.5597948 MHz

===== CHANNEL f2 =====  
 CPDPRG2 waltz16  
 NUC2 1H  
 PCPD2 92.00 usec  
 PL2 120.00 dB  
 PL12 9.00 dB  
 PL13 14.00 dB  
 SFO2 598.7029935 MHz

F2 - Processing parameters  
 SI 65536  
 SF 150.5432335 MHz  
 WDW EM  
 SSB 0  
 LB 3.00 Hz  
 GB 0  
 PC 1.00

1D NMR plot parameters  
 CX 20.00 cm  
 CY 10.00 cm  
 FLP 200.000 ppm  
 F1 30108.65 Hz  
 F2P 0.000 ppm  
 F2 0.00 Hz  
 PPMCM 10.00000 ppm/cm

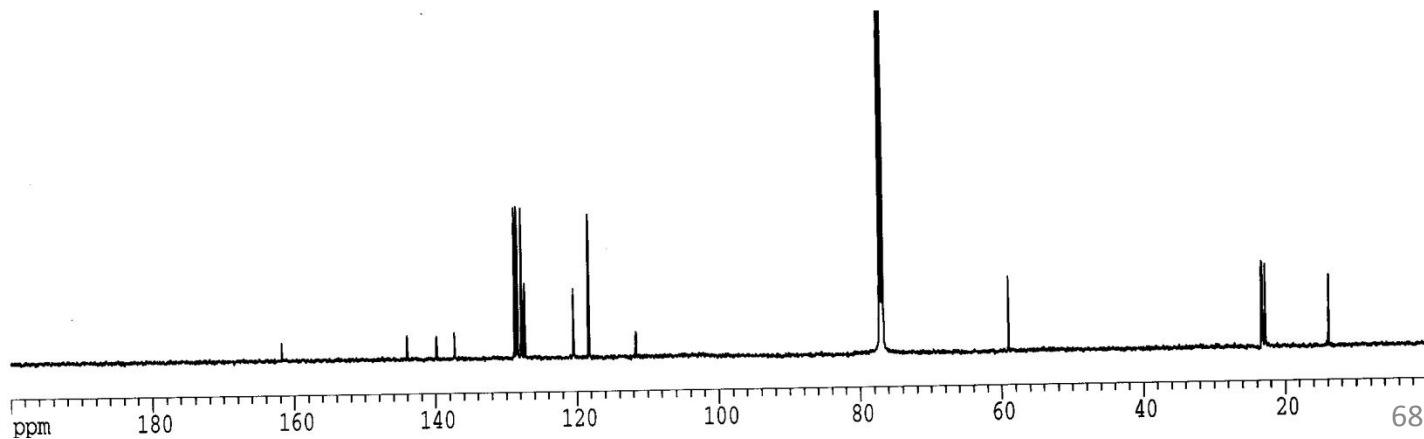

Current Data Parameters  
 NAME RKS-1-166-P  
 EXPNO 1  
 PROCNO 1

F2 - Acquisition Parameters  
 Date\_ 20140801  
 Time 12.19  
 INSTRUM spect  
 PROBHD 5 mm QNP 1H/1  
 PULPROG zg  
 TD 33556  
 SOLVENT CDCl3  
 NS 16  
 DS 0  
 SMH 9615.385 Hz  
 FIDRES 0.236547 Hz  
 AQ 1.7449620 sec  
 RG 512  
 DW 52.000 usec  
 DE 6.50 usec  
 TE 301.8 K  
 D1 2.00000000 sec  
 MCREST 0.00000000 sec  
 MCWRK 0.01500000 sec

===== CHANNEL f1 =====  
 NUC1 1H  
 P1 10.00 usec  
 PL1 0.00 dB  
 SFO1 598.7029935 MHz

F2 - Processing parameters  
 SI 32768  
 SF 598.7000260 MHz  
 WDW no  
 SSB 0  
 LB 0.00 Hz  
 GB 0  
 PC 1.00

1D NMR plot parameters  
 CX 20.00 cm  
 CY 6.00 cm  
 F1P 10.000 ppm  
 F1 5987.00 Hz  
 F2P -0.500 ppm  
 F2 -299.35 Hz  
 PPMCM 0.52500 ppm/cm  
 HZCM 314.31750 Hz/cm

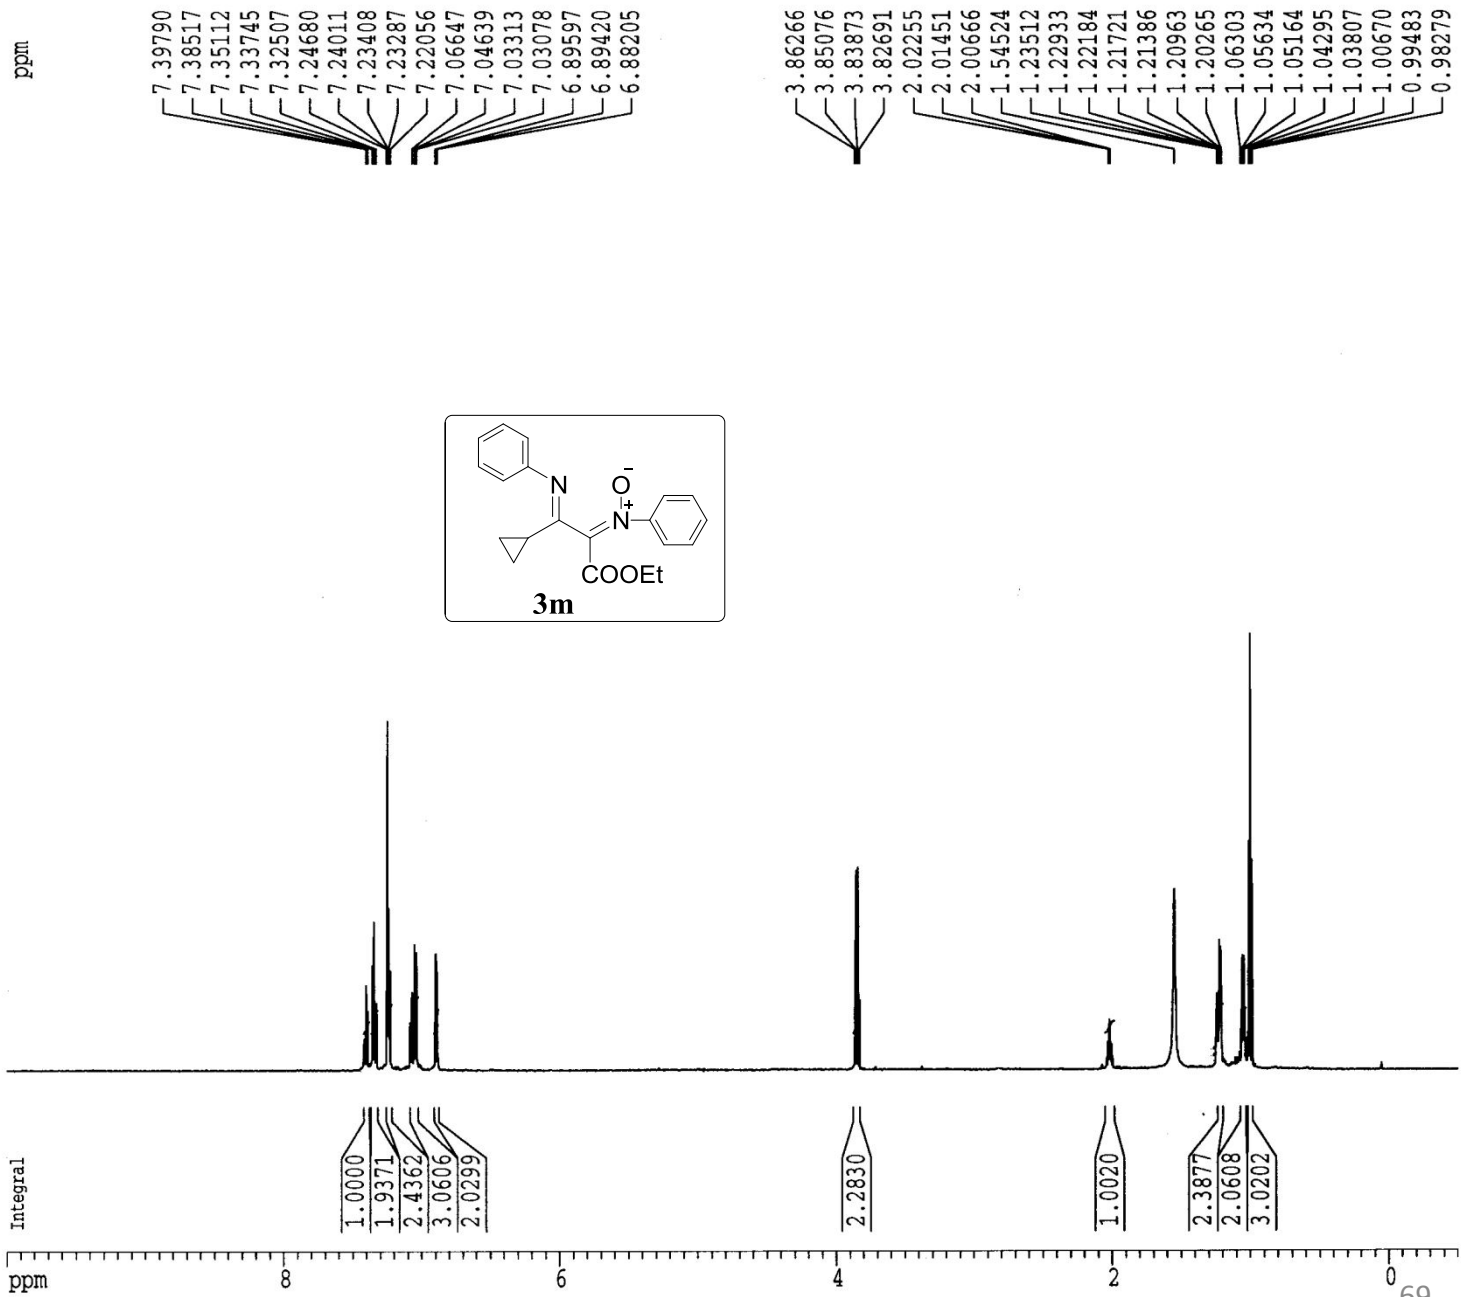

Current Data Parameters  
NAME RKS-1-166-P  
EXPNO 2  
PROCNO 1

F2 - Acquisition Parameters  
Date\_ 20140801  
Time 12.21  
INSTRUM spect  
PROBHD 5 mm QNP 1H/1  
PULPROG zgpg  
TD 32768  
SOLVENT CDCl3  
NS 8192  
DS 0  
SWH 45045.047 Hz  
FIDRES 1.374666 Hz  
AQ 0.3637748 sec  
RG 2048  
EW 11.100 usec  
DE 6.50 usec  
TE 301.8 K  
D1 3.50000000 sec  
d11 0.03000000 sec  
DELTA 3.40000010 sec  
MCREST 0.00000000 sec  
MCWRK 0.01500000 sec

=====  
CHANNEL f1  
NUC1 13C  
P1 4.80 usec  
PL1 0.00 dB  
SFO1 150.5597948 MHz

=====  
CHANNEL f2  
CPDPRG2 waltz16  
NUC2 1H  
PCPD2 92.00 usec  
PL2 120.00 dB  
PL12 9.00 dB  
PL13 14.00 dB  
SFO2 598.7029935 MHz

F2 - Processing parameters  
SI 65536  
SF 150.5432356 MHz  
WDW EM  
SSB 0  
LB 3.00 Hz  
GB 0  
PC 0.50

1D NMR plot parameters  
CX 20.00 cm  
CY 20.00 cm  
F1P 200.000 ppm  
F1 30108.65 Hz  
F2P 0.000 ppm  
F2 0.00 Hz  
PPMCM 10.00000 ppm/cm  
HZCM 1505.43225 Hz/cm

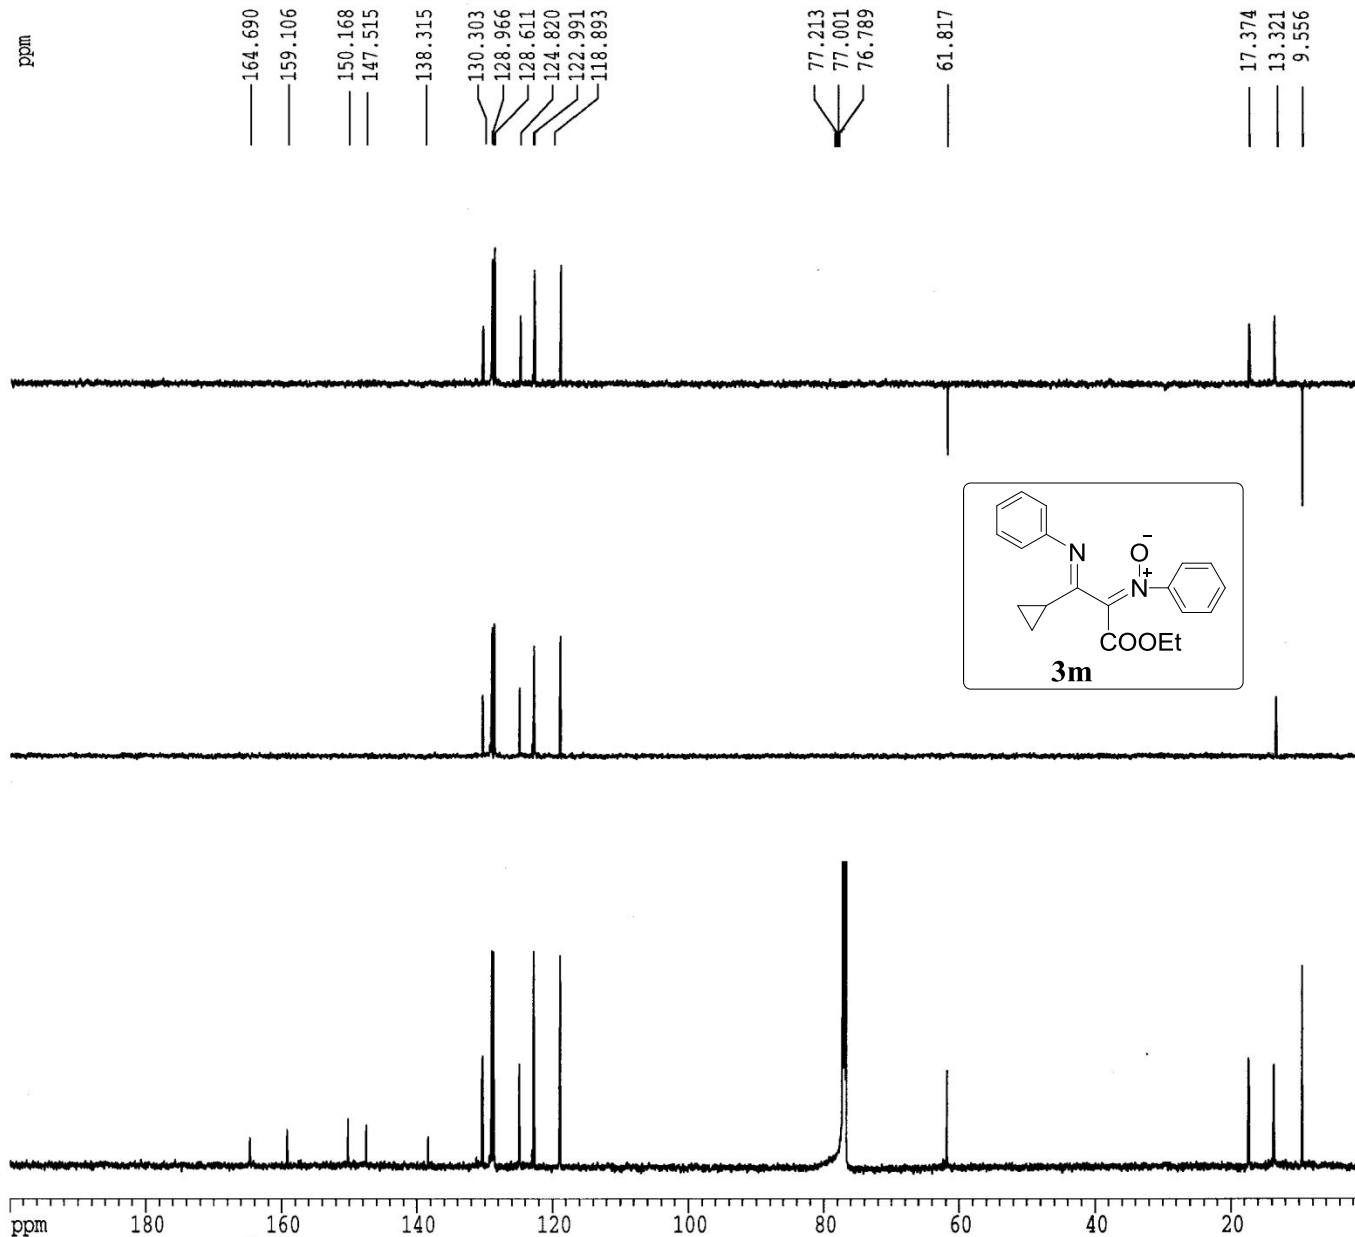

Current Data Parameters  
 NAME RKS-1-203  
 EXPNO 1  
 PROCNO 1

F2 - Acquisition Parameters  
 Date\_ 20131006  
 Time 20.26  
 INSTRUM spect  
 PROBHD 5 mm QNP 1H/1  
 PULPROG zg  
 TD 32768  
 SOLVENT CDCl3  
 NS 16  
 DS 0  
 SWH 8389.262 Hz  
 FIDRES 0.256020 Hz  
 AQ 1.9530228 sec  
 RG 256  
 DW 59.600 usec  
 DE 6.50 usec  
 TE 304.9 K  
 D1 2.0000000 sec  
 MCREST 0.0000000 sec  
 MCWRK 0.0150000 sec

==== CHANNEL f1 =====  
 NUC1 1H  
 P1 10.00 usec  
 PL1 0.00 dB  
 SFO1 598.8029940 MHz

F2 - Processing parameters  
 SI 32768  
 SF 598.8000287 MHz  
 WDW no  
 SSB 0  
 LB 0.00 Hz  
 GB 0  
 PC 1.00

1D NMR plot parameters  
 CX 20.00 cm  
 CY 8.00 cm  
 F1P 10.000 ppm  
 F1 5988.00 Hz  
 F2P -0.500 ppm  
 F2 -299.40 Hz  
 PPMCM 0.52500 ppm/cm  
 HZCM 314.37003 Hz/cm

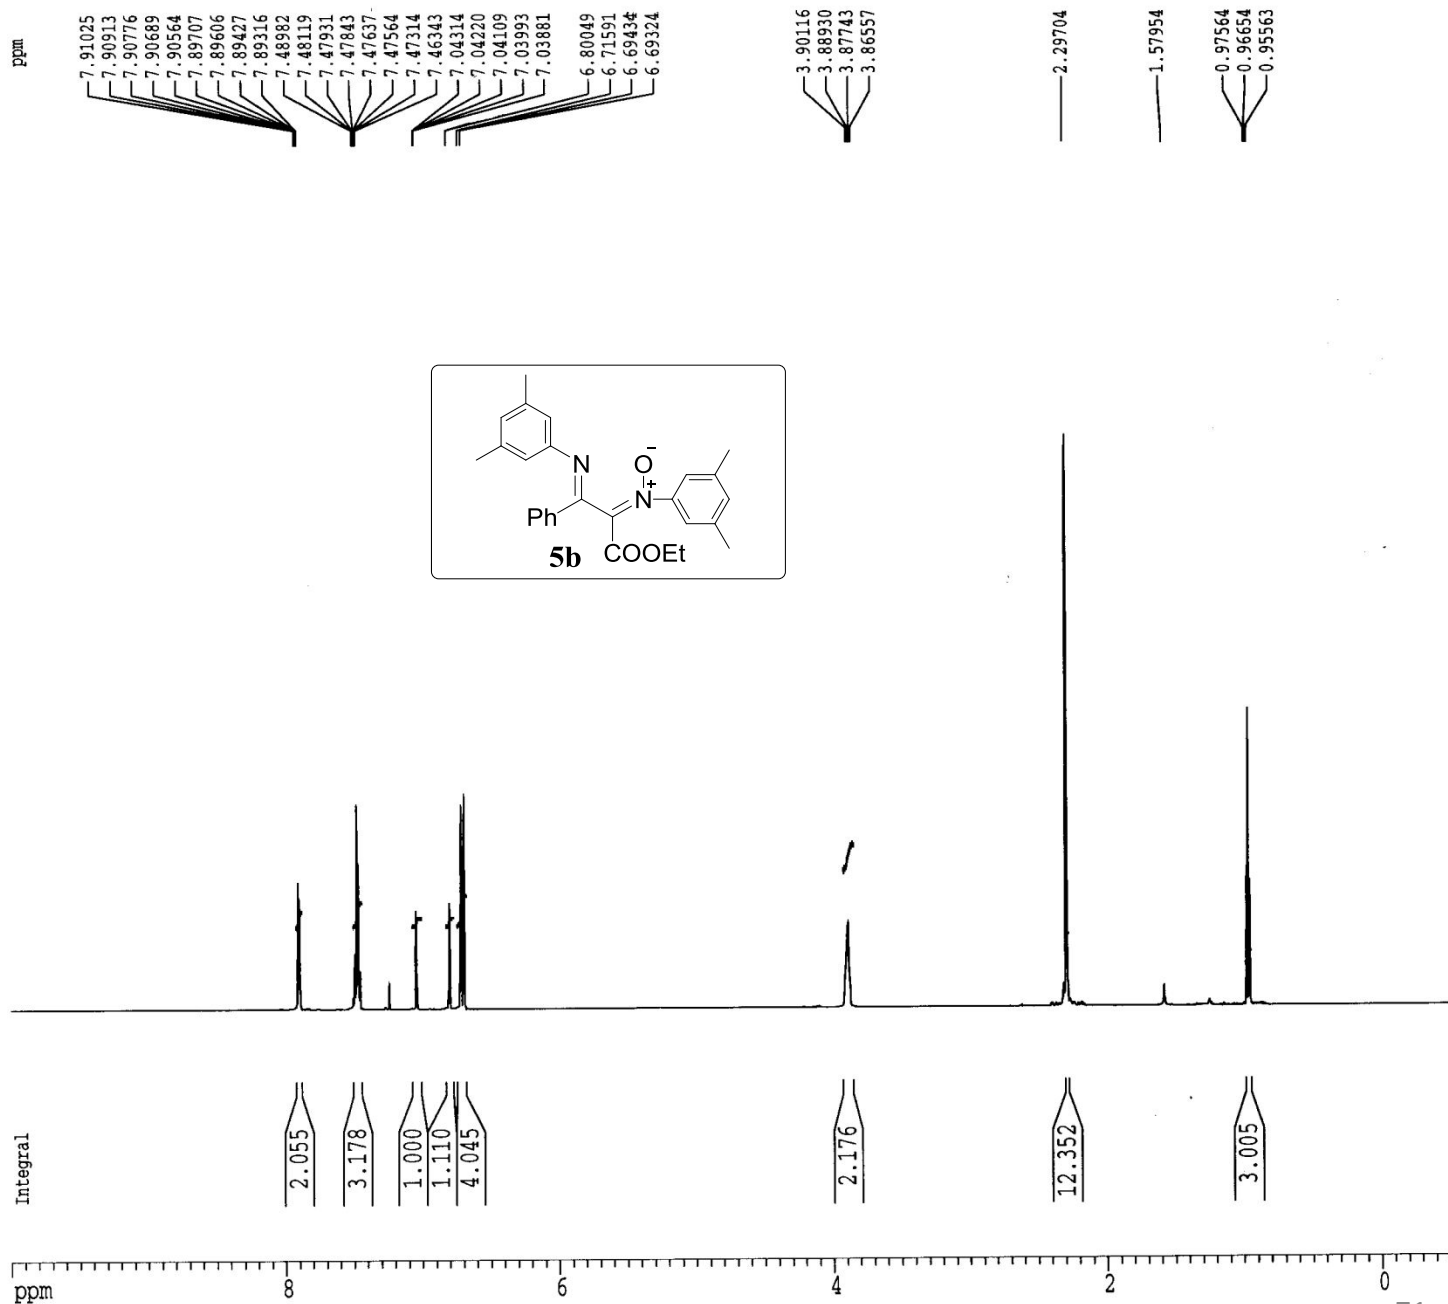





Current Data Parameters  
 NAME RKS-1-204  
 EXPNO 1  
 PROCNO 1

F2 - Acquisition Parameters

Date\_ 20131010  
 Time 12.45  
 INSTRUM spect  
 PROBHD 5 mm QNP 1H/1  
 PULPROG zg  
 TD 32768  
 SOLVENT CDCl3  
 NS 16  
 DS 0  
 SWH 8389.262 Hz  
 FIDRES 0.256020 Hz  
 AQ 1.9530228 sec  
 RG 256  
 DW 59.600 usec  
 DE 6.50 usec  
 TE 297.5 K  
 D1 2.0000000 sec  
 MCREST 0.0000000 sec  
 MCWRK 0.0150000 sec

===== CHANNEL f1 =====  
 NUC1 1H  
 P1 10.00 usec  
 PL1 0.00 dB  
 SFO1 598.7029935 MHz

F2 - Processing parameters

SI 32768  
 SF 598.7000250 MHz  
 WDW no  
 SSB 0  
 LB 0.00 Hz  
 GB 0  
 PC 1.00

1D NMR plot parameters

CX 20.00 cm  
 CY 8.00 cm  
 F1P 10.000 ppm  
 F1 5987.00 Hz  
 F2P -0.500 ppm  
 F2 -299.35 Hz  
 PPMCM 0.52500 ppm/cm  
 HZCM 314.31750 Hz/cm

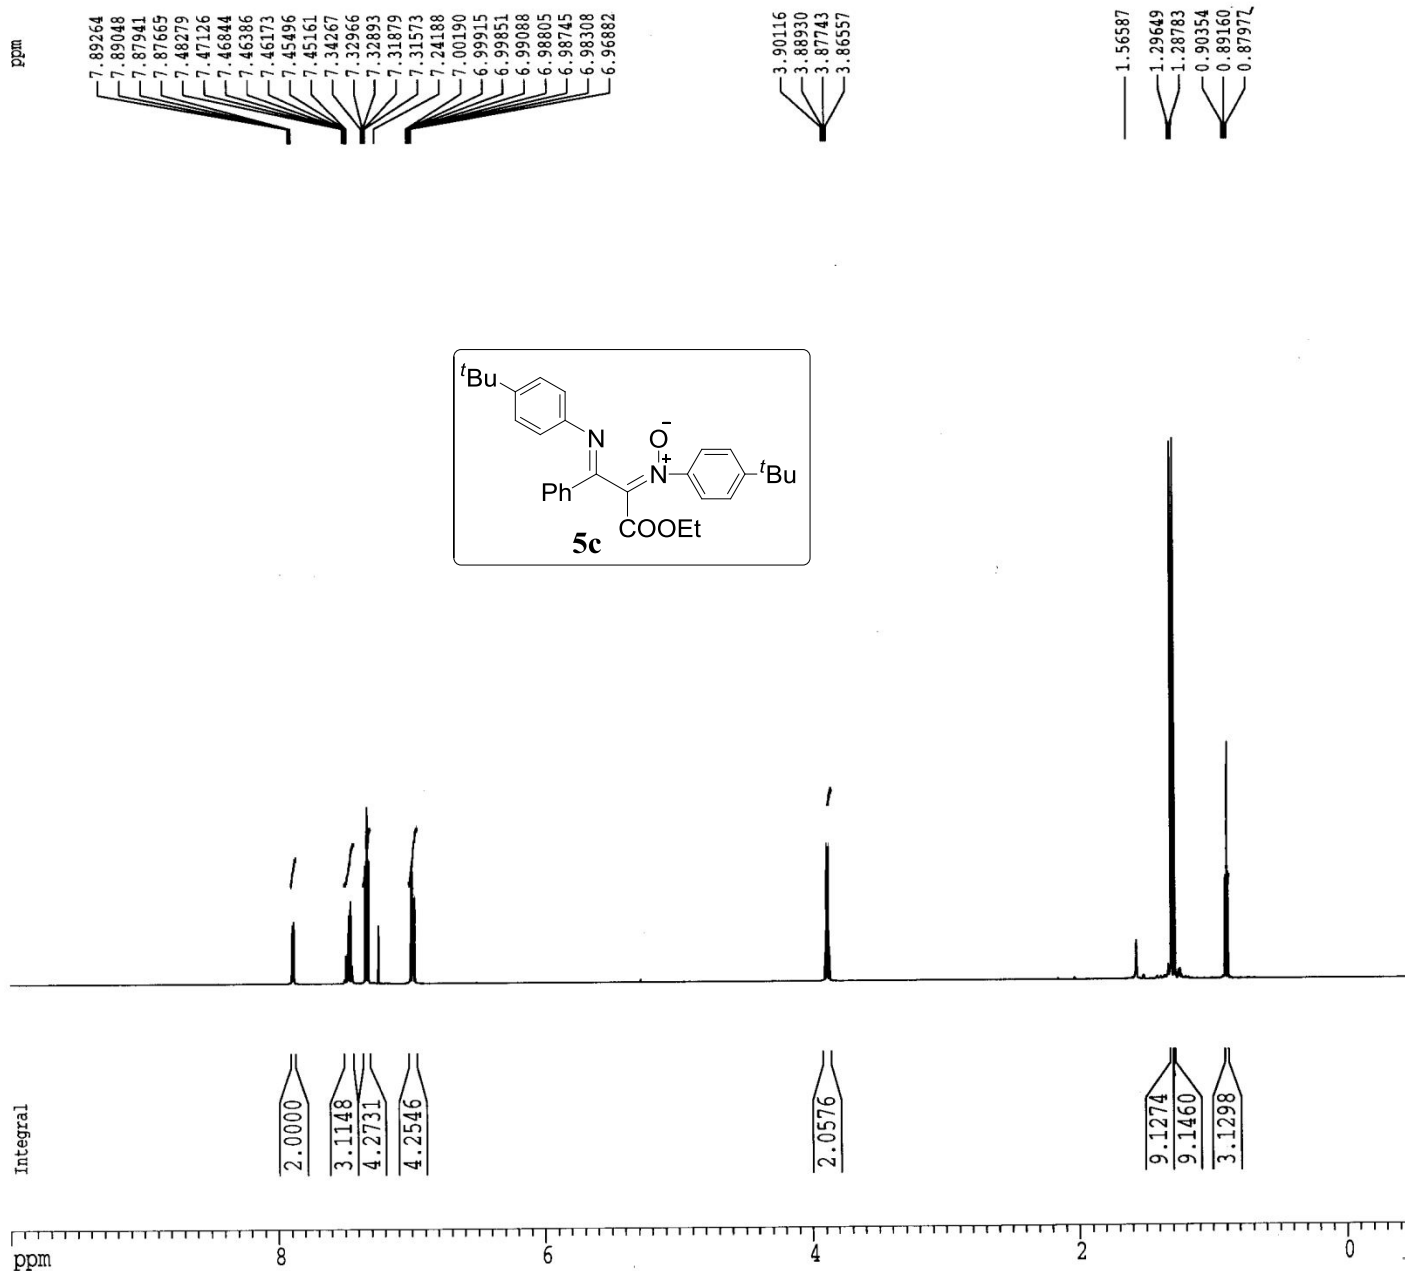

Current Data Parameters  
 NAME RKS-1-204  
 EXPNO 2  
 PROCNO 1

F2 - Acquisition Parameters  
 Date\_ 20131010  
 Time 12.46  
 INSTRUM spect  
 PROBHD 5 mm QNP 1H/1  
 PULPROG zgpg  
 TD 32768  
 SOLVENT CDCl3  
 NS 518  
 DS 0  
 SWH 45045.047 Hz  
 FIDRES 1.374666 Hz  
 AQ 0.3637748 sec  
 RG 2048  
 DW 11.100 usec  
 DE 6.50 usec  
 TE 297.7 K  
 D1 3.50000000 sec  
 d11 0.03000000 sec  
 DELTA 3.40000010 sec  
 MCREST 0.00000000 sec  
 MCWRK 0.01500000 sec

===== CHANNEL f1 =====  
 NUC1 13C  
 P1 4.80 usec  
 PL1 0.00 dB  
 SFO1 150.5597948 MHz

===== CHANNEL f2 =====  
 CPDPRG2 waltz16  
 NUC2 1H  
 PCPD2 92.00 usec  
 PL2 120.00 dB  
 PL12 9.00 dB  
 PL13 14.00 dB  
 SFO2 598.7029935 MHz

F2 - Processing parameters  
 SI 65536  
 SF 150.5432383 MHz  
 WDW EM  
 SSB 0  
 LB 3.00 Hz  
 GB 0  
 PC 0.50

1D NMR plot parameters  
 CK 20.00 cm  
 CY 4.00 cm  
 F1P 200.000 ppm  
 F1 30108.65 Hz  
 F2P 0.000 ppm  
 F2 0.00 Hz  
 PPMCM 10.00000 ppm/cm  
 HZCM 1505.43237 Hz/cm

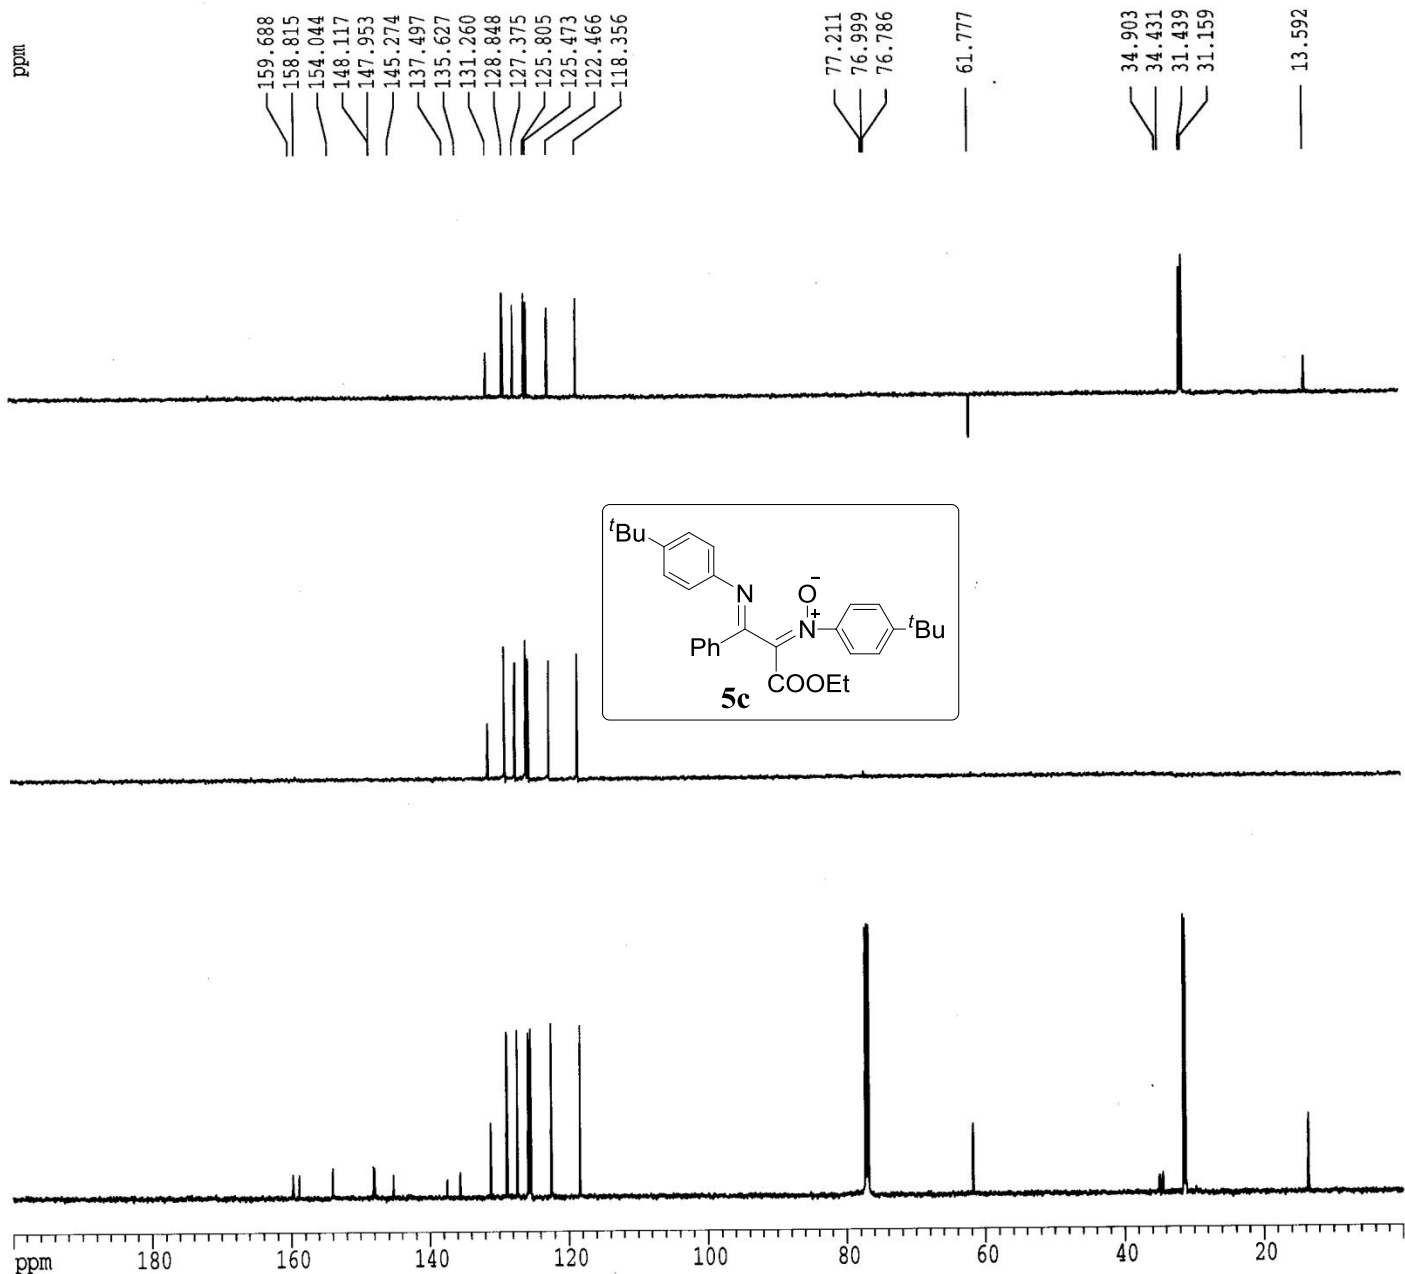

Current Data Parameters  
 NAME 20140429  
 EXPNO 2  
 PROCNO 1

F2 - Acquisition Parameters  
 Date\_ 20140429  
 Time 0.16  
 INSTRUM spect  
 PROBHD 5 mm DUL 13C-1  
 PULPROG zg30  
 TD 32768  
 SOLVENT CDCl3  
 NS 39  
 DS 0  
 SWH 6410.256 Hz  
 FIDRES 0.195625 Hz  
 AQ 2.5559540 sec  
 RG 456  
 DW 78.000 usec  
 DE 6.00 usec  
 TE 300.0 K  
 DI 2.00000000 sec  
 TDO 1

===== CHANNEL f1 =====  
 NUC1 1H  
 P1 10.00 usec  
 PL1 -2.40 dB  
 SFO1 400.1528010 MHz

F2 - Processing parameters  
 SI 16384  
 SF 400.1500168 MHz  
 WDW EM  
 SSB 0  
 LB 0.00 Hz  
 GB 0  
 PC 1.00

RKS-1-185-1

7.8799  
7.8767  
7.8619  
7.8566  
7.4650  
7.4626  
7.4577  
7.4447  
7.2426  
7.2403  
7.1782  
7.1610  
7.1582  
7.1558  
7.0303  
7.0134  
7.0105  
7.0081  
6.8719  
6.8664  
6.8607  
6.8585  
6.8523  
6.8495  
6.8412  
6.8384  
6.8366  
3.9083  
3.8906  
3.8728  
3.8539  
3.8057  
3.7763  
1.5573  
0.9641  
0.9485  
0.9460

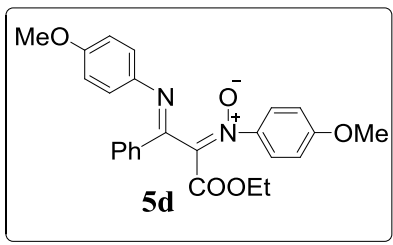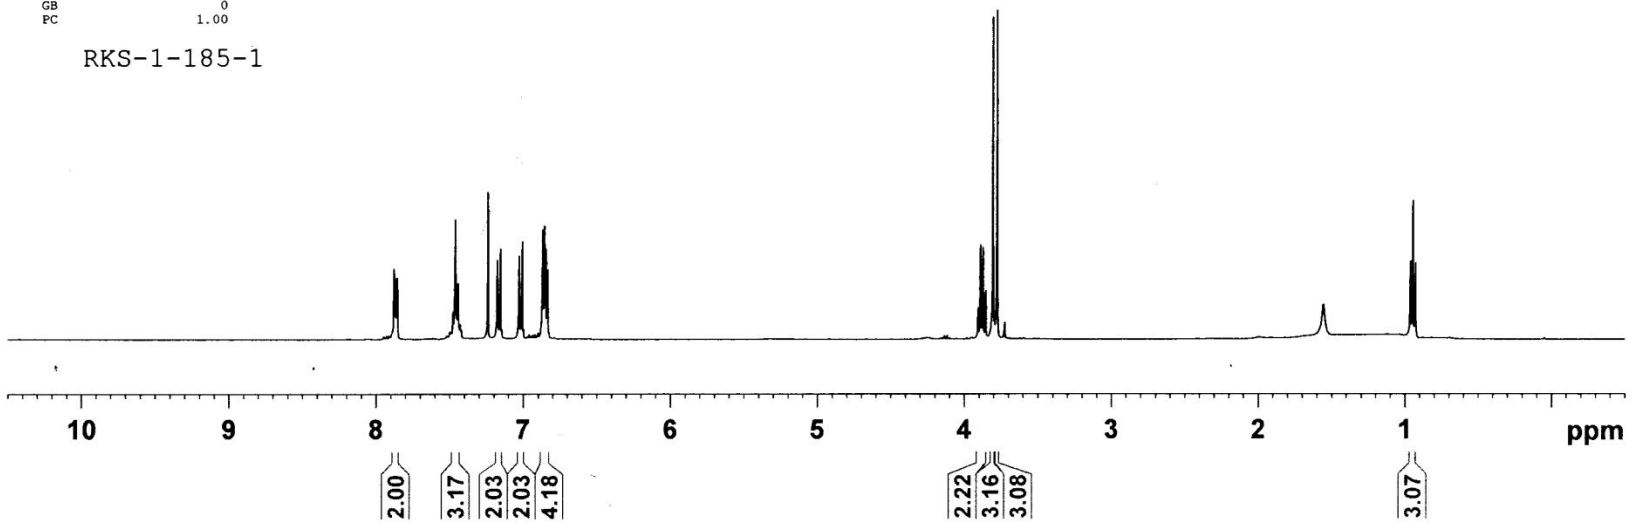

Current Data Parameters  
 NAME 20140429  
 EXPNO 3  
 PROCNO 1

F2 - Acquisition Parameters  
 Date\_ 20140429  
 Time\_ 0.22  
 INSTRUM spect  
 PROBHD 5 mm DUL 13C-1  
 PULPROG zgpg30  
 TD 65536  
 SOLVENT CDC13  
 NS 7888  
 DS 0  
 SWH 22727.273 Hz  
 FIDRES 0.346791 Hz  
 AQ 1.4418420 sec  
 RG 59  
 DW 22.000 usec  
 DE 6.000 usec  
 TE 300.0 K  
 D1 2.00000000 sec  
 d11 0.03000000 sec  
 DELTA 1.89999998 sec  
 TDO 1

==== CHANNEL f1 =====  
 NUC1 13C  
 P1 9.70 usec  
 PL1 -0.50 dB  
 SFO1 100.6288660 MHz

==== CHANNEL f2 =====  
 CPDPRG2 waltz16  
 NUC2 1H  
 PCPD2 90.00 usec  
 PL2 -2.40 dB  
 PL12 15.10 dB  
 PL13 18.10 dB  
 SFO2 400.1516010 MHz

F2 - Processing parameters  
 SI 32768  
 SF 100.6177998 MHz  
 WDW EM  
 SSB 0  
 LB 3.00 Hz  
 GB 0  
 PC 1.00

161.228  
 159.796  
 158.673  
 157.587  
 143.848  
 140.699  
 137.283  
 135.768  
 131.169  
 128.856  
 127.286  
 124.413  
 120.247  
 114.041  
 113.974  
 77.319  
 77.001  
 76.684  
 61.892  
 55.596  
 55.456  
 13.738

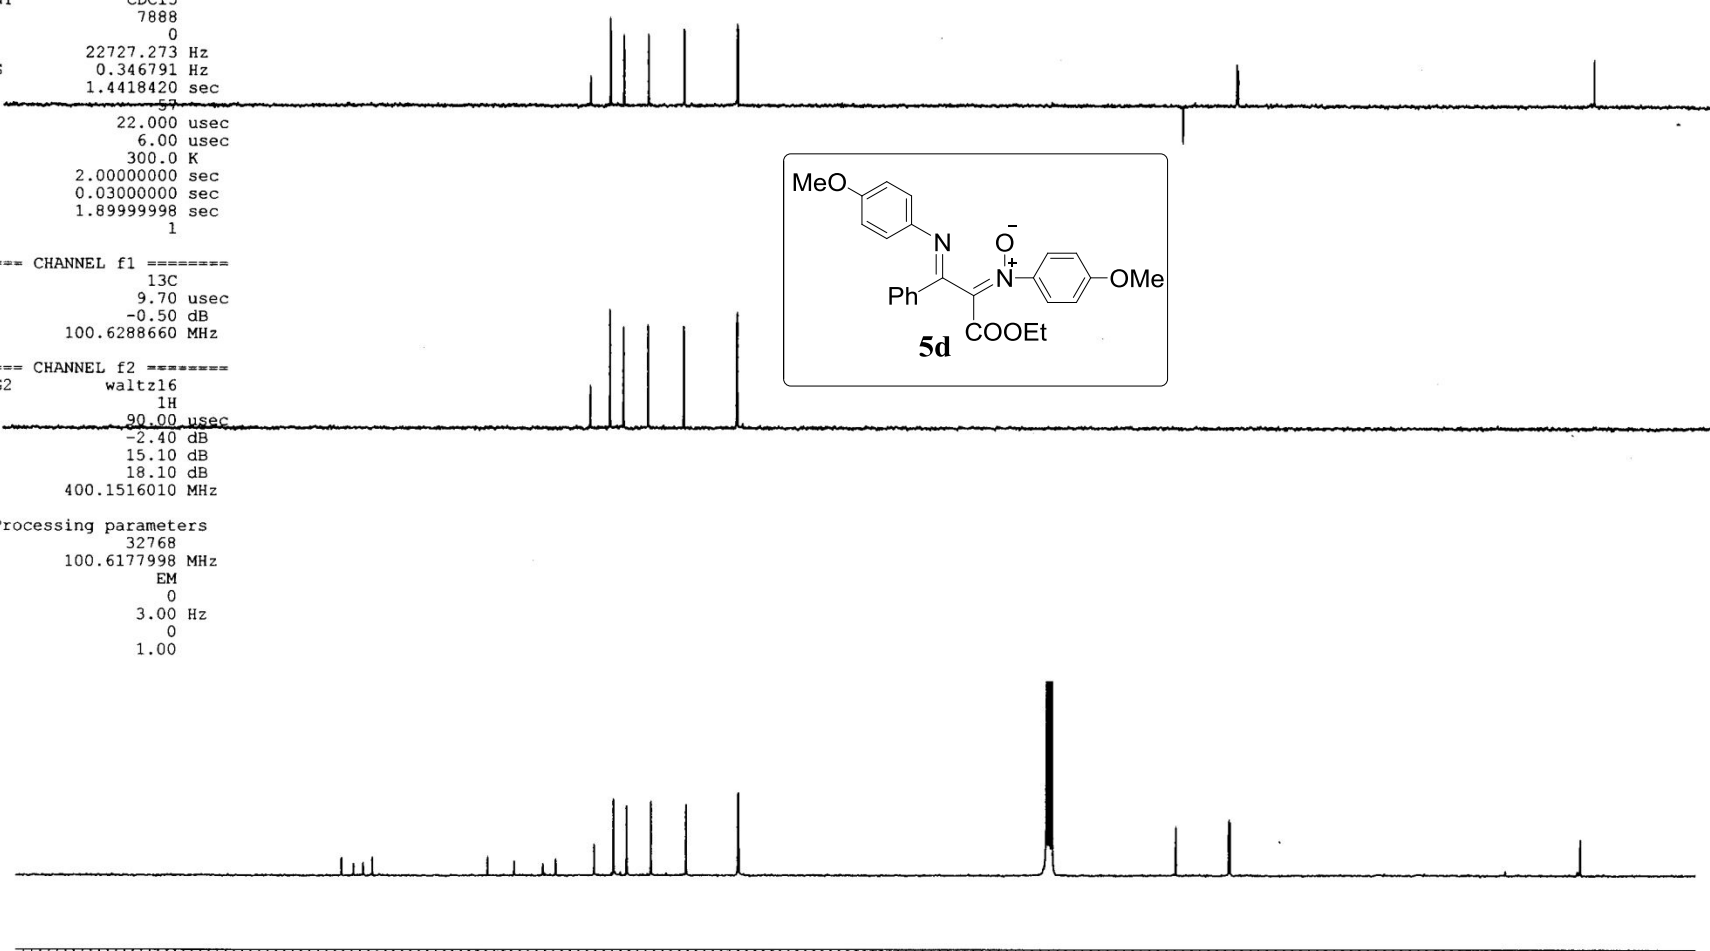

190 180 170 160 150 140 130 120 110 100 90 80 70 60 50 40 30 20 ppm

Current Data Parameters  
 NAME RKS-1-187  
 EXPNO 1  
 PROCNO 1

F2 - Acquisition Parameters

Date\_ 20130912  
 Time 14.16  
 INSTRUM spect  
 PROBHD 5 mm QNP 1H/1  
 PULPROG zg  
 TD 47890  
 SOLVENT CDCl3  
 NS 16  
 DS 0  
 SWH 7183.908 Hz  
 FIDRES 0.150009 Hz  
 AQ 3.3331940 sec  
 RG 128  
 DW 69.600 usec  
 DE 6.50 usec  
 TE 302.4 K  
 D1 2.00000000 sec  
 MCREST 0.00000000 sec  
 MCWRK 0.01500000 sec

==== CHANNEL f1 =====

NUC1 1H  
 P1 10.00 usec  
 PL1 0.00 dB  
 SFO1 598.8029940 MHz

F2 - Processing parameters

SI 32768  
 SF 598.8000289 MHz  
 WDW no  
 SSB 0  
 LB 0.00 Hz  
 GB 0  
 PC 1.00

1D NMR plot parameters

CX 20.00 cm  
 CY 4.00 cm  
 F1P 10.000 ppm  
 F1 5988.00 Hz  
 F2P -0.500 ppm  
 F2 -299.40 Hz  
 PPMCM 0.52500 ppm/cm  
 HZCM 314.37003 Hz/cm

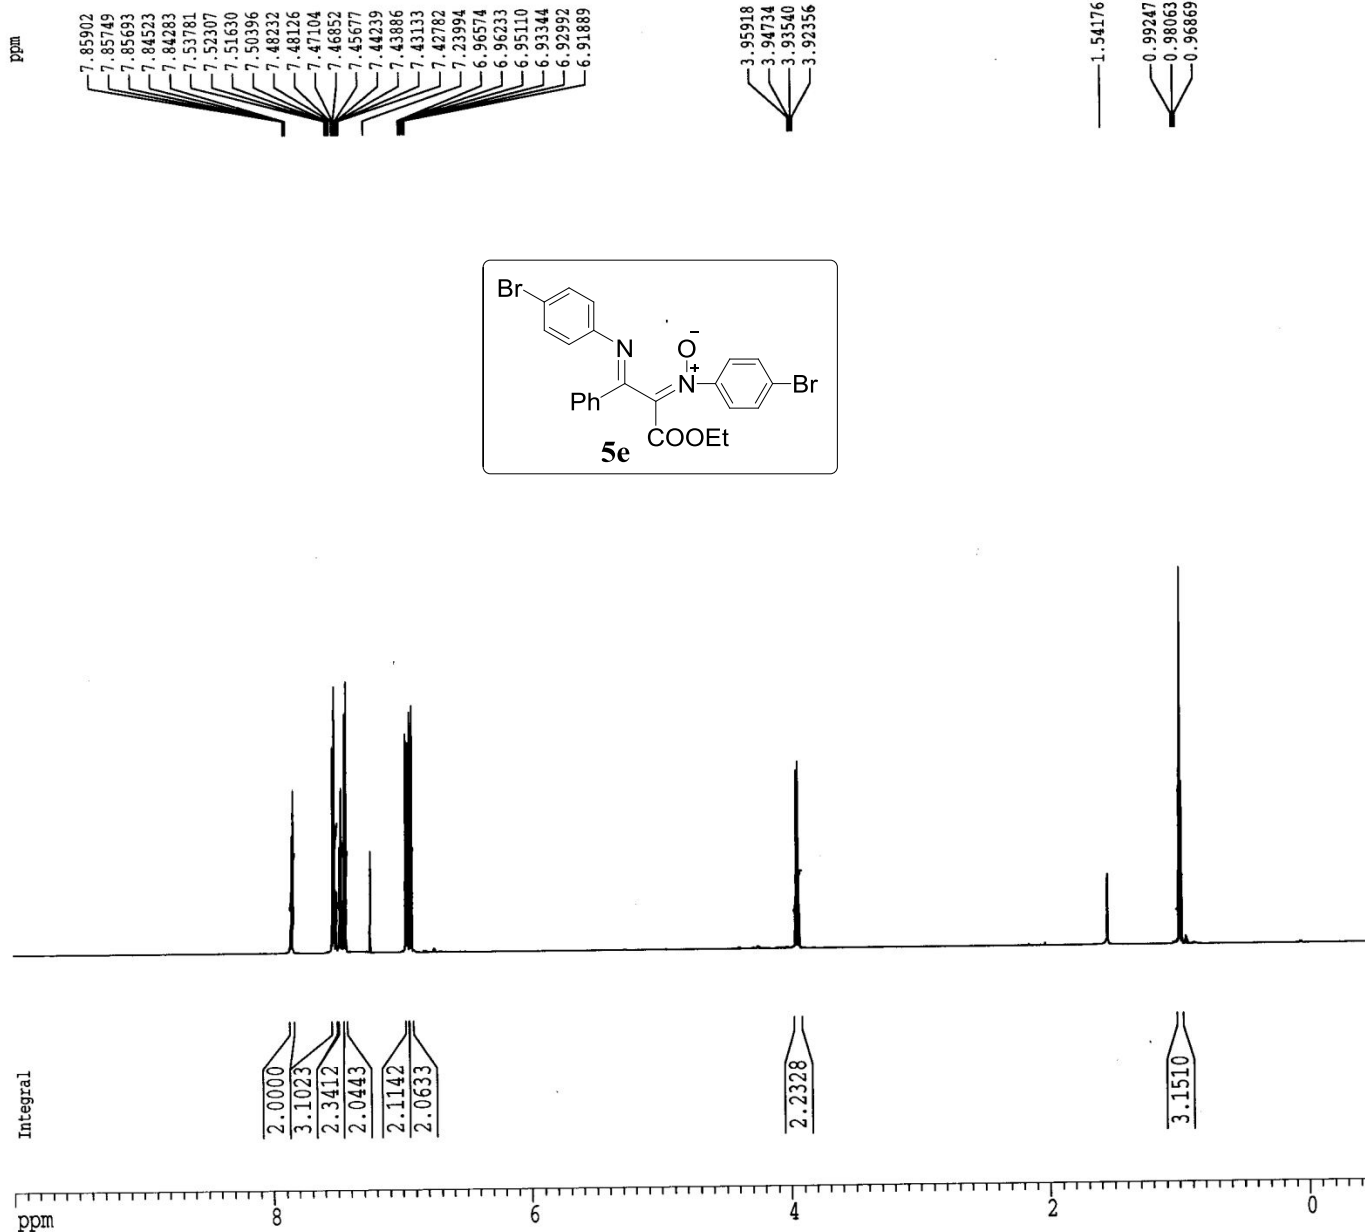

Current Data Parameters  
 NAME RKS-1-187  
 EXPNO 2  
 PROCNO 1

F2 - Acquisition Parameters  
 Date\_ 20130912  
 Time 14.19  
 INSTRUM spect  
 PROBHD 5 mm QNP 1H/1  
 PULPROG zgpg  
 TD 32768  
 SOLVENT CDCl3  
 NS 324  
 DS 0  
 SWH 45045.047 Hz  
 FIDRES 1.374666 Hz  
 AQ 0.3637748 sec  
 RG 2048  
 DW 11.100 usec  
 DE 6.50 usec  
 TE 302.9 K  
 D1 3.5000000 sec  
 d11 0.0300000 sec  
 DELTA 3.4000010 sec  
 MCREST 0.0000000 sec  
 MCWRK 0.0150000 sec

==== CHANNEL f1 =====  
 NUC1 13C  
 P1 4.80 usec  
 PL1 0.00 dB  
 SFO1 150.5849425 MHz

==== CHANNEL f2 =====  
 CPDPRG2 waltz16  
 NUC2 1H  
 PCPD2 92.00 usec  
 PL2 120.00 dB  
 PL12 9.00 dB  
 PL13 14.00 dB  
 SFO2 598.8029940 MHz

F2 - Processing parameters  
 SI 65536  
 SF 150.5683821 MHz  
 WDW EM  
 SSB 0  
 LB 2.00 Hz  
 GB 0  
 PC 0.50

1D NMR plot parameters  
 CX 20.00 cm  
 CY 4.00 cm  
 F1P 200.000 ppm  
 F1 30113.68 Hz  
 F2P 0.000 ppm  
 F2 0.00 Hz  
 PPMCM 10.00000 ppm/cm  
 HZCM 1505.68372 Hz/cm

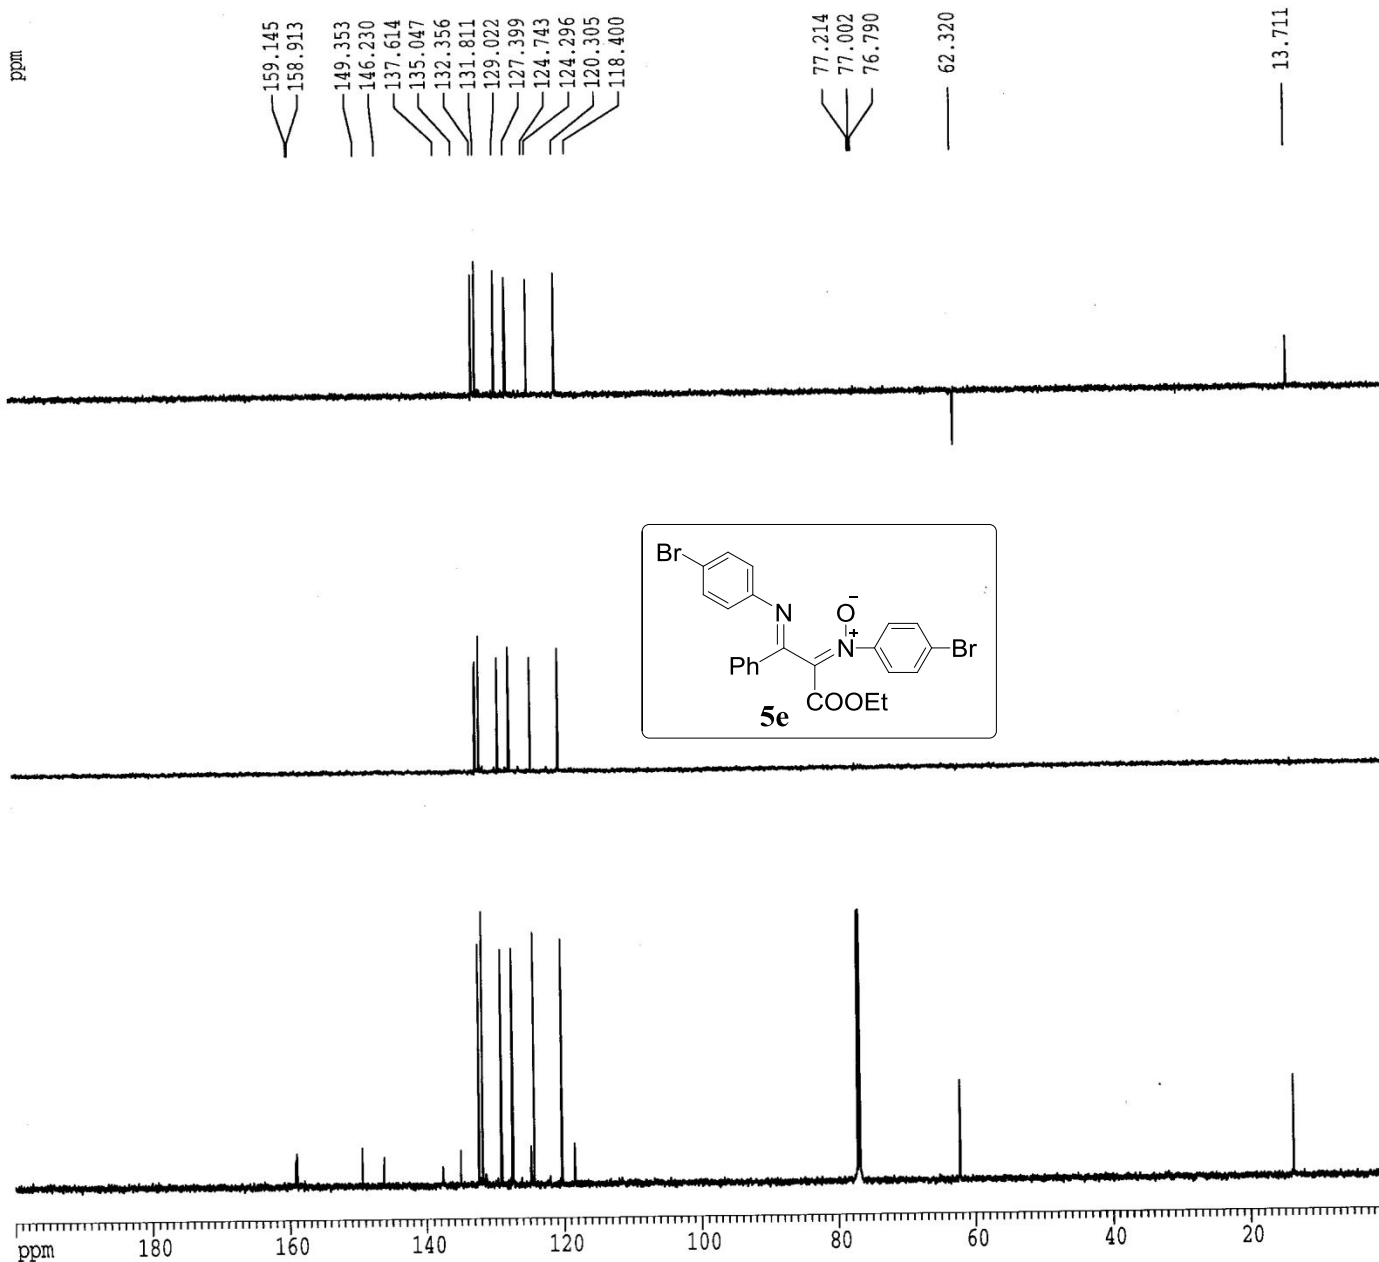

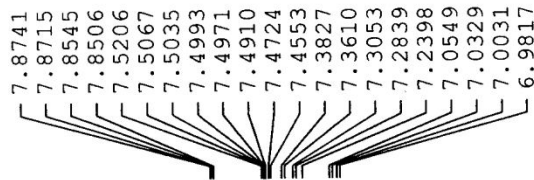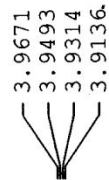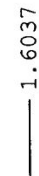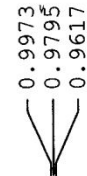

Current Data Parameters  
NAME 20140425  
EXPNO 5  
PROCNO 1

F2 - Acquisition Parameters  
Date\_ 20140425  
Time 23.21  
INSTRUM spect  
PROBHD 5 mm DUL 13C-1  
PULPROG zg30  
TD 32768  
SOLVENT CDCl3  
NS 30  
DS 0  
SWH 6410.256 Hz  
FIDRES 0.195625 Hz  
AQ 2.5559540 sec  
RG 128  
DW 78.000 usec  
DE 6.00 usec  
TE 300.0 K  
D1 2.00000000 sec  
TDO 1

----- CHANNEL f1 -----  
NUC1 1H  
P1 10.00 usec  
PL1 -2.40 dB  
SF01 400.1528010 MHz

F2 - Processing parameters  
SI 16384  
SF 400.1500175 MHz  
WDW EM  
SSB 0  
LB 0.00 Hz  
GB 0  
PC 1.00

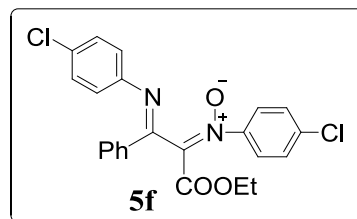

RKS--1-182-1

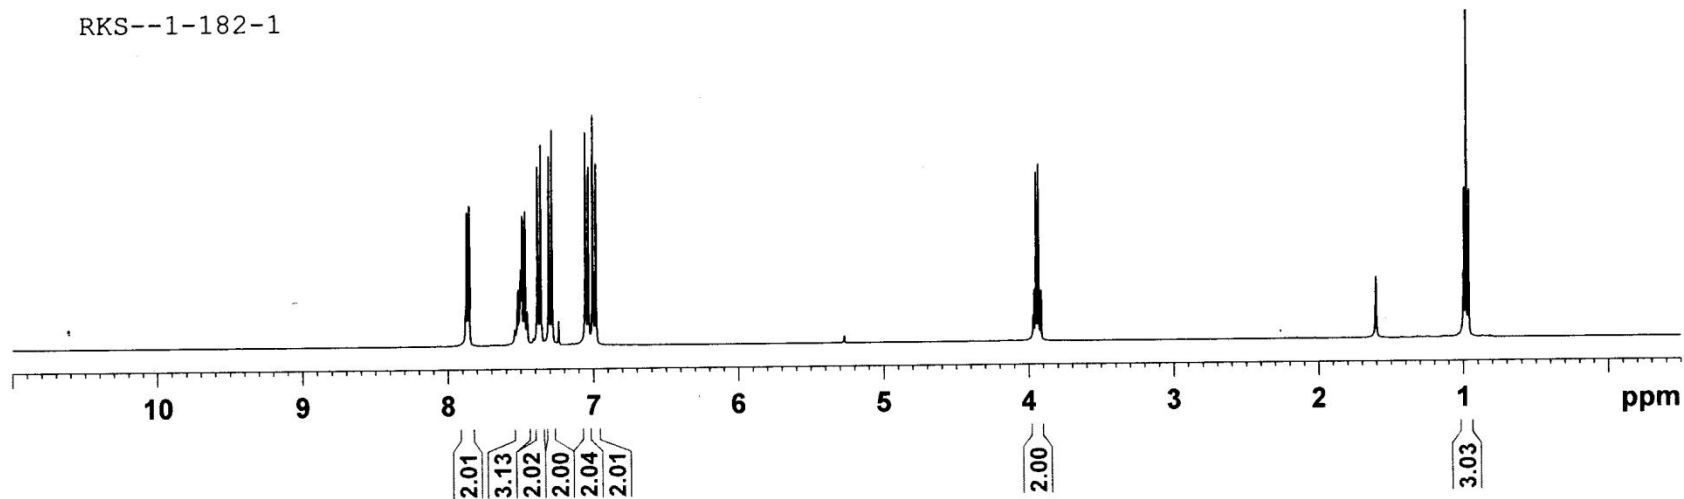

Current Data Parameters  
 NAME 20140425  
 EXPNO 2  
 PROCNO 1

F2 - Acquisition Parameters  
 Date\_ 20140425  
 Time\_ 22.15  
 INSTRUM spect  
 PROBHD 5 mm DUL 13C-1  
 PULPROG zgpg30  
 TD 65536  
 SOLVENT CDC13  
 NS 723  
 DS 0  
 SWH 22727.273 Hz  
 FIDRES 0.346791 Hz  
 AQ 1.4418420 sec  
 RG  
 DW 22.000 usec  
 DE 6.00 usec  
 TE 300.0 K  
 D1 2.00000000 sec  
 d11 0.03000000 sec  
 DELTA 1.89999998 sec  
 TDO 1

===== CHANNEL f1 =====  
 NUC1 13C  
 P1 9.70 usec  
 PL1 -0.50 dB  
 SFO1 100.6288660 MHz

===== CHANNEL f2 =====  
 CPDPRG2 waltz16  
 NUC2 1H  
 PCPD2 90.00 usec  
 PL2 -2.40 dB  
 PL12 15.10 dB  
 PL13 18.10 dB  
 SFO2 400.1516010 MHz

F2 - Processing parameters  
 SI 32768  
 SF 100.6178057 MHz  
 WDW EM  
 SSB 0  
 LB 3.00 Hz  
 GB 0  
 PC 1.00

159.095  
 158.953  
 148.807  
 145.638  
 137.574  
 136.626  
 134.958  
 131.790  
 130.650  
 129.327  
 128.986  
 128.830  
 127.329  
 124.036  
 119.883

77.306  
 76.988  
 76.670

62.276

13.668

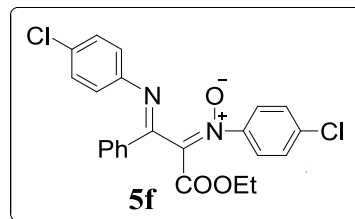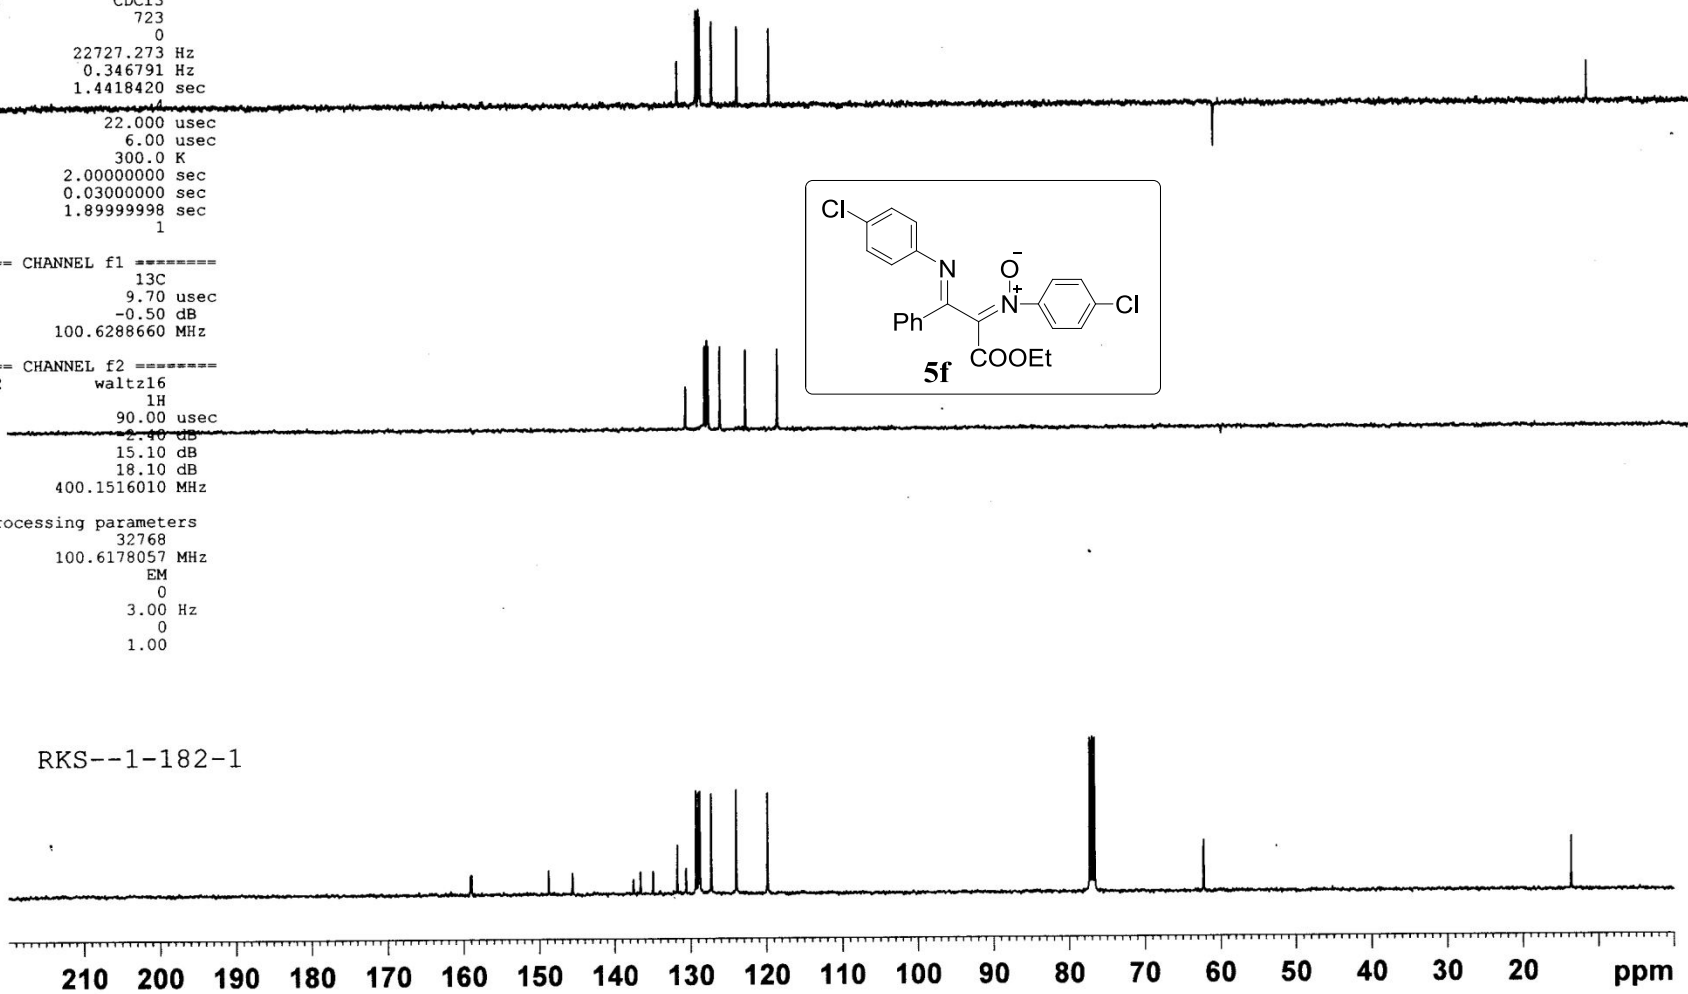

RKS--1-182-1



Current Data Parameters  
 NAME RKS-2-143  
 EXPNO 1  
 PROCNO 1

F2 - Acquisition Parameters  
 Date\_ 20140814  
 Time 19.54  
 INSTRUM spect  
 PROBHD 5 mm QNP 1H/1  
 PULPROG zg  
 TD 32768  
 SOLVENT CDCl3  
 NS 16  
 DS 0  
 SWH 9615.385 Hz  
 FIDRES 0.293438 Hz  
 AQ 1.7039860 sec  
 RG 128  
 DW 52.000 usec  
 DE 6.50 usec  
 TE 302.5 K  
 D1 2.00000000 sec  
 MCREST 0.00000000 sec  
 MCWRK 0.01500000 sec

===== CHANNEL f1 =====  
 NUC1 1H  
 P1 10.00 usec  
 PL1 3.00 dB  
 SFO1 598.7029935 MHz

F2 - Processing parameters  
 SI 32768  
 SF 598.7000255 MHz  
 WDW no  
 SSB 0  
 LB 0.00 Hz  
 GB 0  
 PC 1.00

1D NMR plot parameters  
 CX 20.00 cm  
 CY 6.00 cm  
 FIP 10.000 ppm  
 F1 5987.00 Hz  
 F2P -0.500 ppm  
 F2 -299.35 Hz  
 PPMCM 0.52500 ppm/cm  
 HZCM 314.31750 Hz/cm

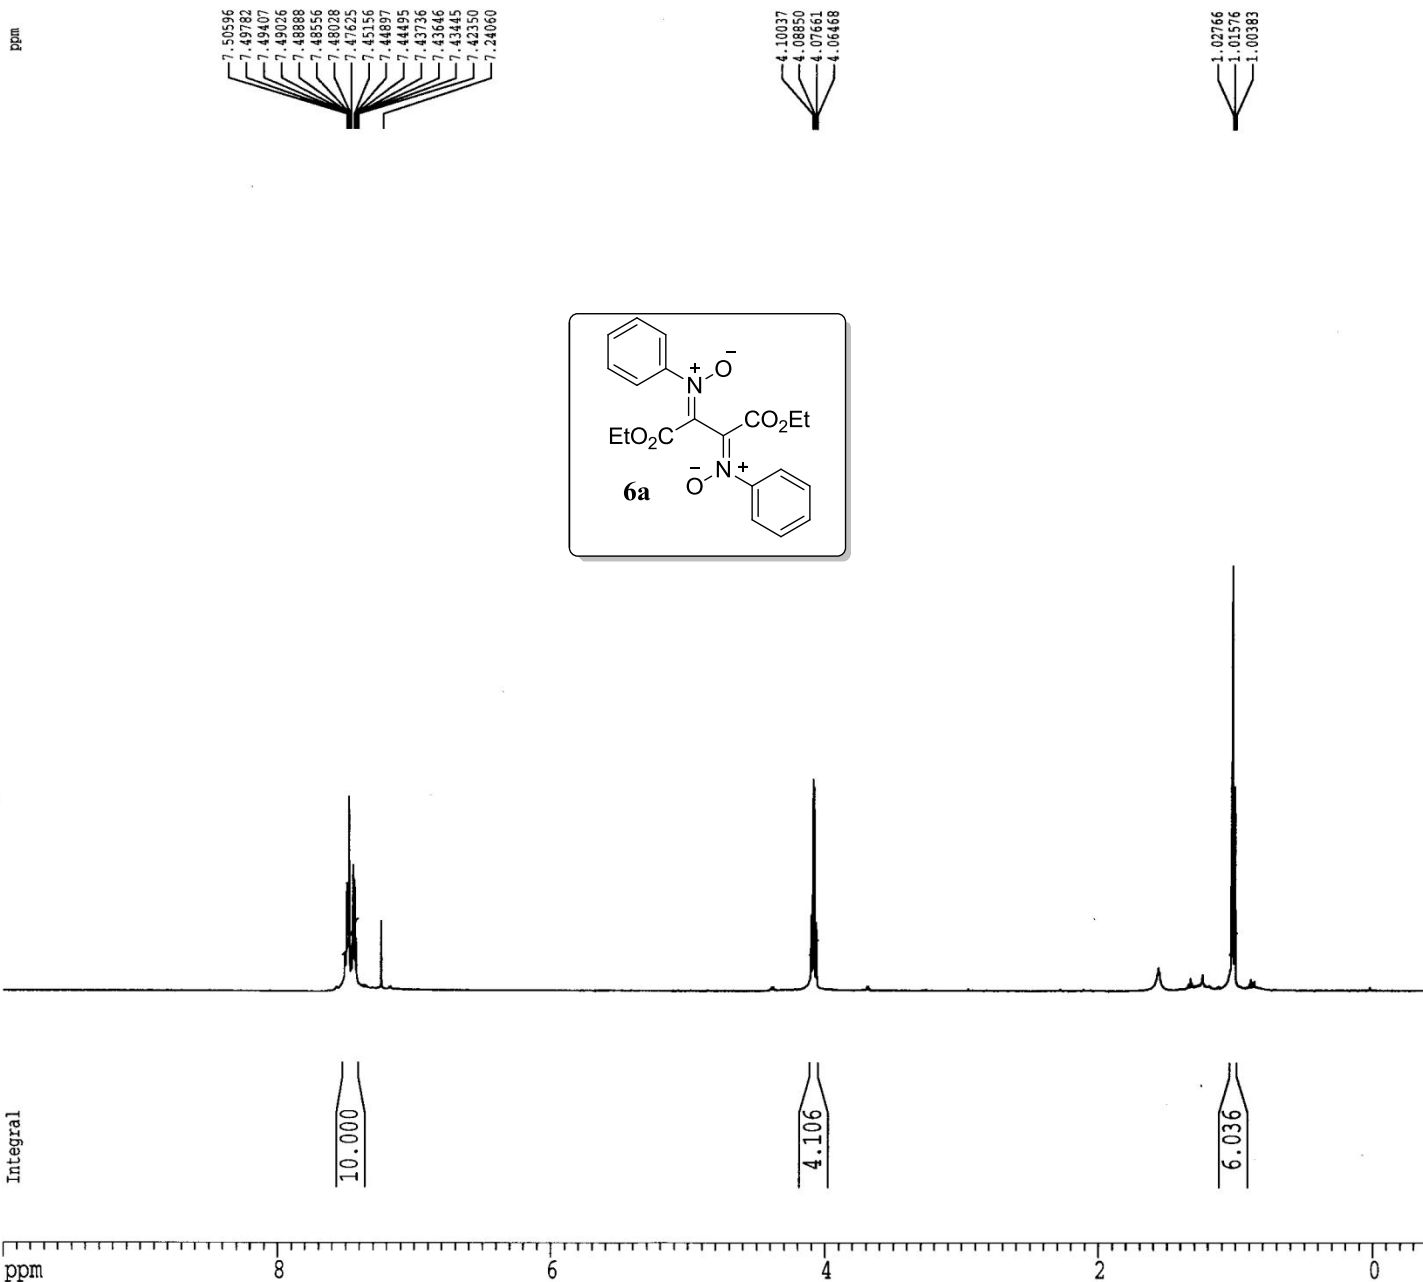

Current Data Parameters  
 NAME RKS-2-143  
 EXPNO 2  
 PROCNO 1

F2 - Acquisition Parameters  
 Date\_ 20140814  
 Time 19.54  
 INSTRUM spect  
 PROBHD 5 mm QNP 1H/1  
 PULPROG zgpg  
 TD 32768  
 SOLVENT CDC13  
 NS 331  
 DS 0  
 SWH 45045.047 Hz  
 FIDRES 1.374666 Hz  
 AQ 0.3637748 sec  
 RG 2048  
 DW 11.100 usec  
 DE 6.50 usec  
 TE 302.5 K  
 D1 3.5000000 sec  
 d11 0.0300000 sec  
 DELTA 3.4000010 sec  
 MCREST 0.0000000 sec  
 MCWRK 0.0150000 sec

===== CHANNEL f1 =====  
 NUC1 13C  
 P1 4.80 usec  
 PL1 0.00 dB  
 SFO1 150.5597948 MHz

===== CHANNEL f2' =====  
 CPDPRG2 waltz16  
 NUC2 1H  
 PCPD2 92.00 usec  
 PL2 120.00 dB  
 PL12 9.00 dB  
 PL13 14.00 dB  
 SFO2 598.7029935 MHz

F2 - Processing parameters  
 SI 65536  
 SF 150.5432369 MHz  
 WDW EM  
 SSB 0  
 LB 3.00 Hz  
 GB 0  
 PC 0.50

1D NMR plot parameters  
 CX 20.00 cm  
 CY 4.00 cm  
 F1P 200.000 ppm  
 F1 30108.65 Hz  
 F2P 0.000 ppm  
 F2 0.00 Hz  
 PPMCM 10.00000 ppm/cm  
 HZCM 1505.43237 Hz/cm

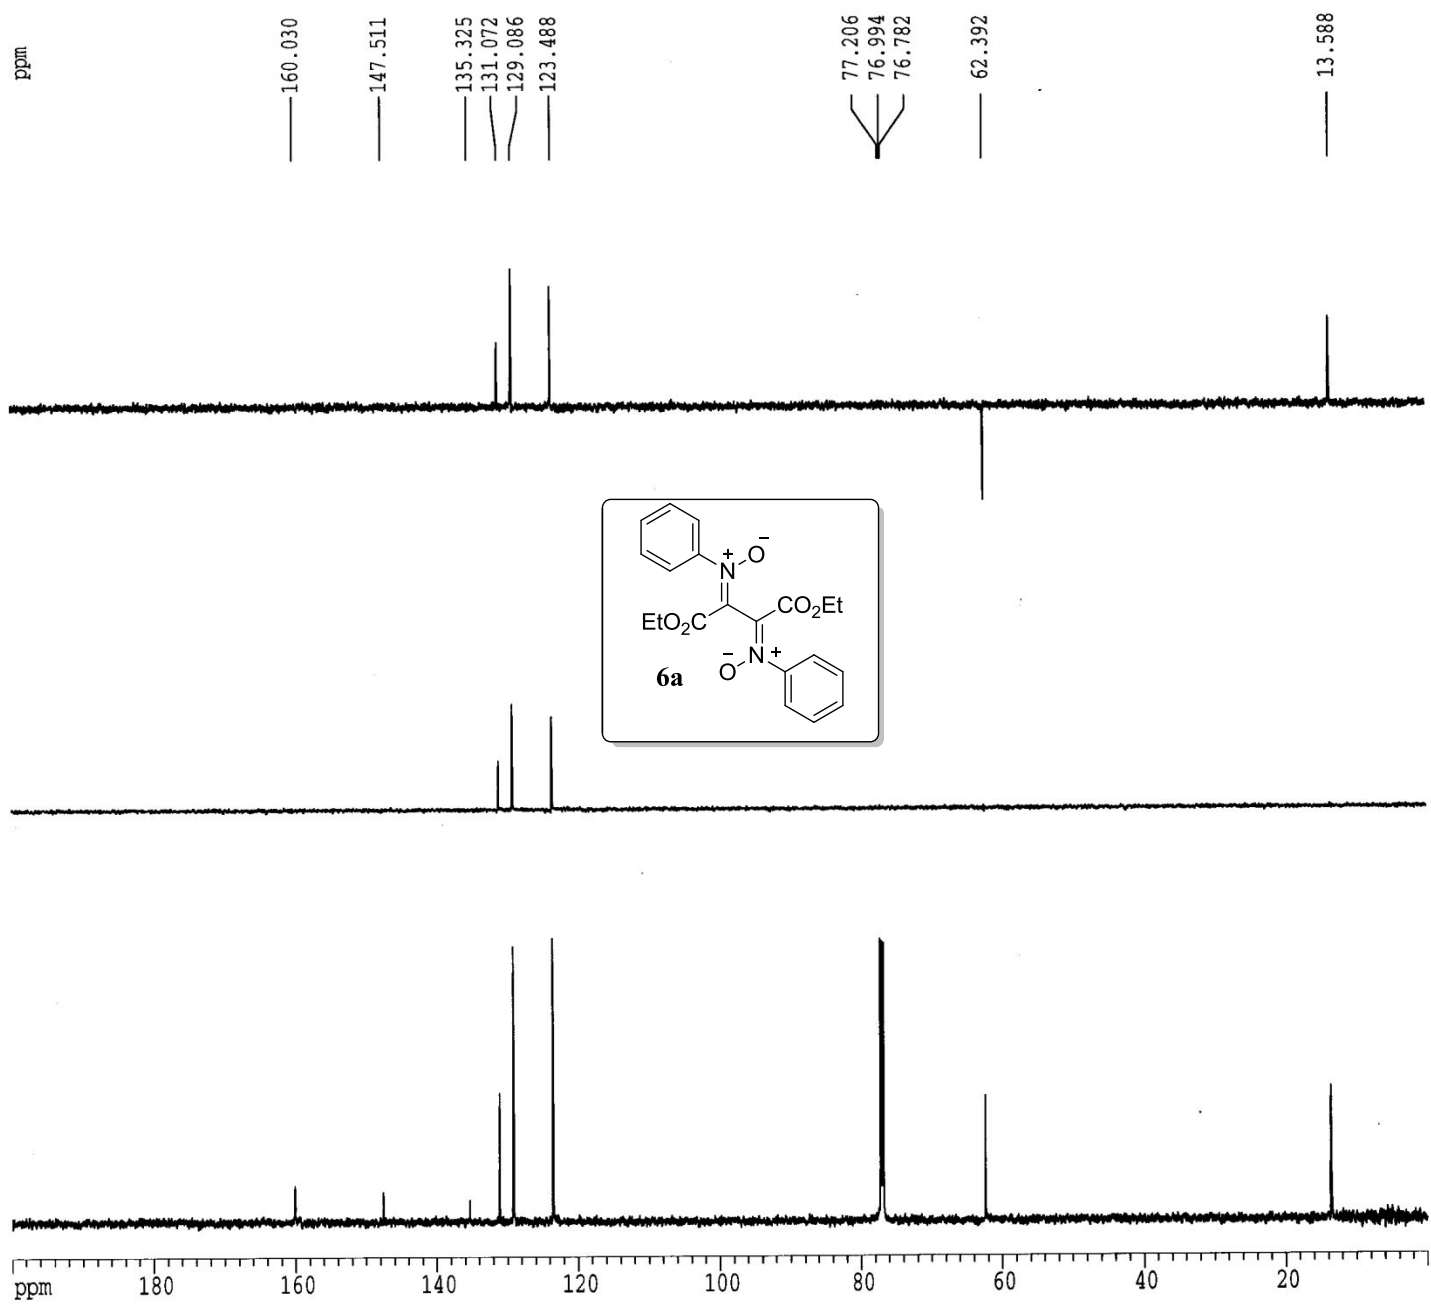

Supplement: c4cc06962e1.pdf [file c4cc06962e1.pdf]
